# Supplementary material for: Examining two sets of introgression lines across multiple environments reveals background-independent and stably expressed quantitative trait loci of fiber quality in cotton
Source: PubMed Central journal article supplement (PMC7311500; doi:10.1007/s00122-020-03578-0), 2020-03-17

**36Pop**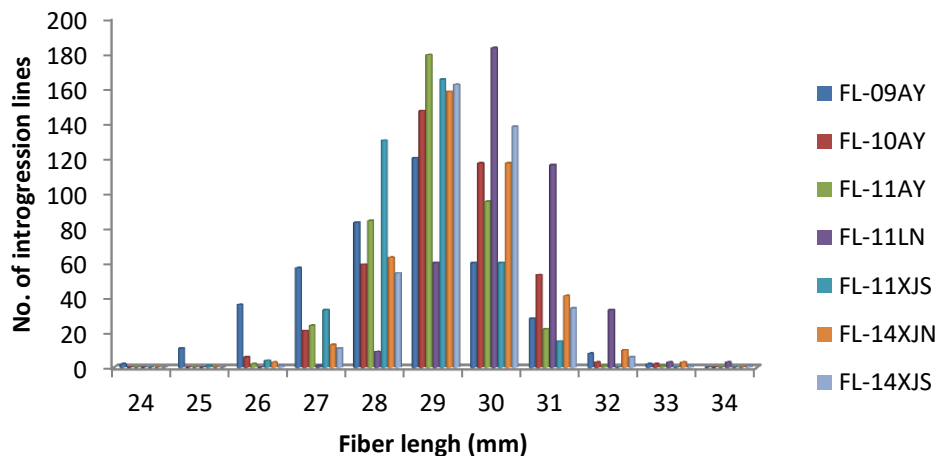**45Pop**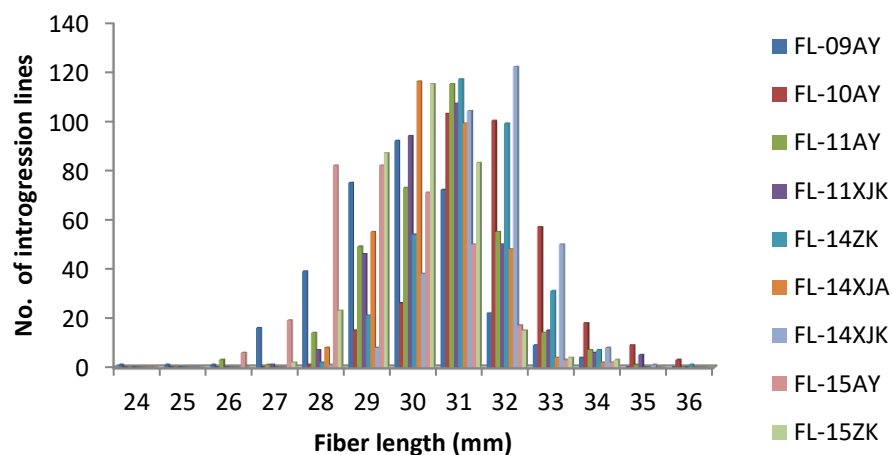**36Pop**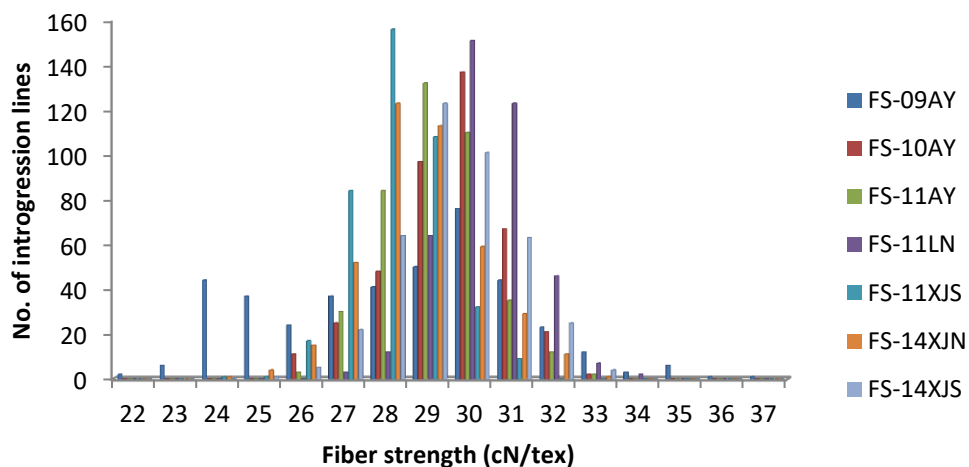**45Pop**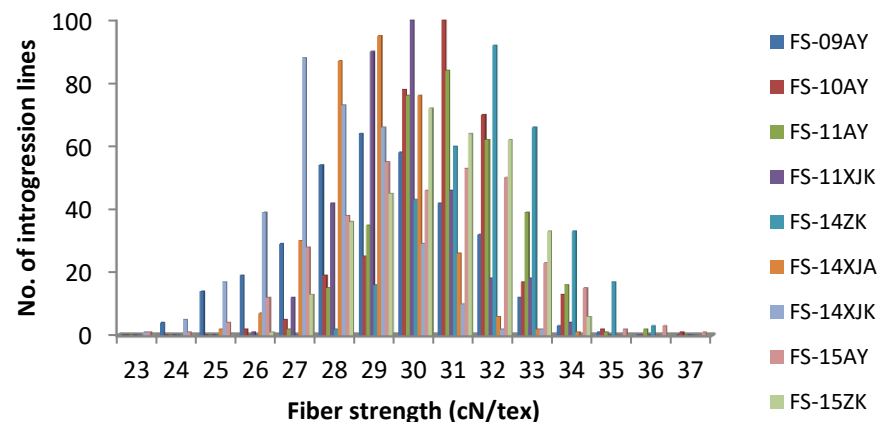**36Pop**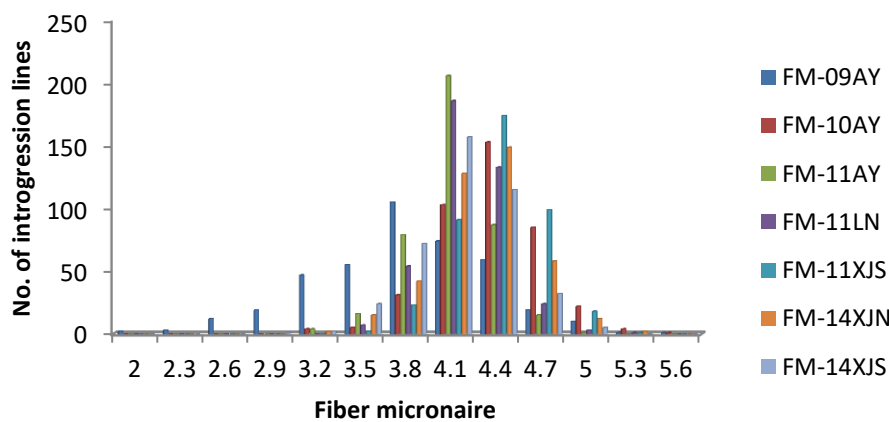**45Pop**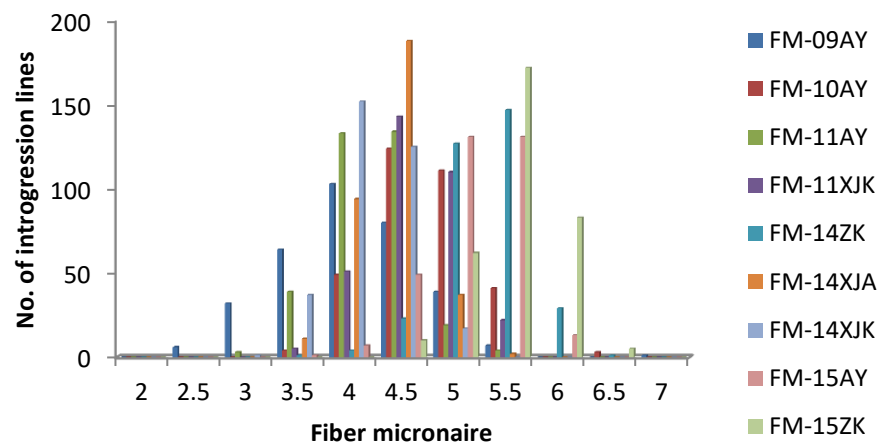

Supplement: 122_2020_3578_MOESM1_ESM.pdf [file 122_2020_3578_MOESM1_ESM.pdf]
