# Supplementary material for: Examining two sets of introgression lines across multiple environments reveals background-independent and stably expressed quantitative trait loci of fiber quality in cotton
Source: PubMed Central journal article supplement (PMC7311500; doi:10.1007/s00122-020-03578-0), 2020-03-17
Supplement: 122_2020_3578_MOESM3_ESM.pdf [file 122_2020_3578_MOESM3_ESM.pdf]

C1

C26

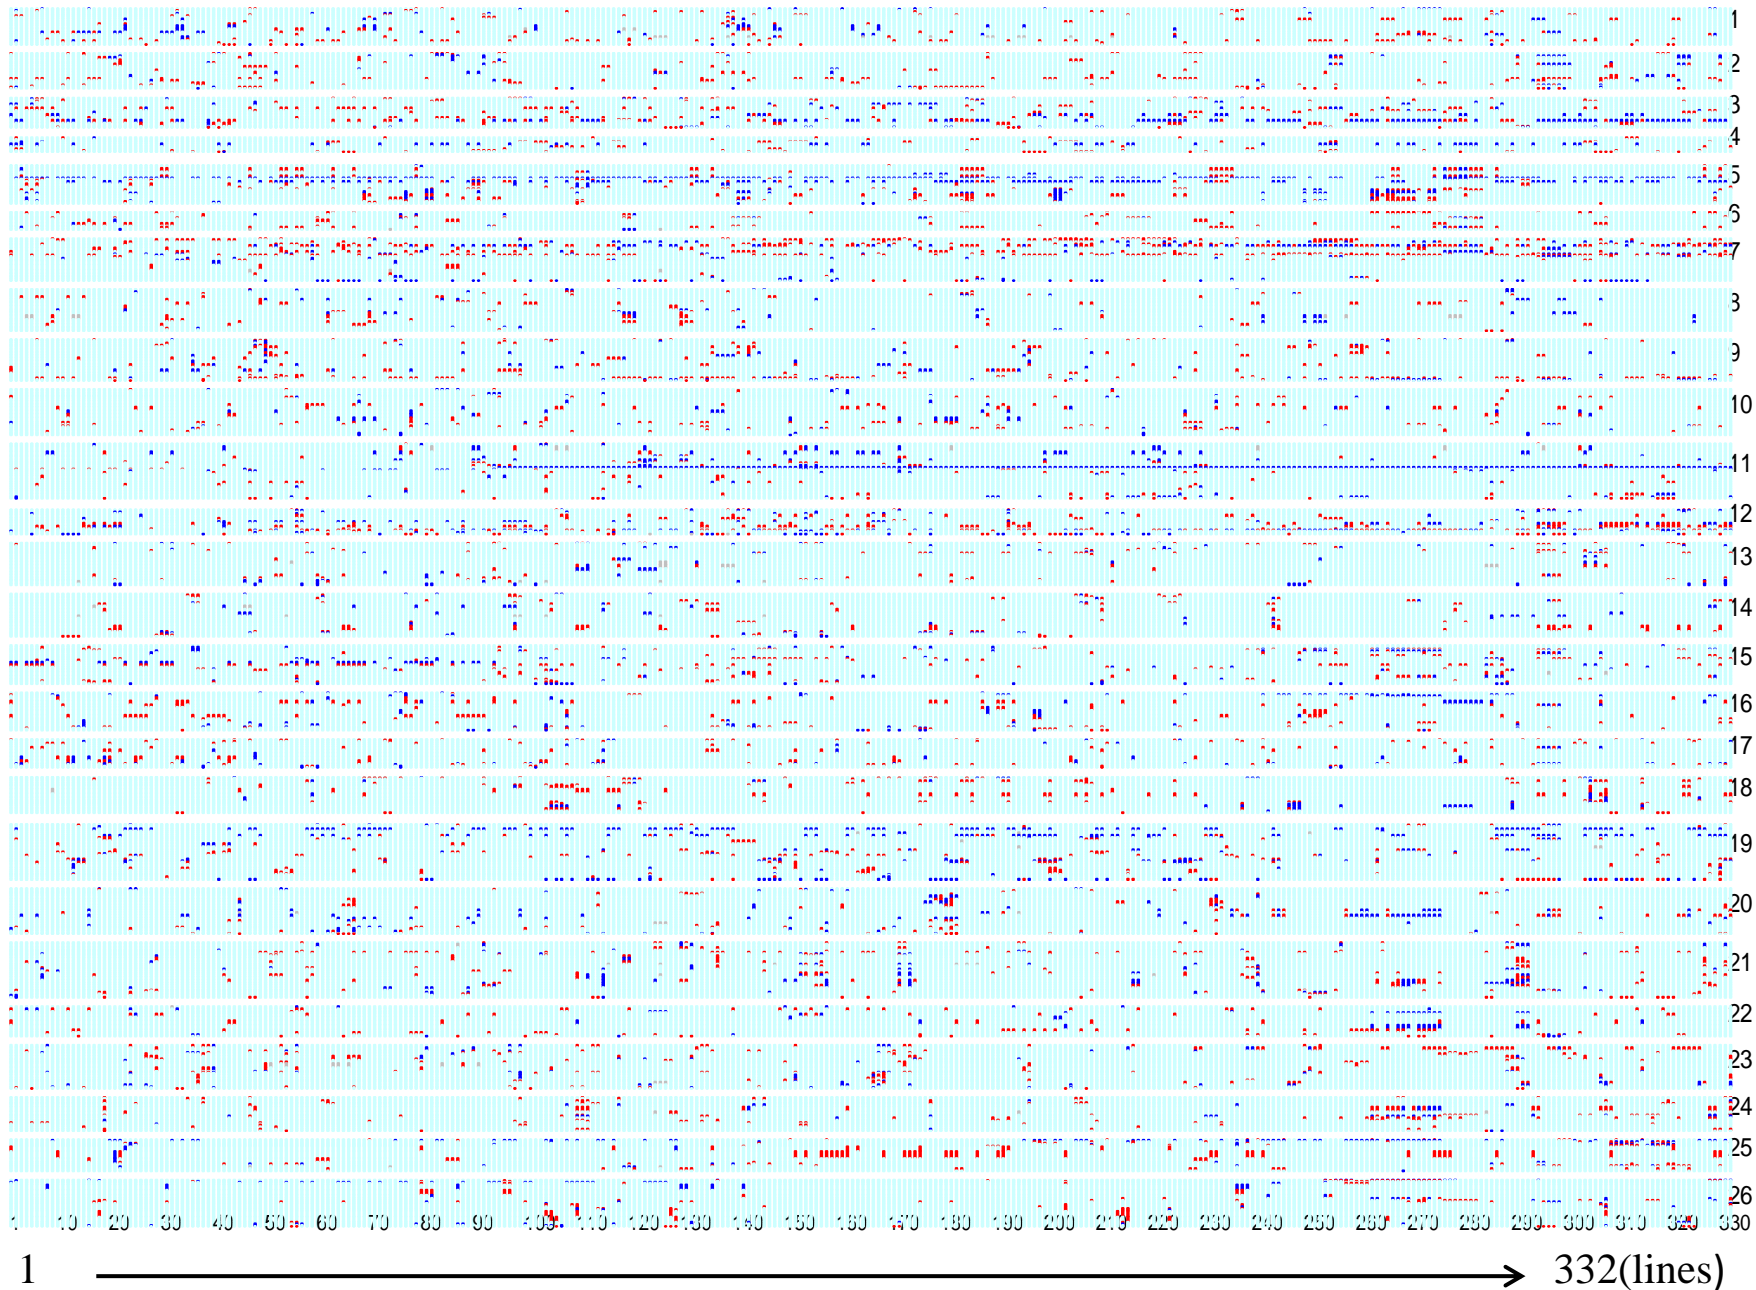

Legend  A  B  H  U
