# Supplementary material for: Examining two sets of introgression lines across multiple environments reveals background-independent and stably expressed quantitative trait loci of fiber quality in cotton
Source: PubMed Central journal article supplement (PMC7311500; doi:10.1007/s00122-020-03578-0), 2020-03-17
Supplement: 122_2020_3578_MOESM4_ESM.pdf [file 122_2020_3578_MOESM4_ESM.pdf]

**Table S1** Details of selected markers on the genetic linkage map of CCRI36 × Hai1 BC<sub>1</sub>F<sub>1</sub> population

| marker loci | Chromosome | Position | Selected marker |
|-------------|------------|----------|-----------------|
| HAU0887     | 1          | 0.00     | Yes             |
| DPL0833     | 1          | 2.71     |                 |
| HAU1619     | 1          | 4.84     | Yes             |
| CGR5524     | 1          | 6.97     |                 |
| CGR5417     | 1          | 10.76    | Yes             |
| HAU0282     | 1          | 13.60    |                 |
| Gh075       | 1          | 14.11    |                 |
| CGR5995     | 1          | 16.82    | Yes             |
| NAU5100     | 1          | 24.25    |                 |
| HAU0606     | 1          | 26.38    |                 |
| NAU4074     | 1          | 27.95    | Yes             |
| DC20076     | 1          | 29.53    |                 |
| HAU1229     | 1          | 30.03    |                 |
| TMB0119a    | 1          | 31.07    | Yes             |
| TMB1224a    | 1          | 31.68    |                 |
| TMB2544     | 1          | 34.29    |                 |
| BNL3888     | 1          | 34.29    |                 |
| MUSS310     | 1          | 37.29    | Yes             |
| CGR5853     | 1          | 40.30    |                 |
| DPL0094     | 1          | 40.30    |                 |
| DPL0692     | 1          | 42.73    |                 |
| NAU3744b    | 1          | 45.15    | Yes             |
| PGML00665   | 1          | 47.28    |                 |
| DPL0023b    | 1          | 47.79    |                 |
| DPL0109a    | 1          | 48.04    |                 |
| DPL0386     | 1          | 51.06    |                 |
| CICR0256    | 1          | 53.48    |                 |
| DPL0513     | 1          | 53.48    |                 |
| JESPR056b   | 1          | 55.33    | Yes             |
| Gh649b      | 1          | 55.58    |                 |
| PGML00698   | 1          | 58.89    |                 |
| MUCS084     | 1          | 70.29    | Yes             |
| Gh216       | 1          | 77.38    |                 |
| BNL2921     | 1          | 77.98    | Yes             |
| CGR6870     | 1          | 90.23    | Yes             |
| TMB1421     | 1          | 107.29   |                 |
| CGR6378     | 1          | 107.57   | Yes             |
| PGML01081   | 1          | 110.57   |                 |
| CGR6356     | 1          | 118.79   |                 |
| TMB1152b    | 1          | 122.66   | Yes             |
| CICR0894    | 1          | 125.98   |                 |
| NAU5411     | 1          | 126.49   |                 |
| NAU5163     | 1          | 126.74   |                 |
| CGR5056b    | 1          | 131.66   | Yes             |
| DPL0752     | 1          | 136.57   |                 |
| PGML0280    | 1          | 145.63   | Yes             |
| CGR6803a    | 1          | 150.21   |                 |
| CGR6803c    | 1          | 152.93   |                 |
| CICR0105    | 1          | 153.69   |                 |
| CICR0179    | 1          | 153.69   |                 |
| NAU2095     | 1          | 154.73   | Yes             |
| CGR5326b    | 1          | 155.76   |                 |
| DPL0346b    | 1          | 162.13   | Yes             |
| SWU0280a    | 1          | 170.93   |                 |
| BNL2440     | 1          | 175.54   | Yes             |
| CGR5020     | 1          | 178.29   |                 |
| NAU3901     | 1          | 182.22   | Yes             |
| NAU3535     | 2          | 0.00     | Yes             |

|            |   |        |     |
|------------|---|--------|-----|
| PGML02861a | 2 | 8.99   | Yes |
| DPL0450    | 2 | 12.08  |     |
| PGML04760  | 2 | 14.80  |     |
| BNL1434    | 2 | 15.12  | Yes |
| CGR5250    | 2 | 16.79  |     |
| PGML01061  | 2 | 18.10  |     |
| CER0058    | 2 | 23.53  | Yes |
| TMB2386    | 2 | 29.79  |     |
| BNL1897    | 2 | 39.33  | Yes |
| DC40265    | 2 | 43.60  |     |
| CGR5876a   | 2 | 44.92  |     |
| CICR0930   | 2 | 47.64  |     |
| TMB1578    | 2 | 50.01  | Yes |
| DPL0315    | 2 | 51.32  |     |
| HAU1980b   | 2 | 54.78  | Yes |
| Gh669      | 2 | 54.78  |     |
| SHIN-1481a | 2 | 58.62  |     |
| CGR6716a   | 2 | 58.95  |     |
| CGR6729a   | 2 | 59.27  |     |
| DPL0004    | 2 | 61.63  |     |
| DPL0539    | 2 | 64.35  |     |
| MUSS294    | 2 | 65.33  |     |
| NAU5134    | 2 | 67.34  |     |
| CICR0239   | 2 | 69.35  |     |
| BNL3590    | 2 | 72.44  | Yes |
| JESPR101a  | 2 | 72.44  |     |
| BNL3971    | 2 | 74.10  |     |
| NAU2501    | 2 | 74.10  |     |
| PGML03028  | 2 | 78.33  |     |
| NAU3875    | 2 | 79.99  | Yes |
| DPL0041    | 2 | 84.88  | Yes |
| TMB0471    | 2 | 92.83  |     |
| HAU2132    | 2 | 100.06 | Yes |
| Gh198a     | 2 | 103.15 |     |
| TMB0514    | 2 | 103.15 |     |
| PGML03818  | 2 | 105.15 |     |
| NAU1072    | 2 | 110.58 |     |
| CGR5201b   | 2 | 118.16 | Yes |
| CGR5385    | 2 | 127.16 |     |
| SHIN-1584  | 2 | 129.18 |     |
| CICR0800   | 2 | 129.83 | Yes |
| CICR0489   | 2 | 130.81 |     |
| HAU1155    | 2 | 132.47 |     |
| HAU0880    | 2 | 137.50 | Yes |
| HAU2690    | 2 | 145.56 |     |
| DPL0245a   | 2 | 149.78 |     |
| HAU1475    | 2 | 154.42 | Yes |
| TMB1580    | 2 | 159.08 | Yes |
| HAU2001    | 2 | 164.53 | Yes |
| HAU0800b   | 2 | 165.85 |     |
| NAU3775    | 2 | 166.83 |     |
| HAU3182    | 2 | 169.92 | Yes |
| NAU1246    | 2 | 171.24 |     |
| HAU0877    | 2 | 172.56 |     |
| NAU2277    | 2 | 178.82 | Yes |
| CICR0764   | 3 | 0.00   |     |
| HAU0883b   | 3 | 2.70   |     |
| NAU0833    | 3 | 3.42   |     |
| NAU5289    | 3 | 3.56   | Yes |
| DPL0502b   | 3 | 4.42   |     |
| HAU0263    | 3 | 4.85   |     |

|            |   |        |     |
|------------|---|--------|-----|
| CIR084     | 3 | 5.39   |     |
| HAU2024    | 3 | 5.55   |     |
| NAU3464    | 3 | 8.54   | Yes |
| DC40396    | 3 | 11.35  |     |
| DPL0921    | 3 | 13.60  |     |
| HAU0857    | 3 | 17.01  | Yes |
| HAU0875    | 3 | 17.87  |     |
| HAU1322    | 3 | 18.59  |     |
| HAU0203    | 3 | 19.76  |     |
| CGR5996    | 3 | 19.76  |     |
| Gh210      | 3 | 19.76  |     |
| TMB1989    | 3 | 20.48  | Yes |
| PGML04299  | 3 | 22.47  |     |
| CGR6874    | 3 | 23.92  |     |
| DPL0195a   | 3 | 24.53  |     |
| HAU2511    | 3 | 25.10  |     |
| CICR0417   | 3 | 25.97  |     |
| DPL0268    | 3 | 26.54  | Yes |
| SHIN-0659a | 3 | 27.56  |     |
| HAU3185    | 3 | 29.90  |     |
| MGHES69    | 3 | 32.25  |     |
| NAU5469    | 3 | 33.27  |     |
| CICR0376   | 3 | 34.93  |     |
| DC40402    | 3 | 35.79  |     |
| DC20082    | 3 | 36.81  |     |
| DC40064    | 3 | 37.24  |     |
| MUSS424    | 3 | 37.52  | Yes |
| PGML01520  | 3 | 39.23  |     |
| DPL0038    | 3 | 41.51  |     |
| CGR5466    | 3 | 42.38  |     |
| BNL0542    | 3 | 44.64  |     |
| PGML04787  | 3 | 47.65  | Yes |
| DPL0680    | 3 | 53.63  |     |
| CICR0437   | 3 | 56.90  |     |
| NAU1190    | 3 | 57.62  | Yes |
| CICR0222   | 3 | 58.80  |     |
| Gh129      | 3 | 60.13  |     |
| DPL0170    | 3 | 63.02  |     |
| CGR6728b   | 3 | 66.88  |     |
| DPL0427b   | 3 | 67.80  |     |
| DC20155    | 3 | 69.45  |     |
| TMB0564    | 3 | 71.56  | Yes |
| DPL0506    | 3 | 72.80  |     |
| NAU0856    | 3 | 74.79  | Yes |
| SWU1214    | 3 | 76.79  |     |
| DPL0842    | 3 | 78.78  |     |
| NAU2639    | 3 | 80.77  |     |
| HAU0604    | 3 | 80.91  |     |
| DPL0555    | 3 | 81.48  |     |
| DPL0901    | 3 | 85.36  |     |
| CICR0121   | 3 | 90.73  |     |
| MUSB0087   | 3 | 93.70  | Yes |
| PGML03765  | 3 | 95.19  |     |
| NAU1294    | 3 | 96.06  |     |
| HAU1286    | 3 | 96.48  |     |
| BNL3441    | 3 | 96.97  |     |
| CER0028    | 3 | 97.48  |     |
| DPL0232    | 3 | 99.83  |     |
| PGML03195  | 3 | 103.51 |     |
| TMB1898    | 3 | 105.01 |     |
| HAU1022    | 3 | 105.29 | Yes |

|            |   |        |     |
|------------|---|--------|-----|
| BNL2443    | 3 | 106.78 |     |
| DPL0224    | 3 | 107.21 |     |
| CICR0034   | 3 | 108.54 |     |
| NAU3479    | 3 | 111.06 |     |
| HAU0912    | 3 | 111.78 |     |
| NAU2297    | 3 | 112.35 | Yes |
| HAU1396    | 3 | 113.84 |     |
| PGML02906  | 3 | 113.84 |     |
| DPL0321    | 3 | 114.12 |     |
| HAU0195b   | 3 | 114.40 | Yes |
| CGR6873    | 3 | 114.83 |     |
| CGR6528    | 3 | 115.11 |     |
| DPL0291    | 3 | 118.25 |     |
| HAU3403    | 3 | 128.02 | Yes |
| PGML00950b | 3 | 134.54 |     |
| NAU3016a   | 3 | 141.35 | Yes |
| PGML03307  | 3 | 145.85 |     |
| HAU0292    | 3 | 146.63 | Yes |
| HAU0759    | 3 | 148.57 | Yes |
| CGR5620    | 3 | 150.74 |     |
| CGR5729    | 3 | 151.03 |     |
| NAU3083    | 3 | 153.72 | Yes |
| MUCS547    | 3 | 166.15 |     |
| DPL0573    | 4 | 0.00   |     |
| CICR0640   | 4 | 5.73   |     |
| MUSB0264   | 4 | 6.40   | Yes |
| NAU2701    | 4 | 7.22   |     |
| HAU3050b   | 4 | 14.75  |     |
| DPL0137a   | 4 | 23.61  | Yes |
| NAU1158    | 4 | 26.12  | Yes |
| CICR0020   | 4 | 26.83  |     |
| HAU1444    | 4 | 27.23  |     |
| NAU0786    | 4 | 28.82  | Yes |
| CGR5812    | 4 | 31.37  |     |
| TMB0809    | 4 | 32.18  |     |
| NAU3825    | 4 | 32.18  |     |
| CGR5252    | 4 | 32.18  |     |
| DC40436    | 4 | 32.45  |     |
| NAU5180    | 4 | 33.41  |     |
| DC40149    | 4 | 36.16  |     |
| DPL0685    | 4 | 44.93  | Yes |
| PGML02232  | 4 | 55.27  | Yes |
| DPL0107a   | 4 | 61.61  | Yes |
| HAU3228    | 4 | 63.09  |     |
| DPL0704    | 4 | 64.35  |     |
| HAU1300    | 4 | 65.45  |     |
| DPL0085    | 4 | 66.71  | Yes |
| NAU2363    | 4 | 69.09  |     |
| HAU1215    | 4 | 70.05  |     |
| Gh117      | 4 | 73.91  | Yes |
| NAU3093    | 4 | 77.37  | Yes |
| HAU2016    | 4 | 77.50  |     |
| DPL0451    | 4 | 78.46  |     |
| HAU0101    | 4 | 80.03  | Yes |
| CICR0345   | 4 | 81.28  |     |
| BNL2572    | 4 | 81.68  |     |
| CICR0267   | 4 | 83.09  |     |
| MUCS570    | 4 | 85.82  |     |
| NAU5236    | 4 | 90.32  |     |
| CER0139a   | 4 | 90.72  |     |
| DPL0014    | 5 | 0.00   |     |

|            |   |        |     |
|------------|---|--------|-----|
| PGML04317  | 5 | 9.85   |     |
| PGML04350a | 5 | 15.15  |     |
| COT130     | 5 | 18.71  | Yes |
| DPL0247a   | 5 | 25.61  | Yes |
| CIR224b    | 5 | 30.46  | Yes |
| PGML03048  | 5 | 31.31  |     |
| CIR102     | 5 | 32.29  |     |
| DC20067    | 5 | 32.43  |     |
| NAU4034    | 5 | 32.43  |     |
| BNL1042    | 5 | 32.56  |     |
| DPL0063    | 5 | 35.37  |     |
| HAU0746    | 5 | 38.17  |     |
| TMB1296    | 5 | 38.17  |     |
| CGR6708a   | 5 | 38.58  |     |
| DPL0724    | 5 | 38.99  |     |
| TMB1120    | 5 | 39.12  |     |
| CGR5590    | 5 | 39.39  |     |
| PGML02063  | 5 | 39.80  |     |
| CGR5025    | 5 | 40.21  |     |
| DPL0022    | 5 | 41.66  |     |
| HAU1712    | 5 | 43.10  |     |
| MGHES06    | 5 | 43.94  |     |
| DPL0838    | 5 | 44.64  |     |
| NAU2494    | 5 | 44.77  |     |
| DPL0138    | 5 | 45.04  |     |
| DPL0241    | 5 | 47.41  | Yes |
| NAU1372    | 5 | 49.00  |     |
| CGR6247    | 5 | 50.21  |     |
| HAU1030    | 5 | 50.34  |     |
| DC30048    | 5 | 50.48  |     |
| HAU0871    | 5 | 50.75  |     |
| NAU1109    | 5 | 50.88  |     |
| NAU0922    | 5 | 50.88  |     |
| CICR0065b  | 5 | 51.58  |     |
| DPL0368    | 5 | 53.18  | Yes |
| DPL0554    | 5 | 58.99  |     |
| DC40122    | 5 | 60.77  |     |
| CIR139b    | 5 | 61.37  |     |
| MUCS530    | 5 | 64.32  | Yes |
| HAU1034    | 5 | 67.28  |     |
| NAU5160    | 5 | 67.71  |     |
| HAU0869    | 5 | 69.48  | Yes |
| NAU3325    | 5 | 70.46  |     |
| CGR5582    | 5 | 72.39  |     |
| DPL0210b   | 5 | 75.61  |     |
| NAU3416    | 5 | 82.36  | Yes |
| MUSS317    | 5 | 89.92  | Yes |
| MUSS118    | 5 | 94.09  | Yes |
| MUCS108    | 5 | 94.36  |     |
| NAU0826    | 5 | 94.36  |     |
| NAU1015    | 5 | 94.49  |     |
| HAU2785    | 5 | 96.76  |     |
| DPL0040b   | 5 | 97.03  |     |
| NAU1339    | 5 | 97.44  |     |
| CICR0111   | 5 | 98.28  |     |
| BNL2448    | 5 | 100.04 | Yes |
| DPL0155a   | 5 | 100.04 |     |
| CGR5135    | 5 | 100.88 |     |
| BNL3992    | 5 | 102.48 |     |
| HAU1500    | 5 | 104.52 |     |
| TMB0131b   | 5 | 105.87 |     |

|           |   |        |     |
|-----------|---|--------|-----|
| DPL0246   | 5 | 107.16 |     |
| HAU1384   | 5 | 107.86 | Yes |
| HAU1385a  | 5 | 109.15 |     |
| Gh083     | 5 | 112.70 |     |
| HAU3395   | 5 | 119.29 |     |
| DPL0384   | 5 | 123.29 | Yes |
| MGHES59   | 5 | 126.55 |     |
| BNL0226   | 5 | 130.70 |     |
| DPL0174b  | 5 | 135.59 |     |
| HAU1976   | 5 | 139.21 |     |
| HAU0506   | 5 | 139.35 | Yes |
| NAU2957   | 5 | 141.28 | Yes |
| HAU1957   | 5 | 141.55 |     |
| SWU0916   | 5 | 145.30 |     |
| DC20163   | 5 | 147.92 |     |
| Gh594     | 5 | 149.21 | Yes |
| Gh211     | 5 | 149.76 |     |
| CGR6733   | 5 | 151.05 |     |
| HAU1404   | 5 | 152.03 |     |
| DPL0908a  | 5 | 153.80 |     |
| HAU0215   | 5 | 156.79 |     |
| NAU3824a  | 5 | 158.09 | Yes |
| BNL3995   | 5 | 159.84 |     |
| NAU1127   | 5 | 159.98 |     |
| DPL0637   | 5 | 160.25 |     |
| Gh166b    | 5 | 160.66 |     |
| DPL0327   | 5 | 161.54 |     |
| CIR301    | 5 | 164.47 |     |
| DPL0276   | 5 | 165.02 |     |
| NAU2001   | 5 | 165.30 | Yes |
| CICR0496  | 5 | 165.71 |     |
| NAU1200   | 5 | 166.40 |     |
| COT010    | 5 | 167.39 |     |
| HAU3350b  | 5 | 167.94 |     |
| CGR5925a  | 5 | 168.63 |     |
| DPL0622   | 5 | 169.18 |     |
| NAU2296b  | 5 | 172.74 | Yes |
| NAU2296a  | 5 | 174.50 | Yes |
| NAU3138   | 5 | 181.66 |     |
| HAU1496   | 5 | 196.86 |     |
| NAU3036   | 5 | 197.41 | Yes |
| HAU1050   | 5 | 197.41 |     |
| PGML00939 | 5 | 199.34 |     |
| CIR253    | 5 | 201.60 |     |
| TMB0770a  | 5 | 202.44 | Yes |
| TMB0770b  | 5 | 202.44 |     |
| NAU5400   | 5 | 203.43 |     |
| SWU1250   | 5 | 204.57 |     |
| NAU3402   | 5 | 205.12 | Yes |
| CGR5553   | 5 | 209.95 | Yes |
| PGML00120 | 5 | 209.95 |     |
| NAU2948   | 5 | 218.04 | Yes |
| NAU5038   | 6 | 0.00   | Yes |
| DPL0328   | 6 | 1.19   | Yes |
| NAU3173   | 6 | 1.76   |     |
| CGR5271   | 6 | 2.37   |     |
| CGR5128b  | 6 | 3.92   |     |
| NAU2967   | 6 | 4.03   |     |
| TMB0853   | 6 | 4.37   |     |
| TMB0154   | 6 | 4.37   |     |
| PGML04263 | 6 | 4.94   |     |

|           |   |       |     |
|-----------|---|-------|-----|
| TMB1538   | 6 | 5.45  |     |
| Gh032     | 6 | 5.62  |     |
| NAU0796   | 6 | 5.62  |     |
| DPL0222   | 6 | 11.53 |     |
| CGR6932b  | 6 | 14.62 |     |
| NAU4969   | 6 | 14.73 |     |
| CGR5525b  | 6 | 15.31 |     |
| HAU0964   | 6 | 16.00 |     |
| DC40067   | 6 | 17.07 |     |
| COT002    | 6 | 18.26 | Yes |
| DPL0918a  | 6 | 18.71 |     |
| DPL0166b  | 6 | 20.87 |     |
| DPL0847   | 6 | 22.33 | Yes |
| DPL0427a  | 6 | 22.90 |     |
| CGR6749   | 6 | 23.47 |     |
| HAU3308   | 6 | 24.04 |     |
| PGML04892 | 6 | 24.86 |     |
| DPL0153   | 6 | 27.95 |     |
| Gh082     | 6 | 29.82 | Yes |
| BNL1440b  | 6 | 31.10 | Yes |
| HAU2447   | 6 | 31.85 |     |
| HAU3350a  | 6 | 36.62 |     |
| DPL0142   | 6 | 38.35 |     |
| DPL0697a  | 6 | 40.80 |     |
| BNL4108   | 6 | 42.26 |     |
| TMB2959   | 6 | 42.26 |     |
| CER0093   | 6 | 42.26 |     |
| TMB1277   | 6 | 42.26 |     |
| HAU1488   | 6 | 42.26 |     |
| NAU2838   | 6 | 42.26 |     |
| HAU0091   | 6 | 42.49 |     |
| NAU0905a  | 6 | 42.82 | Yes |
| HAU1293   | 6 | 43.05 |     |
| DPL0392   | 6 | 43.27 |     |
| CGR5562   | 6 | 43.27 |     |
| CGR6814   | 6 | 43.27 |     |
| CER0086a  | 6 | 44.46 |     |
| PGML00996 | 6 | 45.92 |     |
| C2-0009B  | 6 | 46.61 |     |
| CGR6019   | 6 | 49.27 |     |
| PGML01861 | 6 | 54.15 | Yes |
| DC40417   | 6 | 55.00 |     |
| CGR5355   | 6 | 55.22 |     |
| CICR0461b | 6 | 57.59 |     |
| CGR5883   | 6 | 61.14 |     |
| CICR0824  | 6 | 64.58 |     |
| HAU2822   | 6 | 65.27 |     |
| NAU5433   | 6 | 66.09 | Yes |
| PGML03066 | 6 | 66.66 |     |
| HAU0210   | 6 | 67.98 |     |
| NAU2968   | 6 | 68.79 |     |
| NAU3803b  | 6 | 69.02 |     |
| NAU4946   | 6 | 69.47 | Yes |
| BNL3650   | 6 | 70.32 |     |
| DPL0257b  | 6 | 72.60 |     |
| PGML03094 | 6 | 73.06 |     |
| C2-0139   | 6 | 73.40 |     |
| DPL0613   | 6 | 77.19 | Yes |
| DPL0705a  | 6 | 90.01 | Yes |
| SWU0473   | 7 | 0.00  | Yes |
| DPL0364b  | 7 | 5.34  |     |

|            |   |        |     |
|------------|---|--------|-----|
| CGR5119    | 7 | 8.61   | Yes |
| PGML04198  | 7 | 22.72  | Yes |
| NAU4030    | 7 | 29.18  | Yes |
| NAU3581    | 7 | 30.79  |     |
| HAU1279    | 7 | 31.01  |     |
| SHIN-1585  | 7 | 33.38  |     |
| NAU5303    | 7 | 33.82  |     |
| HAU1367    | 7 | 38.10  | Yes |
| NAU3654    | 7 | 38.32  |     |
| NAU5152    | 7 | 43.82  |     |
| SHIN-1405a | 7 | 46.44  |     |
| SWU1338    | 7 | 49.87  |     |
| SHIN-0376a | 7 | 52.71  |     |
| PGML01950  | 7 | 53.19  | Yes |
| CGR5001a   | 7 | 53.86  |     |
| HAU3319    | 7 | 54.08  |     |
| CGR6512    | 7 | 55.73  |     |
| NAU2886    | 7 | 65.15  |     |
| COT048b    | 7 | 70.92  |     |
| CGR5372    | 7 | 71.87  |     |
| MUSS063    | 7 | 72.31  |     |
| NAU5120b   | 7 | 73.69  | Yes |
| DPL0136    | 7 | 74.82  |     |
| CGR6894b   | 7 | 75.49  |     |
| NAU1048    | 7 | 77.11  | Yes |
| CICR0375   | 7 | 80.82  |     |
| CICR0226   | 7 | 83.44  |     |
| NAU2002    | 7 | 85.06  | Yes |
| COT096a    | 7 | 87.42  |     |
| CGR6381    | 7 | 88.09  |     |
| NAU3028    | 7 | 88.54  |     |
| NAU1085    | 7 | 92.24  | Yes |
| HAU2346    | 7 | 92.46  |     |
| CICR0651   | 7 | 92.68  |     |
| HAU1763    | 7 | 92.90  |     |
| HAU3273    | 7 | 93.13  |     |
| HAU1483    | 7 | 93.35  |     |
| DC40253    | 7 | 102.67 | Yes |
| HAU1754    | 7 | 109.34 | Yes |
| CGR5691    | 7 | 111.21 |     |
| CGR6061    | 7 | 111.21 |     |
| HAU1780    | 7 | 113.32 |     |
| CIR141     | 7 | 115.18 | Yes |
| CICR0224   | 7 | 115.86 |     |
| CICR0287   | 7 | 117.23 |     |
| BNL1694    | 7 | 117.90 |     |
| CMO60      | 7 | 118.12 |     |
| CICR0680   | 7 | 118.34 |     |
| CGR5080    | 7 | 119.71 |     |
| TMB2844    | 7 | 120.16 |     |
| MUSB0691   | 7 | 121.06 |     |
| PGML04271a | 7 | 124.21 |     |
| TMB0561    | 7 | 129.14 | Yes |
| PGML03933  | 7 | 148.04 | Yes |
| DPL0661    | 7 | 165.08 | Yes |
| DC20152    | 7 | 174.65 | Yes |
| CGR6815    | 7 | 175.79 |     |
| NAU6202    | 7 | 175.79 |     |
| NAU5458    | 7 | 176.46 |     |
| HAU3298    | 7 | 178.08 |     |
| MUSB0441   | 7 | 184.91 | Yes |



|            |   |        |     |
|------------|---|--------|-----|
| Gh506      | 7 | 190.40 | Yes |
| CICR0399   | 7 | 190.85 |     |
| PGML03165a | 7 | 191.38 |     |
| DPL0652    | 7 | 192.19 |     |
| HAU0597    | 7 | 193.56 |     |
| DPL0920b   | 7 | 194.23 |     |
| HAU1172    | 7 | 196.09 | Yes |
| DC30150    | 7 | 196.54 |     |
| Gh548      | 7 | 197.91 |     |
| CGR5138    | 7 | 206.15 |     |
| NAU4082    | 7 | 207.31 |     |
| NAU2308    | 7 | 208.21 | Yes |
| PGML03114  | 7 | 209.58 |     |
| PGML01916  | 7 | 212.76 | Yes |
| NAU3324a   | 8 | 0.00   | Yes |
| HAU1899    | 8 | 5.63   | Yes |
| DPL0749    | 8 | 6.73   |     |
| SHIN-0153  | 8 | 13.94  |     |
| HAU1782a   | 8 | 16.29  | Yes |
| CGR5759    | 8 | 17.85  |     |
| NAU1209    | 8 | 23.49  | Yes |
| PGML01348  | 8 | 23.71  |     |
| HAU1308    | 8 | 23.71  |     |
| CICR0492   | 8 | 24.14  |     |
| NAU2293    | 8 | 24.14  |     |
| NAU0839    | 8 | 24.14  |     |
| HAU1607    | 8 | 25.01  |     |
| BNL3627b   | 8 | 25.92  |     |
| DPL0841a   | 8 | 30.90  | Yes |
| DPL0111    | 8 | 36.14  |     |
| CGR5145    | 8 | 38.52  |     |
| HAU1390    | 8 | 38.94  | Yes |
| PGML03354  | 8 | 39.59  |     |
| CGR6748    | 8 | 40.46  |     |
| DPL0154    | 8 | 41.79  |     |
| CGR5359    | 8 | 45.10  |     |
| DPL0862    | 8 | 49.54  |     |
| HAU1749    | 8 | 54.56  |     |
| CGR5537    | 8 | 56.12  |     |
| PGML0270   | 8 | 56.99  |     |
| TMB0029    | 8 | 57.53  |     |
| HAU1547    | 8 | 58.11  | Yes |
| DPL0589    | 8 | 61.91  | Yes |
| CGR5161    | 8 | 65.23  |     |
| HAU0709    | 8 | 65.23  |     |
| HAU1632    | 8 | 65.23  |     |
| PGML01704  | 8 | 66.10  |     |
| HAU3346a   | 8 | 67.42  |     |
| MUCS148    | 8 | 67.42  |     |
| NAU6213    | 8 | 67.85  |     |
| BNL3257    | 8 | 68.50  |     |
| BNL3792    | 8 | 68.71  |     |
| Gh198b     | 8 | 69.81  |     |
| CER0152b   | 8 | 71.64  | Yes |
| CER0152c   | 8 | 77.66  |     |
| HAU2086a   | 8 | 92.72  | Yes |
| NAU4978    | 8 | 105.83 |     |
| Gh634      | 8 | 107.16 |     |
| HAU1773    | 8 | 108.96 | Yes |
| TMB1190    | 8 | 110.71 | Yes |
| CER0099    | 8 | 111.43 |     |

|            |   |        |     |
|------------|---|--------|-----|
| CICR0542   | 8 | 112.75 |     |
| NAU1164    | 8 | 112.75 |     |
| TMB2107    | 8 | 112.75 |     |
| CGR5363    | 8 | 112.97 |     |
| CGR5311    | 8 | 113.61 |     |
| HAU2832    | 8 | 114.71 |     |
| HAU3211    | 8 | 116.51 |     |
| MUSB0780   | 8 | 117.16 |     |
| DPL0861    | 8 | 118.26 |     |
| HAU2015a   | 8 | 120.55 | Yes |
| STV028     | 8 | 139.83 | Yes |
| HAU2319    | 8 | 152.12 |     |
| NAU4934    | 8 | 155.17 |     |
| DC40028    | 8 | 157.60 |     |
| CER0029    | 8 | 158.80 | Yes |
| DPL0214a   | 8 | 160.84 | Yes |
| HAU0520    | 8 | 163.63 |     |
| CICR0953b  | 8 | 164.96 |     |
| NAU3201b   | 8 | 166.52 |     |
| BNL3255    | 8 | 167.17 |     |
| COT065     | 8 | 167.17 |     |
| HAU3003    | 8 | 167.17 |     |
| HAU1739    | 8 | 167.81 |     |
| PGML04154b | 8 | 169.14 |     |
| JESPR092   | 8 | 178.30 |     |
| CGR5172    | 8 | 184.75 | Yes |
| NAU0779    | 8 | 186.49 |     |
| NAU2407    | 8 | 186.97 |     |
| NAU1017    | 8 | 187.84 |     |
| CGR5130    | 8 | 189.88 | Yes |
| PGML03602  | 8 | 193.46 |     |
| JESPR232   | 8 | 195.51 |     |
| HAU1181    | 8 | 195.94 | Yes |
| PGML00102  | 8 | 196.59 |     |
| DPL0353    | 8 | 203.52 | Yes |
| SHIN-1494a | 8 | 209.79 | Yes |
| CGR5521    | 8 | 210.43 |     |
| DPL0152b   | 8 | 216.70 |     |
| DPL0238    | 9 | 0.00   | Yes |
| NAU5468    | 9 | 5.14   | Yes |
| BNL0686b   | 9 | 6.05   |     |
| HAU3052    | 9 | 6.62   |     |
| HAU2496    | 9 | 8.59   |     |
| NAU3888b   | 9 | 9.22   | Yes |
| NAU3538    | 9 | 10.06  |     |
| Gh486      | 9 | 12.04  |     |
| CGR6170    | 9 | 19.08  |     |
| NAU6418    | 9 | 21.31  |     |
| PGML02974  | 9 | 24.03  | Yes |
| NAU3101    | 9 | 26.24  |     |
| DPL0679    | 9 | 29.19  | Yes |
| PGML03817  | 9 | 34.70  |     |
| BNL1162    | 9 | 37.35  |     |
| PGML04210  | 9 | 38.64  |     |
| NAU2575    | 9 | 39.26  | Yes |
| Gh098      | 9 | 39.26  |     |
| DPL0697b   | 9 | 41.29  |     |
| DPL0783    | 9 | 49.20  |     |
| MUSS432    | 9 | 57.94  | Yes |
| MUSB0009   | 9 | 61.14  |     |
| Gh584      | 9 | 61.77  |     |

|            |    |        |     |
|------------|----|--------|-----|
| Gh111      | 9  | 61.97  |     |
| NAU5017    | 9  | 61.97  |     |
| Gh112      | 9  | 69.55  | Yes |
| DPL0171    | 9  | 85.29  | Yes |
| NAU0817    | 9  | 95.73  | Yes |
| TMB0184    | 9  | 97.18  |     |
| HAU0792    | 9  | 98.60  |     |
| HAU2810    | 9  | 104.35 |     |
| BNL3779    | 9  | 109.40 |     |
| HAU2730b   | 9  | 109.89 |     |
| BNL1672    | 9  | 112.56 |     |
| BNL3031    | 9  | 113.18 |     |
| HAU1966    | 9  | 114.52 | Yes |
| CICR0334   | 9  | 116.26 |     |
| STV177     | 9  | 117.10 |     |
| HAU0361    | 9  | 130.53 |     |
| PGML01868c | 9  | 132.79 | Yes |
| NAU0805    | 9  | 140.49 | Yes |
| HAU3218b   | 9  | 157.89 | Yes |
| Gh495      | 9  | 167.15 |     |
| CGR6252a   | 9  | 169.60 |     |
| CGR6921    | 9  | 171.25 |     |
| CGR6072    | 9  | 171.75 |     |
| COT151     | 9  | 172.16 |     |
| NAU2211    | 9  | 173.67 |     |
| BNL3582    | 9  | 174.41 | Yes |
| DPL0850    | 9  | 174.93 |     |
| CGR5128a   | 9  | 175.77 |     |
| CGR5110    | 9  | 176.83 |     |
| CGR6719    | 9  | 177.46 |     |
| MUCS426    | 9  | 180.32 | Yes |
| MUSS397    | 9  | 181.94 |     |
| Gh247      | 9  | 182.78 |     |
| BNL1317    | 9  | 183.04 |     |
| CGR5707    | 9  | 184.04 |     |
| NAU0882    | 9  | 184.04 |     |
| SHIN-0347  | 9  | 184.46 |     |
| NAU0877    | 9  | 185.31 |     |
| HAU3150    | 9  | 185.94 |     |
| CM071      | 9  | 187.45 |     |
| BNL1414    | 9  | 187.86 | Yes |
| SWU0124    | 9  | 188.07 |     |
| BNL1030    | 9  | 188.41 |     |
| NAU3365    | 9  | 189.11 |     |
| HAU1617    | 9  | 189.53 |     |
| CGR5426    | 9  | 190.59 |     |
| BNL2590    | 9  | 192.06 |     |
| HAU1683    | 9  | 193.17 | Yes |
| HAU0455    | 9  | 193.17 |     |
| CGR5292    | 9  | 194.04 |     |
| HAU0085    | 9  | 199.14 |     |
| DPL0524a   | 9  | 200.88 |     |
| PGML02558  | 9  | 203.58 |     |
| NAU2354    | 9  | 203.99 | Yes |
| DPL0514b   | 9  | 206.96 | Yes |
| DPL0317    | 10 | 0.00   | Yes |
| HAU0955    | 10 | 2.21   |     |
| PGML04510  | 10 | 5.63   |     |
| CICR0688   | 10 | 9.69   |     |
| CICR0002   | 10 | 9.69   |     |
| DPL0533    | 10 | 10.16  |     |

|            |    |        |     |
|------------|----|--------|-----|
| STV031     | 10 | 10.79  | Yes |
| CGR5565b   | 10 | 10.94  |     |
| CGR5399    | 10 | 10.94  |     |
| SWU1312    | 10 | 14.34  |     |
| DPL0297    | 10 | 24.36  |     |
| NAU5166    | 10 | 27.98  | Yes |
| CICR0886a  | 10 | 31.82  |     |
| CGR5406    | 10 | 31.97  |     |
| CICR0194   | 10 | 32.13  |     |
| NAU1066a   | 10 | 32.78  | Yes |
| HAU2873b   | 10 | 35.95  | Yes |
| DC20161    | 10 | 36.42  |     |
| NAU2271    | 10 | 36.42  |     |
| HAU0635    | 10 | 36.57  |     |
| PGML03513  | 10 | 37.53  |     |
| BNL1160    | 10 | 38.49  |     |
| PGML00058  | 10 | 39.28  |     |
| SHIN-0087a | 10 | 40.41  | Yes |
| HAU1423a   | 10 | 40.71  |     |
| JESPR056a  | 10 | 41.14  |     |
| DPL0485    | 10 | 41.84  |     |
| DPL0149    | 10 | 50.67  | Yes |
| NAU1066b   | 10 | 64.57  | Yes |
| Gh236      | 10 | 73.00  |     |
| DPL0310    | 10 | 81.52  |     |
| TMB1288    | 10 | 85.09  | Yes |
| BNL1665    | 10 | 85.27  |     |
| PGML04611b | 10 | 85.59  |     |
| DC40119    | 10 | 86.06  |     |
| CGR5717    | 10 | 86.21  |     |
| DPL0553    | 10 | 86.84  |     |
| DC40188    | 10 | 88.67  |     |
| DPL0468    | 10 | 91.66  | Yes |
| NAU6393    | 10 | 92.62  |     |
| NAU3682    | 10 | 94.09  |     |
| CM027      | 10 | 95.39  |     |
| TMB0380    | 10 | 96.09  |     |
| DPL0108    | 10 | 102.57 | Yes |
| SHIN-0783  | 10 | 111.24 |     |
| CGR5624    | 10 | 118.35 |     |
| CGR6839    | 10 | 119.48 |     |
| NAU0921    | 10 | 121.31 | Yes |
| HAU2009    | 10 | 122.11 |     |
| BNL1161    | 10 | 122.42 |     |
| CGR5873    | 10 | 122.42 |     |
| TMB0307    | 10 | 122.49 |     |
| SWU1259b   | 10 | 122.57 |     |
| DPL0165    | 10 | 125.76 | Yes |
| DPL0116a   | 10 | 132.16 |     |
| NAU2869    | 10 | 146.68 | Yes |
| HAU0230a   | 10 | 154.52 |     |
| PGML00696b | 10 | 157.72 | Yes |
| NAU4910    | 10 | 159.55 |     |
| CGR6818    | 10 | 161.03 |     |
| CIR166     | 10 | 164.49 |     |
| HAU1516b   | 10 | 169.85 | Yes |
| C2-0133a   | 10 | 176.46 |     |
| BNL3563    | 10 | 178.11 | Yes |
| HAU0949    | 10 | 178.42 |     |
| NAU1182    | 10 | 180.82 |     |
| NAU4008    | 10 | 181.77 |     |

|            |    |        |     |
|------------|----|--------|-----|
| NAU2082    | 10 | 182.24 |     |
| PGML04401  | 10 | 182.71 |     |
| MUSB0698   | 10 | 183.02 |     |
| NAU2911    | 10 | 183.49 | Yes |
| NAU2991    | 10 | 188.25 | Yes |
| PGML03148  | 10 | 194.88 |     |
| HAU1701    | 10 | 199.66 | Yes |
| Gh283      | 10 | 200.13 |     |
| COT119     | 10 | 200.44 |     |
| NAU5323    | 10 | 201.91 |     |
| CGR5349b   | 10 | 202.38 |     |
| Gh058      | 10 | 203.51 | Yes |
| HAU0218b   | 10 | 205.92 |     |
| CICR0943b  | 10 | 213.73 |     |
| CGR5040    | 10 | 214.56 | Yes |
| PGML01392  | 10 | 218.37 |     |
| PGML04583  | 10 | 218.86 |     |
| CICR0897   | 10 | 221.25 | Yes |
| CICR0943a  | 10 | 223.45 |     |
| HAU2824    | 10 | 224.41 | Yes |
| CICR0577   | 10 | 224.88 |     |
| SHIN-0613  | 10 | 224.88 |     |
| SWU0159    | 10 | 224.88 |     |
| HAU2147    | 10 | 225.34 |     |
| NAU2508    | 10 | 231.96 | Yes |
| DPL0617    | 11 | 0.00   | Yes |
| Gh433      | 11 | 3.17   | Yes |
| PGML04039a | 11 | 12.78  |     |
| HAU2974    | 11 | 21.99  | Yes |
| CICR0499   | 11 | 24.02  |     |
| NAU3074    | 11 | 32.85  | Yes |
| MUSS281    | 11 | 56.31  | Yes |
| CGR5113b   | 11 | 60.74  |     |
| DPL0715    | 11 | 60.74  |     |
| NAU2257    | 11 | 60.74  |     |
| HAU1134    | 11 | 60.93  | Yes |
| NAU5461b   | 11 | 66.18  |     |
| NAU5461a   | 11 | 69.59  | Yes |
| CICR0283   | 11 | 71.62  |     |
| NAU5192    | 11 | 71.99  |     |
| NAU3621    | 11 | 72.76  |     |
| HAU3031    | 11 | 73.94  |     |
| BNL3442    | 11 | 77.15  |     |
| CICR0044   | 11 | 79.60  |     |
| CGR5578    | 11 | 85.45  |     |
| CGR6697b   | 11 | 86.66  | Yes |
| HAU0848    | 11 | 90.27  | Yes |
| NAU3317    | 11 | 92.30  |     |
| STV069     | 11 | 95.95  |     |
| HAU1430    | 11 | 97.97  | Yes |
| DPL0472    | 11 | 99.57  |     |
| PGML00528  | 11 | 100.34 |     |
| DPL0900    | 11 | 101.51 |     |
| CGR6476    | 11 | 102.36 |     |
| NAU3409    | 11 | 103.87 | Yes |
| BNL1151    | 11 | 108.57 | Yes |
| NAU3265    | 11 | 109.95 |     |
| CGR5354    | 11 | 111.33 |     |
| PGML04105a | 11 | 112.51 |     |
| DPL0698    | 11 | 113.08 |     |
| TMB2281    | 11 | 113.65 |     |

|            |    |        |     |
|------------|----|--------|-----|
| BNL3431    | 11 | 113.92 |     |
| TMB0043    | 11 | 115.86 |     |
| PGML04308  | 11 | 117.24 |     |
| CICR0602   | 11 | 117.62 |     |
| CICR0361   | 11 | 119.42 |     |
| TMB2803    | 11 | 122.35 |     |
| BNL1404    | 11 | 122.54 |     |
| TMB1915    | 11 | 122.54 |     |
| HAU2478    | 11 | 122.92 |     |
| JESPR135   | 11 | 123.17 |     |
| BNL3411    | 11 | 123.78 |     |
| Gh074b     | 11 | 124.65 | Yes |
| NAU3234    | 11 | 126.68 | Yes |
| MUSS244    | 11 | 130.84 | Yes |
| CER0035    | 11 | 131.82 |     |
| SHIN-0224  | 11 | 132.59 |     |
| CICR0359   | 11 | 133.56 |     |
| CICR0951   | 11 | 133.94 |     |
| CICR0286   | 11 | 134.32 |     |
| CICR0246   | 11 | 134.70 |     |
| NAU2651    | 11 | 135.27 | Yes |
| CICR0433   | 11 | 136.65 |     |
| DPL0789    | 11 | 138.67 |     |
| PGML04039b | 11 | 141.37 |     |
| DPL0528    | 11 | 146.91 | Yes |
| SHIN-0610  | 11 | 147.88 |     |
| HAU2837    | 11 | 150.34 |     |
| NAU3478    | 11 | 153.28 | Yes |
| PGML03001  | 11 | 154.05 |     |
| DPL0065    | 11 | 157.71 |     |
| CGR6862    | 11 | 162.15 |     |
| DPL0851    | 11 | 163.33 |     |
| HAU2836b   | 11 | 164.92 |     |
| BNL0625    | 11 | 166.09 | Yes |
| TMB2453    | 11 | 166.86 |     |
| C2-0078    | 11 | 167.24 |     |
| DC40196    | 11 | 167.62 |     |
| DPL0253    | 11 | 168.59 |     |
| SHIN-0601  | 11 | 169.68 |     |
| DPL0505    | 11 | 170.53 |     |
| COT091     | 11 | 173.23 |     |
| TMB0064    | 11 | 175.23 | Yes |
| PGML03769  | 11 | 181.27 |     |
| HAU0639    | 11 | 186.52 |     |
| CGR5835    | 11 | 187.30 |     |
| HAU0205    | 11 | 187.48 | Yes |
| CGR6385    | 11 | 187.48 |     |
| TMB0426    | 11 | 188.10 |     |
| DPL0103    | 11 | 193.59 | Yes |
| HAU0217    | 11 | 198.77 |     |
| DPL0021    | 11 | 199.80 |     |
| SWU0470    | 11 | 203.61 |     |
| NAU3227    | 11 | 207.68 | Yes |
| CGR5112    | 11 | 208.25 |     |
| BNL1408    | 11 | 208.44 |     |
| MUCS507    | 11 | 210.25 |     |
| MUSB0827   | 11 | 211.02 |     |
| DPL0338    | 11 | 211.20 |     |
| CICR0280   | 11 | 213.01 |     |
| NAU0891    | 11 | 216.13 |     |
| NAU3703    | 11 | 216.74 |     |

|            |    |        |     |
|------------|----|--------|-----|
| DPL0325    | 11 | 217.12 | Yes |
| HAU0512    | 11 | 217.12 |     |
| DPL0571    | 11 | 223.32 |     |
| JESPR296   | 11 | 231.97 | Yes |
| CGR6270    | 11 | 236.59 |     |
| NAU4086    | 11 | 237.97 | Yes |
| NAU4962    | 11 | 238.74 |     |
| DPL0270    | 11 | 239.12 |     |
| HAU3288    | 11 | 248.24 |     |
| DPL0209    | 11 | 252.99 | Yes |
| CM140      | 11 | 258.82 |     |
| MUCS379    | 11 | 259.99 | Yes |
| CER0153b   | 11 | 261.58 |     |
| CGR5428    | 11 | 262.96 |     |
| C2-0120    | 11 | 264.99 |     |
| MUCS609    | 11 | 266.37 | Yes |
| HAU1283b   | 11 | 275.58 | Yes |
| HAU1809b   | 11 | 275.77 |     |
| CER0098    | 11 | 275.96 |     |
| CM050      | 12 | 0.00   |     |
| TMB0799    | 12 | 12.62  | Yes |
| NAU5252    | 12 | 13.95  |     |
| NAU3561    | 12 | 15.03  |     |
| C2-0111    | 12 | 15.64  |     |
| NAU3862    | 12 | 16.72  | Yes |
| HAU3127    | 12 | 20.20  |     |
| DC40186    | 12 | 23.28  |     |
| HAU2934    | 12 | 23.58  |     |
| NAU4926    | 12 | 24.34  |     |
| CGR5111    | 12 | 25.93  |     |
| CGR5658    | 12 | 26.85  |     |
| CICR0393   | 12 | 27.46  |     |
| DPL0248    | 12 | 28.38  | Yes |
| BNL3599a   | 12 | 31.45  | Yes |
| CGR6698a   | 12 | 31.45  |     |
| DPL0036a   | 12 | 31.75  |     |
| DC20022    | 12 | 32.87  |     |
| PGML00640  | 12 | 35.98  |     |
| PGML04005  | 12 | 42.81  |     |
| CGR6826    | 12 | 44.77  |     |
| NAU0884    | 12 | 44.82  | Yes |
| DPL0575    | 12 | 45.22  |     |
| HAU3323    | 12 | 46.98  |     |
| PGML01594b | 12 | 49.81  |     |
| MUCS363    | 12 | 51.10  |     |
| CGR6844    | 12 | 52.52  |     |
| PGML02980  | 12 | 53.77  |     |
| DPL0796a   | 12 | 54.22  |     |
| HAU1313    | 12 | 54.52  |     |
| CGR6764    | 12 | 54.82  |     |
| DPL0866a   | 12 | 56.58  |     |
| PMGL00420  | 12 | 59.66  |     |
| HAU2881    | 12 | 63.56  | Yes |
| CICR0413   | 12 | 65.33  |     |
| CGR5517    | 12 | 67.63  |     |
| CGR6056    | 12 | 67.78  |     |
| CGR6825    | 12 | 67.78  |     |
| NAU2176    | 12 | 68.38  | Yes |
| CICR0469   | 12 | 68.53  |     |
| HAU1434b   | 12 | 69.58  |     |
| NAU5164b   | 12 | 69.91  |     |

|            |    |        |     |
|------------|----|--------|-----|
| HAU1666    | 12 | 70.11  |     |
| COT135     | 12 | 70.51  |     |
| NAU5139    | 12 | 72.93  | Yes |
| CGR6742a   | 12 | 74.34  |     |
| CICR0324   | 12 | 75.44  |     |
| Gh243b     | 12 | 78.01  |     |
| TMB0263    | 12 | 79.95  |     |
| BNL1673    | 12 | 80.71  |     |
| DPL0303    | 12 | 80.71  |     |
| DPL0379    | 12 | 81.72  |     |
| DPL0380a   | 12 | 82.88  |     |
| CICR0199   | 12 | 83.70  |     |
| HAU1361    | 12 | 84.57  | Yes |
| NAU0943    | 12 | 85.02  |     |
| HAU1874    | 12 | 85.62  |     |
| CGR5158    | 12 | 86.07  |     |
| DPL0491    | 12 | 93.32  |     |
| HAU0734    | 12 | 101.52 | Yes |
| DPL0400    | 12 | 105.65 |     |
| HAU0107    | 12 | 107.77 |     |
| Gh188      | 12 | 108.37 |     |
| NAU4889    | 12 | 110.86 | Yes |
| NAU3713    | 12 | 111.47 |     |
| PGML01637  | 12 | 113.41 |     |
| CGR5151    | 12 | 114.66 |     |
| HAU1454    | 12 | 114.96 | Yes |
| NAU2672    | 12 | 118.24 |     |
| HAU0989    | 12 | 119.69 | Yes |
| CGR5102    | 12 | 123.55 |     |
| CICR0389   | 12 | 123.85 |     |
| HAU1321    | 12 | 124.30 |     |
| HAU0295    | 12 | 125.39 |     |
| NAU1301    | 12 | 126.54 |     |
| DPL0917a   | 12 | 128.23 | Yes |
| BNL4059    | 12 | 130.17 |     |
| DPL0443    | 12 | 130.94 |     |
| NAU3778    | 12 | 132.91 |     |
| DC40230    | 12 | 133.46 |     |
| DPL0343    | 12 | 137.96 | Yes |
| HAU0371    | 13 | 0.00   | Yes |
| CGR6812    | 13 | 1.77   |     |
| NAU0803    | 13 | 2.00   | Yes |
| HAU1577    | 13 | 2.49   |     |
| HAU0250    | 13 | 8.31   |     |
| BNL1707    | 13 | 8.68   | Yes |
| CIR054     | 13 | 13.94  | Yes |
| PGML02505a | 13 | 19.76  |     |
| PGML03773  | 13 | 27.46  | Yes |
| NAU2730    | 13 | 32.18  | Yes |
| DPL0639    | 13 | 34.10  |     |
| CICR0628b  | 13 | 36.45  |     |
| NAU3948    | 13 | 40.66  | Yes |
| BNL1495    | 13 | 41.07  |     |
| NAU5279    | 13 | 44.19  |     |
| BNL2652a   | 13 | 45.13  | Yes |
| DPL0754    | 13 | 45.35  |     |
| CICR0382   | 13 | 47.28  |     |
| BNL2449    | 13 | 48.39  |     |
| CGR5786b   | 13 | 49.12  |     |
| DPL0274    | 13 | 49.71  |     |
| Gh092a     | 13 | 52.01  | Yes |



|            |    |        |     |
|------------|----|--------|-----|
| Gh092b     | 13 | 53.52  |     |
| Gh678      | 13 | 58.51  | Yes |
| BNL1438    | 13 | 62.47  |     |
| PGML03194b | 13 | 65.71  |     |
| DC40441    | 13 | 68.76  |     |
| CGR5925b   | 13 | 69.60  |     |
| PGML03887b | 13 | 70.57  |     |
| CM063a     | 13 | 71.49  |     |
| TMB0403    | 13 | 71.49  |     |
| DPL0460b   | 13 | 71.89  |     |
| NAU3989    | 13 | 73.36  | Yes |
| HAU1091    | 13 | 73.36  |     |
| DC20120    | 13 | 74.09  |     |
| MUSB0421   | 13 | 76.65  |     |
| PGML04464  | 13 | 79.00  |     |
| NAU1201    | 13 | 82.25  | Yes |
| MGHES38b   | 13 | 83.26  |     |
| HAU2456    | 13 | 84.69  |     |
| HAU1513b   | 13 | 86.20  |     |
| DPL0635    | 13 | 86.38  |     |
| CGR6231b   | 13 | 90.10  |     |
| Gh215      | 13 | 103.25 | Yes |
| PGML02035  | 13 | 115.68 | Yes |
| HAU1908    | 13 | 131.76 |     |
| NAU3398    | 13 | 137.04 | Yes |
| NAU3522    | 13 | 151.30 | Yes |
| PGML00806  | 13 | 158.73 |     |
| CGR5242    | 13 | 164.25 | Yes |
| CER0005    | 13 | 165.56 |     |
| CGR5827    | 13 | 165.56 |     |
| DPL0083    | 13 | 165.56 |     |
| Gh034      | 13 | 165.56 |     |
| Gh592      | 13 | 165.92 |     |
| PGML01230  | 13 | 166.65 |     |
| HAU2089    | 13 | 170.86 |     |
| PGML04131a | 13 | 179.61 | Yes |
| NAU3468    | 13 | 184.33 | Yes |
| CICR0182   | 13 | 185.06 |     |
| SHIN-0412  | 13 | 185.24 |     |
| CGR5021b   | 13 | 185.60 |     |
| MUCS145    | 13 | 186.52 | Yes |
| HAU1195    | 13 | 187.64 |     |
| HAU1997    | 13 | 188.00 |     |
| CGR5331    | 13 | 188.74 |     |
| CICR0273   | 13 | 188.74 |     |
| SHIN-1462  | 13 | 188.74 |     |
| NAU2300    | 13 | 189.10 |     |
| CGR5554    | 13 | 192.88 | Yes |
| SHIN-1512  | 13 | 206.74 |     |
| CICR0675   | 13 | 211.73 |     |
| CGR5005    | 13 | 211.91 |     |
| HAU2836a   | 13 | 212.46 | Yes |
| CGR5544    | 14 | 0.00   | Yes |
| CGR5668    | 14 | 8.43   | Yes |
| PGML03546  | 14 | 14.15  |     |
| DPL0919    | 14 | 14.54  |     |
| HAU3071    | 14 | 17.07  |     |
| NAU3733    | 14 | 18.27  |     |
| NAU3585    | 14 | 18.46  | Yes |
| PGML02861b | 14 | 18.46  |     |
| HAU0517    | 14 | 20.31  |     |

|            |    |        |     |
|------------|----|--------|-----|
| NAU5047    | 14 | 22.15  |     |
| HAU3236    | 14 | 22.35  |     |
| NAU5467    | 14 | 22.54  |     |
| HAU1485    | 14 | 23.53  | Yes |
| NAU5490    | 14 | 24.95  |     |
| PGML01915  | 14 | 31.95  |     |
| NAU3648    | 14 | 40.73  | Yes |
| PGML03485  | 14 | 43.27  |     |
| CGR5876b   | 14 | 44.47  |     |
| NAU5421    | 14 | 46.54  | Yes |
| CICR0140   | 14 | 47.13  |     |
| PGML03232  | 14 | 48.54  |     |
| HAU1980a   | 14 | 50.61  | Yes |
| PGML02878  | 14 | 50.61  |     |
| NAU3485    | 14 | 50.61  |     |
| NAU4024    | 14 | 52.24  |     |
| CGR5448    | 14 | 55.01  |     |
| CICR0842   | 14 | 58.16  |     |
| HAU1049    | 14 | 60.10  |     |
| PGML02670  | 14 | 60.49  |     |
| NAU5250    | 14 | 61.28  |     |
| TMB1348    | 14 | 62.37  |     |
| CGR6683    | 14 | 63.48  |     |
| CGR6707    | 14 | 68.60  | Yes |
| NAU3499    | 14 | 77.67  |     |
| C2-0079    | 14 | 81.62  |     |
| BNL1059    | 14 | 83.01  | Yes |
| CGR6550    | 14 | 86.36  |     |
| PGML02953b | 14 | 89.61  |     |
| CICR0377   | 14 | 94.42  | Yes |
| CICR0213   | 14 | 96.94  |     |
| CICR0135   | 14 | 99.47  |     |
| CGR6729b   | 14 | 101.32 |     |
| NAU2154    | 14 | 101.32 |     |
| NAU4025    | 14 | 101.32 |     |
| DPL0235    | 14 | 101.71 |     |
| CGR6716b   | 14 | 102.09 |     |
| CICR0592   | 14 | 102.09 |     |
| NAU2155    | 14 | 102.09 |     |
| NAU3312    | 14 | 102.09 |     |
| NAU3816b   | 14 | 102.09 |     |
| SHIN-1481b | 14 | 102.29 |     |
| Gh462      | 14 | 102.48 |     |
| BNL3145    | 14 | 104.33 | Yes |
| CGR5818    | 14 | 106.41 |     |
| PGML03980  | 14 | 106.79 |     |
| CGR6383    | 14 | 113.15 | Yes |
| NAU4929    | 14 | 126.96 | Yes |
| Gh051      | 14 | 131.79 |     |
| BNL2882    | 14 | 132.38 |     |
| CGR5581    | 14 | 132.97 |     |
| TMB0803    | 14 | 133.36 |     |
| CGR5030    | 14 | 133.94 |     |
| NAU2987    | 14 | 135.57 | Yes |
| HAU1888    | 14 | 135.76 |     |
| PGML04271b | 14 | 136.15 |     |
| CGR6948    | 14 | 138.24 |     |
| PGML04653  | 14 | 139.87 |     |
| DPL0638    | 14 | 140.46 |     |
| PGML03030  | 14 | 141.45 |     |
| HAU0438    | 14 | 143.08 | Yes |

|            |    |        |     |
|------------|----|--------|-----|
| PGML01010  | 14 | 146.50 |     |
| PGML01521  | 14 | 148.19 | Yes |
| BNL3034    | 14 | 150.04 |     |
| MGHES73    | 14 | 150.43 |     |
| NAU2336    | 14 | 150.43 |     |
| NAU3913    | 14 | 150.43 |     |
| HAU1741    | 14 | 150.62 |     |
| NAU3242    | 14 | 155.17 |     |
| PGML02865  | 14 | 160.56 |     |
| PGML03864  | 14 | 161.76 |     |
| DPL0354    | 14 | 164.76 |     |
| DPL0390    | 14 | 168.83 |     |
| NAU3225    | 14 | 171.34 | Yes |
| PGML02080  | 14 | 172.13 |     |
| CGR5258    | 14 | 172.52 |     |
| PGML00357  | 14 | 174.81 |     |
| SHIN-0659b | 14 | 178.14 |     |
| PGML01568  | 14 | 179.93 |     |
| NAU3214    | 14 | 181.56 | Yes |
| NAU5465    | 14 | 184.56 |     |
| HAU1720    | 14 | 189.65 |     |
| CICR0052   | 14 | 190.85 |     |
| HAU1123    | 14 | 190.85 |     |
| NAU3820    | 14 | 191.24 | Yes |
| DPL0502a   | 14 | 194.00 | Yes |
| CER0138    | 14 | 195.42 |     |
| CER0101    | 14 | 199.96 |     |
| HAU0883a   | 14 | 202.97 | Yes |
| DC40046    | 14 | 205.50 |     |
| DPL0473    | 14 | 206.50 | Yes |
| HAU1219a   | 14 | 206.88 |     |
| BNL3932    | 14 | 206.88 |     |
| DPL0521    | 14 | 207.27 |     |
| HAU1219b   | 14 | 215.94 | Yes |
| NAU4073    | 15 | 0.00   | Yes |
| NAU3102    | 15 | 4.06   |     |
| CICR0815   | 15 | 16.32  | Yes |
| HAU1045    | 15 | 19.51  | Yes |
| NAU3347    | 15 | 24.51  | Yes |
| HAU1058a   | 15 | 26.90  | Yes |
| CGR5106a   | 15 | 27.06  |     |
| CGR6129    | 15 | 33.97  |     |
| PGML00834  | 15 | 39.76  |     |
| NAU3177    | 15 | 43.61  | Yes |
| CGR5834    | 15 | 43.91  |     |
| HAU0489    | 15 | 44.22  |     |
| HAU3050a   | 15 | 47.35  |     |
| PGML03798  | 15 | 51.56  |     |
| DC40217    | 15 | 52.69  |     |
| HAU1001    | 15 | 53.64  |     |
| SWU1087    | 15 | 54.27  |     |
| HAU1354    | 15 | 54.58  |     |
| NAU3714    | 15 | 55.21  | Yes |
| NAU3057    | 15 | 58.40  |     |
| PGML00799  | 15 | 59.03  |     |
| PGML02554  | 15 | 60.42  |     |
| TMB0119b   | 15 | 61.46  |     |
| TMB1224b   | 15 | 61.46  |     |
| BNL0786    | 15 | 62.25  | Yes |
| HAU0670    | 15 | 66.78  | Yes |
| DPL0023a   | 15 | 68.98  |     |

|            |    |        |     |
|------------|----|--------|-----|
| HAU1427    | 15 | 70.28  |     |
| PGML03654  | 15 | 70.28  |     |
| NAU3744a   | 15 | 70.44  |     |
| HAU0309    | 15 | 71.06  |     |
| DPL0326    | 15 | 72.19  |     |
| DPL0109b   | 15 | 72.82  |     |
| CICR0455   | 15 | 73.45  |     |
| CGR5236    | 15 | 74.92  |     |
| HAU0271    | 15 | 76.22  |     |
| Gh649a     | 15 | 77.34  | Yes |
| DPL0425    | 15 | 80.96  |     |
| DPL0428    | 15 | 84.16  |     |
| NAU2985    | 15 | 88.22  | Yes |
| MUSS422    | 15 | 97.84  |     |
| TMB0375    | 15 | 101.01 |     |
| CGR6726    | 15 | 101.18 |     |
| HAU3351    | 15 | 101.55 |     |
| MUSB0440   | 15 | 102.28 |     |
| PGML04991a | 15 | 102.43 |     |
| BNL4082    | 15 | 103.08 | Yes |
| DPL0509b   | 15 | 103.24 |     |
| MUSB1130   | 15 | 107.96 |     |
| DPL0264    | 15 | 111.57 |     |
| PGML02703  | 15 | 111.57 |     |
| DC30026    | 15 | 112.04 | Yes |
| PGML04427  | 15 | 112.35 |     |
| TMB0585    | 15 | 112.98 |     |
| PGML04032  | 15 | 116.40 |     |
| MUSB1081   | 15 | 120.04 | Yes |
| NAU3486    | 15 | 123.88 | Yes |
| DPL0300    | 15 | 130.78 |     |
| DPL0187    | 15 | 136.86 |     |
| DC40014    | 15 | 140.07 |     |
| JESPR180   | 15 | 140.23 |     |
| JESPR205   | 15 | 140.23 |     |
| JESPR298   | 15 | 140.23 |     |
| DPL0509a   | 15 | 140.39 |     |
| CICR0665   | 15 | 140.54 |     |
| CICR0805   | 15 | 140.54 |     |
| NAU5230    | 15 | 140.69 |     |
| BNL1666    | 15 | 140.85 |     |
| NAU3680    | 15 | 140.85 |     |
| NAU0861    | 15 | 142.15 |     |
| PGML02493  | 15 | 142.77 |     |
| DPL0437    | 15 | 142.93 |     |
| NAU3690    | 15 | 143.08 | Yes |
| PGML01203  | 15 | 143.08 |     |
| PGML02985  | 15 | 143.08 |     |
| C2-0022C   | 15 | 143.55 |     |
| TMB0201    | 15 | 145.02 |     |
| NAU3736    | 15 | 145.49 |     |
| TMB1660    | 15 | 145.64 |     |
| TMB1152a   | 15 | 145.80 |     |
| COT059     | 15 | 148.19 |     |
| TMB1664    | 15 | 151.49 |     |
| PGML02824b | 15 | 154.45 |     |
| CGR5056a   | 15 | 160.73 | Yes |
| CGR6803b   | 15 | 162.43 |     |
| HAU2129    | 15 | 163.06 |     |
| CER0013    | 15 | 165.84 |     |
| CGR5326a   | 15 | 165.99 |     |

|            |    |        |     |
|------------|----|--------|-----|
| CGR5663    | 15 | 167.12 |     |
| DPL0346a   | 15 | 170.58 |     |
| DPL0402    | 15 | 173.82 |     |
| JESPR152   | 15 | 174.48 | Yes |
| MUSS085    | 15 | 177.43 | Yes |
| HAU3132    | 15 | 179.08 |     |
| SWU0280b   | 15 | 179.87 |     |
| MUCS141    | 15 | 182.27 |     |
| MUCS422    | 15 | 183.40 |     |
| MUCS410    | 15 | 184.36 |     |
| HAU0059    | 15 | 184.83 | Yes |
| HAU0077    | 15 | 185.46 |     |
| NAU5138    | 15 | 187.60 |     |
| DPL0302    | 15 | 188.87 |     |
| MUSS563    | 15 | 195.09 | Yes |
| NAU3496    | 16 | 0.00   | Yes |
| NAU3459    | 16 | 7.10   | Yes |
| PGML04451  | 16 | 8.81   |     |
| CGR5679    | 16 | 10.52  |     |
| CIR175     | 16 | 11.15  | Yes |
| DPL0364a   | 16 | 12.27  |     |
| CER0112    | 16 | 14.31  |     |
| CGR5149    | 16 | 16.79  | Yes |
| CGR5396    | 16 | 19.04  |     |
| DPL0829    | 16 | 22.22  |     |
| NAU2239    | 16 | 27.21  |     |
| PGML02837  | 16 | 28.80  |     |
| HAU0120    | 16 | 29.18  | Yes |
| SHIN-1405b | 16 | 29.95  |     |
| DPL0501    | 16 | 30.53  |     |
| CICR0442   | 16 | 31.50  |     |
| HAU0732    | 16 | 32.89  |     |
| CGR5001b   | 16 | 34.44  |     |
| SHIN-0376b | 16 | 36.31  |     |
| PGML02869  | 16 | 38.79  |     |
| PGML04674  | 16 | 44.95  |     |
| NAU5120a   | 16 | 52.72  | Yes |
| CGR5621    | 16 | 58.09  |     |
| CGR6894a   | 16 | 59.27  |     |
| COT048a    | 16 | 59.74  |     |
| NAU4956    | 16 | 61.45  |     |
| PGML01349  | 16 | 62.23  |     |
| HAU1836    | 16 | 63.61  |     |
| Gh056      | 16 | 64.59  |     |
| BNL2634    | 16 | 65.97  | Yes |
| CICR0587   | 16 | 66.35  |     |
| PGML02608  | 16 | 66.54  |     |
| HAU1201    | 16 | 67.51  |     |
| HAU2555    | 16 | 68.09  |     |
| PGML04077  | 16 | 69.06  |     |
| DC40065    | 16 | 69.64  |     |
| DPL0511    | 16 | 70.82  |     |
| C2-0011B   | 16 | 71.79  |     |
| PGML03471  | 16 | 73.60  |     |
| NAU2749    | 16 | 77.27  |     |
| NAU5408    | 16 | 79.08  | Yes |
| NAU3594    | 16 | 79.85  |     |
| PGML02570  | 16 | 81.03  |     |
| BNL3008    | 16 | 81.41  |     |
| JESPR102   | 16 | 81.60  |     |
| NAU6259    | 16 | 82.99  |     |

|            |    |        |     |
|------------|----|--------|-----|
| DPL0432    | 16 | 85.94  |     |
| CICR0084   | 16 | 88.82  |     |
| COT096b    | 16 | 90.29  |     |
| NAU2186    | 16 | 90.29  |     |
| CIR100     | 16 | 90.67  |     |
| CGR6280    | 16 | 92.06  |     |
| PGML01011  | 16 | 93.87  |     |
| PGML02429  | 16 | 95.68  |     |
| BNL2986    | 16 | 95.91  | Yes |
| STV023     | 16 | 98.11  |     |
| PGML02824a | 16 | 102.48 |     |
| DPL0167    | 16 | 111.73 | Yes |
| PGML00586  | 16 | 124.36 |     |
| DPL0342    | 16 | 127.78 | Yes |
| CGR6686    | 16 | 127.97 |     |
| TMB0837    | 16 | 129.04 |     |
| NAU2995    | 16 | 130.13 | Yes |
| PGML01330  | 16 | 135.13 |     |
| DPL0294    | 16 | 140.17 |     |
| CGR5139    | 16 | 141.14 |     |
| NAU6664    | 16 | 143.17 |     |
| NAU6375    | 16 | 143.94 |     |
| DPL0048    | 16 | 145.75 | Yes |
| Gh002      | 16 | 148.00 |     |
| TMB0180    | 16 | 148.00 |     |
| DPL0897    | 16 | 148.98 |     |
| PGML03165b | 16 | 150.36 |     |
| JESPR297   | 16 | 151.75 | Yes |
| PGML01309  | 16 | 151.75 |     |
| PGML00820  | 16 | 151.98 |     |
| DPL0920a   | 16 | 152.91 |     |
| NAU0797    | 16 | 153.09 |     |
| CGR5018    | 16 | 154.07 |     |
| BNL1604    | 16 | 158.26 |     |
| CGR5880    | 16 | 158.26 |     |
| HAU1399    | 16 | 165.37 | Yes |
| HAU1559    | 16 | 171.52 |     |
| CICR0774   | 16 | 172.70 |     |
| NAU2680    | 16 | 172.70 |     |
| NAU2733    | 16 | 172.89 | Yes |
| NAU2734    | 16 | 173.08 |     |
| CICR0452   | 16 | 174.05 |     |
| NAU2556    | 16 | 175.65 |     |
| BNL3065    | 16 | 176.71 | Yes |
| DPL0283    | 16 | 182.47 | Yes |
| CGR6680    | 16 | 188.28 |     |
| PGML00300  | 16 | 189.28 |     |
| NAU3906    | 16 | 189.66 |     |
| HAU2060    | 16 | 190.04 |     |
| CICR0027   | 16 | 191.43 | Yes |
| NAU5325    | 16 | 192.00 |     |
| NAU3678    | 16 | 192.38 |     |
| DPL0492a   | 16 | 192.76 |     |
| DPL0492c   | 16 | 197.75 |     |
| DPL0603    | 16 | 210.52 | Yes |
| CICR0447   | 17 | 0.00   | Yes |
| NAU2898    | 17 | 2.04   | Yes |
| MGHES17    | 17 | 2.04   |     |
| CGR6905    | 17 | 2.68   |     |
| PGML03126  | 17 | 4.45   |     |
| HAU0800a   | 17 | 5.31   | Yes |

|            |    |        |     |
|------------|----|--------|-----|
| DC40292    | 17 | 12.81  |     |
| PGML02308  | 17 | 13.27  |     |
| CGR6834    | 17 | 13.91  |     |
| DPL0017    | 17 | 14.12  |     |
| TMB1268    | 17 | 14.79  | Yes |
| DPL0245b   | 17 | 17.76  |     |
| CICR0004   | 17 | 21.56  |     |
| HAU2014    | 17 | 23.34  | Yes |
| HAU3318    | 17 | 23.76  |     |
| NAU3349    | 17 | 27.84  |     |
| DPL0281    | 17 | 32.48  | Yes |
| PGML02856  | 17 | 37.13  |     |
| JESPR101b  | 17 | 38.43  |     |
| PGML04991b | 17 | 39.29  |     |
| PGML04550  | 17 | 40.15  |     |
| BNL3955    | 17 | 40.90  |     |
| HAU1024    | 17 | 41.65  |     |
| HAU1513c   | 17 | 42.51  |     |
| DPL0200    | 17 | 45.01  |     |
| NAU2909    | 17 | 47.26  | Yes |
| CGR6695    | 17 | 49.52  |     |
| PGML01532  | 17 | 51.77  |     |
| PGML01494  | 17 | 52.19  |     |
| COT064     | 17 | 52.83  |     |
| NAU2325    | 17 | 56.36  | Yes |
| NAU6634    | 17 | 67.53  |     |
| NAU3309    | 17 | 82.35  | Yes |
| NAU6542    | 17 | 90.26  |     |
| HAU0764    | 17 | 93.28  | Yes |
| CICR0331   | 17 | 94.13  |     |
| JESPR195   | 17 | 94.88  |     |
| DPL0279    | 17 | 97.01  |     |
| PGML04756  | 17 | 106.45 | Yes |
| NAU4052    | 17 | 114.34 |     |
| DPL0529    | 17 | 114.55 |     |
| PGML04142  | 17 | 114.55 |     |
| HAU0863    | 17 | 115.63 |     |
| NAU2150    | 17 | 117.64 |     |
| CGR6185    | 17 | 119.41 |     |
| NAU3800    | 17 | 119.83 |     |
| HAU0630    | 17 | 120.04 | Yes |
| HAU0195a   | 17 | 122.79 | Yes |
| HAU2786    | 17 | 127.44 |     |
| HAU1413    | 17 | 128.08 | Yes |
| NAU3995    | 17 | 128.08 |     |
| NAU1167    | 17 | 129.39 |     |
| NAU3839    | 17 | 131.40 |     |
| NAU2742    | 17 | 132.94 |     |
| PGML00950a | 17 | 134.71 |     |
| NAU3016b   | 17 | 136.96 |     |
| TMB0874    | 17 | 138.89 | Yes |
| BNL2496    | 17 | 139.83 |     |
| SHIN-1343  | 17 | 140.69 |     |
| CGR6830    | 17 | 141.11 |     |
| CGR5300    | 17 | 142.19 |     |
| NAU3797    | 17 | 143.73 |     |
| NAU2691    | 17 | 143.94 | Yes |
| PGML00880  | 17 | 145.04 |     |
| NAU6173    | 18 | 0.00   |     |
| NAU3685    | 18 | 5.04   | Yes |
| PGML02505b | 18 | 9.99   |     |

|            |    |        |     |
|------------|----|--------|-----|
| HAU0595    | 18 | 10.85  | Yes |
| BNL2544    | 18 | 11.37  |     |
| DPL0286    | 18 | 11.70  |     |
| CER0122    | 18 | 11.70  |     |
| HAU1880    | 18 | 12.22  |     |
| NAU3203    | 18 | 13.83  | Yes |
| PGML02477  | 18 | 18.12  |     |
| Gh092c     | 18 | 28.97  | Yes |
| NAU4103    | 18 | 38.67  | Yes |
| CGR6787    | 18 | 42.63  |     |
| DPL0421    | 18 | 44.24  |     |
| BNL2652b   | 18 | 44.93  |     |
| DPL0033    | 18 | 45.79  |     |
| CGR5786a   | 18 | 46.30  | Yes |
| PGML01649  | 18 | 47.50  |     |
| SHIN-1530  | 18 | 47.70  |     |
| DC20021    | 18 | 47.70  |     |
| CM063b     | 18 | 47.70  |     |
| DPL0460a   | 18 | 48.04  |     |
| PGML03887a | 18 | 50.04  |     |
| BNL1079    | 18 | 51.10  | Yes |
| BNL1721    | 18 | 51.79  |     |
| NAU3816a   | 18 | 52.13  |     |
| CGR5856    | 18 | 53.74  |     |
| HAU3061    | 18 | 55.94  |     |
| PGML00374  | 18 | 66.07  | Yes |
| NAU1141    | 18 | 77.58  | Yes |
| PGML02492  | 18 | 89.51  |     |
| PGML04767  | 18 | 95.53  |     |
| NAU3211    | 18 | 95.87  | Yes |
| CGR6231a   | 18 | 96.04  |     |
| JESPR153   | 18 | 96.04  |     |
| BNL3479    | 18 | 96.56  |     |
| DC40426    | 18 | 97.25  |     |
| COT114     | 18 | 98.48  |     |
| PMGL00427  | 18 | 100.09 |     |
| DPL0161    | 18 | 103.58 |     |
| DPL0660    | 18 | 105.99 |     |
| DPL0420    | 18 | 107.04 |     |
| CGR6522a   | 18 | 107.21 |     |
| NAU2443    | 18 | 107.90 |     |
| SHIN-1346  | 18 | 108.58 |     |
| TMB1767    | 18 | 113.02 |     |
| SHIN-1451  | 18 | 117.46 | Yes |
| DPL0339    | 18 | 118.52 |     |
| DC40005    | 18 | 120.52 |     |
| CER0145    | 18 | 121.03 |     |
| HAU1036    | 18 | 121.54 |     |
| JESPR056c  | 18 | 122.96 |     |
| Gh055      | 18 | 123.13 |     |
| NAU3017    | 18 | 123.64 | Yes |
| NAU3589    | 18 | 125.45 |     |
| HAU1381    | 18 | 126.50 |     |
| SHIN-1403  | 18 | 126.50 |     |
| PGML04131b | 18 | 127.73 |     |
| CGR5021a   | 18 | 129.73 |     |
| NAU5074    | 18 | 130.96 | Yes |
| SWU0126    | 18 | 132.19 |     |
| HAU1212    | 18 | 132.36 |     |
| HAU1989    | 18 | 132.36 |     |
| C2-0104    | 18 | 132.53 |     |



|            |    |        |     |
|------------|----|--------|-----|
| HAU3406    | 18 | 134.54 |     |
| DPL0795    | 18 | 137.38 | Yes |
| DPL0348    | 18 | 138.80 | Yes |
| PGML04888  | 18 | 138.96 |     |
| DPL0375    | 18 | 141.37 |     |
| NAU3161    | 18 | 143.37 |     |
| HAU1167    | 18 | 143.54 |     |
| NAU3080    | 18 | 144.05 |     |
| NAU2488    | 18 | 144.22 |     |
| HAU0899    | 18 | 144.56 |     |
| CGR6750    | 18 | 144.73 |     |
| HAU0209    | 18 | 145.24 |     |
| CICR0223   | 18 | 146.29 |     |
| HAU2550    | 18 | 148.90 |     |
| NAU4860    | 18 | 152.52 | Yes |
| NAU3843    | 18 | 156.62 |     |
| PGML01307  | 18 | 161.83 |     |
| NAU3991    | 18 | 164.45 |     |
| HAU1922    | 18 | 166.64 |     |
| NAU3447    | 18 | 166.82 |     |
| HAU1782b   | 18 | 167.68 |     |
| PGML03537  | 18 | 168.55 |     |
| NAU3827    | 18 | 168.72 | Yes |
| DPL0910    | 18 | 169.23 |     |
| CICR0227   | 18 | 170.59 |     |
| NAU2863    | 18 | 175.10 | Yes |
| PGML02956  | 18 | 186.95 | Yes |
| CICR0851   | 19 | 0.00   | Yes |
| HAU0112    | 19 | 4.14   |     |
| CICR0547   | 19 | 7.36   |     |
| PGML02014  | 19 | 11.50  |     |
| Gh182      | 19 | 13.57  | Yes |
| NAU3631    | 19 | 14.32  |     |
| DPL0247b   | 19 | 14.32  |     |
| NAU3609    | 19 | 14.32  |     |
| HAU0139    | 19 | 14.32  |     |
| HAU3114    | 19 | 16.12  |     |
| NAU3405    | 19 | 17.39  | Yes |
| PGML01008  | 19 | 19.74  |     |
| CGR6151    | 19 | 21.78  |     |
| DPL0140    | 19 | 25.66  |     |
| CGR6708b   | 19 | 26.66  |     |
| BNL3452    | 19 | 27.41  | Yes |
| PGML04350b | 19 | 29.77  |     |
| NAU2894    | 19 | 33.60  |     |
| HAU3069    | 19 | 39.04  |     |
| SHIN-1398  | 19 | 39.79  |     |
| NAU4884    | 19 | 41.59  | Yes |
| CGR5799    | 19 | 44.52  |     |
| CGR5803    | 19 | 45.01  |     |
| DPL0076    | 19 | 45.51  |     |
| DPL0870    | 19 | 45.75  |     |
| CGR5814    | 19 | 45.75  |     |
| NAU3372    | 19 | 48.39  | Yes |
| TMB1599    | 19 | 50.42  |     |
| NAU3343    | 19 | 54.93  |     |
| COT037     | 19 | 60.61  | Yes |
| CIR212     | 19 | 63.64  |     |
| HAU0216    | 19 | 66.28  |     |
| Gh071      | 19 | 67.28  |     |
| CGR5845    | 19 | 68.55  |     |

|           |    |        |     |
|-----------|----|--------|-----|
| DPL0556   | 19 | 69.82  |     |
| CGR5510   | 19 | 70.57  |     |
| DC40130   | 19 | 70.57  |     |
| PGML04278 | 19 | 72.10  |     |
| DPL0169   | 19 | 73.37  | Yes |
| BNL1690   | 19 | 74.52  |     |
| MUCS517   | 19 | 75.38  |     |
| HAU1653   | 19 | 77.46  |     |
| Gh229     | 19 | 79.42  |     |
| BNL0285   | 19 | 80.80  | Yes |
| SWU0091   | 19 | 82.07  |     |
| CICR0065a | 19 | 83.60  |     |
| HAU2783   | 19 | 84.10  |     |
| PGML04402 | 19 | 84.34  |     |
| NAU2380   | 19 | 85.88  |     |
| DPL0444   | 19 | 88.23  | Yes |
| PGML03051 | 19 | 89.24  |     |
| PGML03375 | 19 | 89.24  |     |
| DPL0145   | 19 | 91.59  |     |
| BNL1064   | 19 | 99.97  | Yes |
| CER0148   | 19 | 106.24 |     |
| BNL0852   | 19 | 106.48 |     |
| CIR139a   | 19 | 106.98 |     |
| CICR0183  | 19 | 107.47 |     |
| CICR0274  | 19 | 107.47 |     |
| CICR0609  | 19 | 107.47 |     |
| HAU0878   | 19 | 107.47 |     |
| MGHES70   | 19 | 107.47 |     |
| CICR0654  | 19 | 107.72 |     |
| NAU1221   | 19 | 108.21 |     |
| CGR5732   | 19 | 108.46 |     |
| CICR0203  | 19 | 108.46 |     |
| CICR0262  | 19 | 108.46 |     |
| CICR0292  | 19 | 108.46 |     |
| CICR0515  | 19 | 108.46 |     |
| NAU0792   | 19 | 108.46 |     |
| NAU0828   | 19 | 108.56 |     |
| CICR0710  | 19 | 108.70 |     |
| CICR0734  | 19 | 110.24 |     |
| CICR0616  | 19 | 111.77 |     |
| CICR0826  | 19 | 113.85 |     |
| DPL0540   | 19 | 116.48 | Yes |
| Gh109     | 19 | 117.28 |     |
| NAU5330   | 19 | 123.02 |     |
| NAU3497   | 19 | 131.02 | Yes |
| DPL0210a  | 19 | 137.52 |     |
| CGR6128   | 19 | 142.63 |     |
| CICR0906  | 19 | 142.88 |     |
| PGML00845 | 19 | 143.89 |     |
| BNL3903   | 19 | 145.03 |     |
| NAU5475   | 19 | 145.90 | Yes |
| HAU1952   | 19 | 146.15 |     |
| NAU2959   | 19 | 146.15 |     |
| PGML03255 | 19 | 148.23 |     |
| HAU2616   | 19 | 149.23 |     |
| DPL0064   | 19 | 150.24 |     |
| NAU5299   | 19 | 152.88 |     |
| CIR062    | 19 | 153.37 |     |
| HAU1071b  | 19 | 153.62 | Yes |
| NAU5005   | 19 | 154.62 |     |
| NAU6406   | 19 | 155.89 |     |

|            |    |        |     |
|------------|----|--------|-----|
| NAU6619    | 19 | 156.14 |     |
| CICR0333   | 19 | 156.88 |     |
| DPL0215    | 19 | 161.66 | Yes |
| CGR6250    | 19 | 166.63 |     |
| DPL0040a   | 19 | 169.97 | Yes |
| PGML02574  | 19 | 170.22 |     |
| DPL0155b   | 19 | 173.75 |     |
| TMB0131a   | 19 | 178.16 |     |
| NAU3698    | 19 | 178.69 |     |
| CER0090    | 19 | 178.94 |     |
| DPL0192    | 19 | 179.43 |     |
| BNL1878    | 19 | 179.68 | Yes |
| DPL0143    | 19 | 179.68 |     |
| TMB1282    | 19 | 179.68 |     |
| CGR6088    | 19 | 182.32 |     |
| HAU1385b   | 19 | 185.54 |     |
| NAU5489    | 19 | 189.99 | Yes |
| DPL0174a   | 19 | 192.07 |     |
| NAU0986    | 19 | 196.20 |     |
| HAU0470    | 19 | 196.45 |     |
| NAU2274    | 19 | 196.95 | Yes |
| CGR6835    | 19 | 196.95 |     |
| NAU3096    | 19 | 196.95 |     |
| Gh354      | 19 | 202.73 | Yes |
| PGML00967  | 19 | 204.53 |     |
| PGML01057  | 19 | 205.80 |     |
| PGML03194a | 19 | 211.58 |     |
| DPL0908b   | 19 | 219.12 |     |
| NAU3652    | 19 | 221.30 | Yes |
| SHIN-0685  | 19 | 222.31 |     |
| NAU2650    | 19 | 223.84 |     |
| PGML03762  | 19 | 225.64 |     |
| NAU6318    | 19 | 226.14 |     |
| DPL0163    | 19 | 226.38 |     |
| PGML04339  | 19 | 226.63 |     |
| NAU6466    | 19 | 230.45 |     |
| DPL0137b   | 19 | 235.23 |     |
| PGML04363  | 19 | 235.98 |     |
| Gh447      | 19 | 237.78 | Yes |
| PGML04977  | 19 | 241.30 |     |
| BNL3535    | 19 | 242.78 | Yes |
| BNL3347    | 19 | 245.20 |     |
| CMO42      | 19 | 245.20 |     |
| DPL0788    | 19 | 245.20 |     |
| JESPR236   | 19 | 245.20 |     |
| DPL0271    | 19 | 248.13 |     |
| MUSS138    | 19 | 253.25 |     |
| NAU3110    | 19 | 253.50 |     |
| NAU1102    | 19 | 253.74 |     |
| PGML03410  | 19 | 256.10 |     |
| COT125     | 19 | 256.59 |     |
| HAU1785    | 19 | 257.09 | Yes |
| CGR5126    | 19 | 259.73 | Yes |
| PGML01289  | 19 | 261.26 |     |
| SHIN-0256  | 19 | 264.19 |     |
| TMB1600    | 19 | 264.69 | Yes |
| TMB1437    | 19 | 264.69 |     |
| PGML00973  | 19 | 267.33 | Yes |
| PGML03369b | 19 | 269.40 |     |
| PGML03369a | 19 | 278.22 | Yes |
| DC40425    | 19 | 290.77 |     |

|            |    |        |     |
|------------|----|--------|-----|
| BNL3089    | 19 | 292.56 | Yes |
| HAU1400    | 19 | 294.12 |     |
| CGR5106b   | 20 | 0.00   | Yes |
| HAU1058b   | 20 | 5.86   | Yes |
| CGR5565a   | 20 | 12.33  | Yes |
| HAU0156    | 20 | 14.69  |     |
| HAU1348    | 20 | 15.13  |     |
| PGML01062  | 20 | 15.35  |     |
| CIR094     | 20 | 16.10  |     |
| NAU5307    | 20 | 20.08  | Yes |
| CICR0254   | 20 | 22.19  |     |
| NAU4071    | 20 | 23.56  | Yes |
| HAU0773    | 20 | 26.18  | Yes |
| CGR6040    | 20 | 26.18  |     |
| CICR0886b  | 20 | 28.28  |     |
| DPL0486    | 20 | 32.27  |     |
| PGML01943  | 20 | 34.04  |     |
| PGML03124  | 20 | 35.03  |     |
| DPL0394    | 20 | 37.91  |     |
| SWU1259a   | 20 | 38.36  |     |
| HAU2700    | 20 | 38.36  |     |
| CGR5237    | 20 | 41.78  | Yes |
| HAU1969    | 20 | 46.35  |     |
| NAU4918    | 20 | 48.21  |     |
| HAU1423b   | 20 | 53.07  |     |
| SHIN-0087b | 20 | 57.92  |     |
| NAU2698    | 20 | 58.38  |     |
| NAU3434    | 20 | 60.49  | Yes |
| NAU4973    | 20 | 61.86  |     |
| HAU0019    | 20 | 62.31  |     |
| CICR0319   | 20 | 64.16  |     |
| DPL0037    | 20 | 66.75  |     |
| HAU0175    | 20 | 67.22  |     |
| HAU2753    | 20 | 68.12  |     |
| NAU5013    | 20 | 68.34  | Yes |
| CICR1000   | 20 | 68.79  |     |
| COT027     | 20 | 71.15  |     |
| NAU6234    | 20 | 80.62  |     |
| PGML01142  | 20 | 88.43  |     |
| CGR5508    | 20 | 90.34  |     |
| NAU1005    | 20 | 90.34  |     |
| BNL3948    | 20 | 91.15  |     |
| CGR5740    | 20 | 91.68  | Yes |
| Gh119      | 20 | 96.25  | Yes |
| PGML03483  | 20 | 97.15  |     |
| NAU6365    | 20 | 97.82  |     |
| HAU2178    | 20 | 98.04  |     |
| MUCS511    | 20 | 98.26  |     |
| JESPR171   | 20 | 98.57  |     |
| PGML04611a | 20 | 99.15  |     |
| PGML02370  | 20 | 99.37  |     |
| PGML04313  | 20 | 100.27 |     |
| NAU3574    | 20 | 104.25 |     |
| HAU1491b   | 20 | 113.72 | Yes |
| HAU3201    | 20 | 121.61 | Yes |
| HAU1491a   | 20 | 139.90 | Yes |
| NAU3813b   | 20 | 152.59 | Yes |
| TMB1831    | 20 | 159.69 |     |
| TMB1629    | 20 | 161.61 |     |
| CICR0068   | 20 | 162.31 |     |
| TMB1125    | 20 | 162.96 | Yes |

|            |    |        |     |
|------------|----|--------|-----|
| MUSS347    | 20 | 163.65 |     |
| NAU4928    | 20 | 164.32 |     |
| CGR6522b   | 20 | 164.54 |     |
| NAU3813a   | 20 | 164.76 |     |
| DPL0361    | 20 | 165.90 |     |
| PGML00696a | 20 | 166.34 |     |
| PGML02892  | 20 | 170.33 |     |
| NAU3665    | 20 | 175.52 | Yes |
| NAU6215    | 20 | 176.42 |     |
| BNL0119    | 20 | 176.64 |     |
| HAU0230b   | 20 | 180.06 |     |
| NAU2893    | 20 | 187.60 | Yes |
| Gh048      | 20 | 194.00 | Yes |
| C2-0133b   | 20 | 196.69 |     |
| DPL0442    | 20 | 200.39 | Yes |
| HAU1670    | 20 | 202.50 |     |
| HAU1516a   | 20 | 202.72 |     |
| CGR6930b   | 20 | 204.33 |     |
| PGML03605  | 20 | 212.22 |     |
| HAU0218a   | 20 | 214.33 |     |
| NAU6448    | 20 | 215.46 |     |
| NAU6305    | 20 | 215.68 |     |
| NAU6449    | 20 | 215.68 |     |
| CGR5349a   | 20 | 220.86 |     |
| HAU2543    | 20 | 221.53 | Yes |
| CGR6701    | 20 | 223.15 | Yes |
| DC40266    | 20 | 227.72 | Yes |
| CGR6110    | 20 | 228.16 |     |
| DPL0320    | 21 | 0.00   | Yes |
| CICR0187   | 21 | 13.24  |     |
| CGR5113a   | 21 | 14.89  |     |
| NAU3377    | 21 | 14.89  |     |
| HAU1484    | 21 | 15.12  | Yes |
| DPL0717    | 21 | 19.48  |     |
| CGR5747b   | 21 | 31.48  |     |
| CGR5747a   | 21 | 33.13  |     |
| SHIN-1579  | 21 | 33.82  | Yes |
| CICR0717   | 21 | 40.37  | Yes |
| HAU1018    | 21 | 43.68  | Yes |
| DPL0522    | 21 | 44.60  |     |
| PGML01055  | 21 | 45.52  |     |
| CGR5097    | 21 | 48.74  |     |
| NAU4003    | 21 | 51.42  | Yes |
| DPL0131    | 21 | 54.10  |     |
| CGR5217    | 21 | 57.89  | Yes |
| DPL0582    | 21 | 60.04  |     |
| CGR6697a   | 21 | 60.73  |     |
| NAU3731    | 21 | 62.63  | Yes |
| HAU1703    | 21 | 65.85  |     |
| NAU3156    | 21 | 66.77  | Yes |
| NAU3381    | 21 | 75.62  |     |
| BNL3147    | 21 | 83.25  |     |
| HAU0720    | 21 | 84.95  |     |
| BNL3449    | 21 | 86.60  |     |
| HAU0423    | 21 | 86.60  |     |
| BNL3171    | 21 | 86.86  | Yes |
| MUSS245    | 21 | 90.05  |     |
| PGML04105b | 21 | 96.66  |     |
| PGML04104  | 21 | 97.35  |     |
| NAU4014    | 21 | 100.57 |     |
| NAU2141    | 21 | 102.72 | Yes |

|            |    |        |     |
|------------|----|--------|-----|
| CICR0046   | 21 | 103.67 |     |
| Gh074a     | 21 | 111.31 | Yes |
| DC40250    | 21 | 120.05 | Yes |
| HAU0200    | 21 | 121.53 |     |
| NAU6222    | 21 | 122.22 |     |
| CGR5602    | 21 | 123.37 |     |
| CGR5085    | 21 | 125.27 |     |
| TMB2493    | 21 | 128.49 |     |
| CM023      | 21 | 128.95 | Yes |
| HAU1124    | 21 | 130.85 |     |
| HAU2026    | 21 | 131.53 |     |
| PGML00302  | 21 | 132.45 |     |
| TMB1264    | 21 | 133.14 |     |
| NAU4855    | 21 | 133.64 | Yes |
| PGML01618  | 21 | 135.23 |     |
| DPL0867    | 21 | 137.13 |     |
| CGR5800    | 21 | 140.92 |     |
| PGML01505  | 21 | 145.59 |     |
| CGR5233    | 21 | 146.99 |     |
| NAU5217    | 21 | 147.91 | Yes |
| TMB2038    | 21 | 147.91 |     |
| HAU3303    | 21 | 148.59 |     |
| CGR6799a   | 21 | 149.28 |     |
| NAU6178    | 21 | 149.28 |     |
| DPL0500    | 21 | 151.69 |     |
| TMB1976    | 21 | 153.70 | Yes |
| HAU1805    | 21 | 158.12 |     |
| DC40025    | 21 | 164.37 | Yes |
| NAU3354a   | 21 | 178.96 | Yes |
| NAU4026    | 21 | 194.22 | Yes |
| DPL0212b   | 21 | 203.48 |     |
| DPL0212a   | 21 | 204.40 |     |
| TMB0400    | 21 | 208.55 |     |
| NAU6282    | 21 | 209.20 |     |
| NAU6224    | 21 | 209.65 |     |
| CIR068     | 21 | 209.88 | Yes |
| HAU3041    | 21 | 209.88 |     |
| HAU3207    | 21 | 209.88 |     |
| NAU4004    | 21 | 209.88 |     |
| HAU3138    | 21 | 210.10 |     |
| DPL0474    | 21 | 210.78 |     |
| SWU0304    | 21 | 211.47 |     |
| PGML03706a | 21 | 213.88 | Yes |
| PGML01089  | 21 | 218.55 |     |
| CICR0383   | 21 | 235.09 | Yes |
| PGML00972  | 21 | 238.32 | Yes |
| CGR5866    | 21 | 239.96 |     |
| Gh132      | 21 | 241.43 | Yes |
| NAU0862    | 21 | 246.17 |     |
| NAU6315    | 21 | 250.41 |     |
| BNL3279    | 21 | 252.43 | Yes |
| NAU6431    | 21 | 255.53 |     |
| NAU6530    | 21 | 257.43 | Yes |
| NAU6697    | 21 | 258.11 |     |
| NAU6520    | 21 | 258.57 |     |
| CER0153a   | 21 | 262.66 |     |
| HAU1660    | 21 | 266.75 | Yes |
| DPL0904    | 21 | 267.43 |     |
| CGR5739    | 21 | 268.12 |     |
| CGR5400    | 21 | 271.67 |     |
| HAU1283a   | 21 | 278.28 | Yes |

|           |    |        |     |
|-----------|----|--------|-----|
| HAU1809a  | 21 | 278.73 | Yes |
| CICR0282  | 21 | 278.73 |     |
| DC40316   | 21 | 279.95 |     |
| PGML01580 | 22 | 0.00   | Yes |
| PGML03193 | 22 | 3.39   |     |
| PGML03923 | 22 | 11.32  |     |
| BNL0448   | 22 | 14.20  | Yes |
| TMB1958   | 22 | 14.20  |     |
| Gh641     | 22 | 15.23  |     |
| PGML04380 | 22 | 18.10  |     |
| CGR6410   | 22 | 21.23  |     |
| NAU2026   | 22 | 21.84  | Yes |
| NAU4900   | 22 | 22.66  |     |
| PGML01941 | 22 | 24.13  |     |
| NAU3781   | 22 | 25.60  |     |
| DPL0055   | 22 | 25.80  |     |
| CICR0482  | 22 | 26.00  |     |
| Gh022     | 22 | 26.00  |     |
| Gh200     | 22 | 26.20  | Yes |
| Gh591b    | 22 | 27.67  |     |
| CGR5150   | 22 | 32.68  |     |
| NAU2302   | 22 | 33.93  |     |
| NAU4062   | 22 | 33.93  |     |
| NAU3824b  | 22 | 34.13  | Yes |
| NAU5099   | 22 | 40.06  | Yes |
| NAU6578   | 22 | 49.11  |     |
| NAU2376   | 22 | 52.74  | Yes |
| NAU6237   | 22 | 52.74  |     |
| PGML00787 | 22 | 53.57  |     |
| Gh166a    | 22 | 54.39  |     |
| PGML01939 | 22 | 54.40  |     |
| CGR5463   | 22 | 54.79  |     |
| Gh052     | 22 | 54.99  |     |
| HAU3012   | 22 | 55.81  |     |
| DC20081   | 22 | 57.06  |     |
| NAU3323   | 22 | 58.09  |     |
| PGML03345 | 22 | 58.70  |     |
| NAU3942   | 22 | 59.52  |     |
| NAU2945   | 22 | 59.93  |     |
| JESPR230  | 22 | 62.52  | Yes |
| STV191    | 22 | 64.49  |     |
| DPL0489   | 22 | 66.18  |     |
| MUSS066   | 22 | 77.76  | Yes |
| PGML02811 | 22 | 96.80  | Yes |
| DPL0107b  | 22 | 105.37 | Yes |
| PGML04355 | 22 | 105.99 |     |
| CGR5806   | 22 | 106.60 |     |
| NAU2783   | 22 | 107.63 |     |
| CIR224a   | 22 | 108.24 | Yes |
| NAU6240   | 22 | 109.93 |     |
| PGML04045 | 22 | 111.18 |     |
| PGML00767 | 22 | 111.59 |     |
| HAU3083   | 22 | 113.98 |     |
| HAU0747   | 22 | 115.01 |     |
| PGML04137 | 22 | 116.70 |     |
| CICR0887  | 22 | 118.40 |     |
| DPL0515   | 22 | 119.43 |     |
| DC40071   | 22 | 120.04 |     |
| CGR5566   | 22 | 120.45 |     |
| HAU1832   | 22 | 121.70 | Yes |
| CGR6791   | 22 | 124.96 |     |

|            |    |        |     |
|------------|----|--------|-----|
| NAU2932    | 22 | 136.29 | Yes |
| NAU5294    | 22 | 141.00 |     |
| NAU2977    | 22 | 142.70 | Yes |
| HAU1071a   | 22 | 143.95 |     |
| TMB0206    | 22 | 144.59 |     |
| NAU3791    | 22 | 148.48 |     |
| CER0139b   | 22 | 149.73 |     |
| PGML00036  | 22 | 150.55 |     |
| CICR0438   | 22 | 151.58 |     |
| NAU1325    | 22 | 152.64 | Yes |
| PGML01868b | 23 | 0.00   | Yes |
| MUSB0442   | 23 | 23.95  | Yes |
| PGML04758  | 23 | 31.42  | Yes |
| CGR5626    | 23 | 38.56  |     |
| NAU3888a   | 23 | 39.84  | Yes |
| BNL0686a   | 23 | 40.92  |     |
| DC20058    | 23 | 41.09  |     |
| HAU2382    | 23 | 42.18  | Yes |
| CICR0425   | 23 | 56.61  |     |
| TMB2354    | 23 | 61.72  |     |
| TMB2862    | 23 | 65.09  | Yes |
| CGR6840    | 23 | 65.34  |     |
| CGR6122    | 23 | 65.61  |     |
| CIR060     | 23 | 65.61  |     |
| DPL0079    | 23 | 66.14  |     |
| CIR383     | 23 | 66.49  |     |
| PGML01317  | 23 | 66.66  |     |
| NAU6279    | 23 | 67.37  |     |
| NAU6701    | 23 | 68.08  |     |
| NAU6564    | 23 | 68.61  |     |
| NAU6508    | 23 | 68.96  |     |
| JESPR151   | 23 | 70.02  | Yes |
| HAU2067    | 23 | 71.52  |     |
| PGML03706b | 23 | 73.38  |     |
| PGML00689  | 23 | 78.76  | Yes |
| Gh499      | 23 | 86.90  | Yes |
| STV188     | 23 | 94.71  | Yes |
| PGML01040  | 23 | 111.81 | Yes |
| CICR0237   | 23 | 122.69 |     |
| PGML00410b | 23 | 125.62 |     |
| PGML01044  | 23 | 126.70 |     |
| TMB2943    | 23 | 127.05 |     |
| CGR6087    | 23 | 127.57 |     |
| TMB2901    | 23 | 127.92 | Yes |
| NAU3986    | 23 | 128.10 |     |
| NAU4079    | 23 | 128.10 |     |
| PGML04407  | 23 | 128.10 |     |
| PGML02507  | 23 | 128.63 |     |
| CGR5552    | 23 | 131.55 | Yes |
| NAU5508    | 23 | 135.39 |     |
| CICR0516   | 23 | 136.10 |     |
| NAU5472    | 23 | 136.45 |     |
| PGML01868a | 23 | 136.65 | Yes |
| DPL0498    | 23 | 137.52 |     |
| DPL0378    | 23 | 140.23 | Yes |
| PGML03013  | 23 | 140.75 |     |
| CGR6252b   | 23 | 141.46 |     |
| TMB0764    | 23 | 142.36 |     |
| TMB1425    | 23 | 142.36 |     |
| CGR6576    | 23 | 143.63 |     |
| CGR5218    | 23 | 143.98 |     |



|           |    |        |     |
|-----------|----|--------|-----|
| CGR6714   | 23 | 144.88 |     |
| CICR0508  | 23 | 146.94 |     |
| SHIN-0154 | 23 | 148.02 |     |
| CGR6876   | 23 | 148.73 |     |
| CICR0230  | 23 | 149.44 |     |
| CGR6943   | 23 | 154.82 |     |
| BNL3140   | 23 | 155.21 | Yes |
| PGML02830 | 23 | 164.03 |     |
| DC40085   | 23 | 168.32 |     |
| CGR5494   | 23 | 169.65 |     |
| NAU0936   | 23 | 170.54 | Yes |
| PGML02989 | 23 | 170.89 |     |
| HAU1085   | 23 | 171.60 |     |
| HAU0261   | 23 | 171.77 |     |
| SHIN-0444 | 23 | 172.86 |     |
| MUCS133   | 23 | 175.56 |     |
| NAU0859   | 23 | 175.78 | Yes |
| CGR5392   | 23 | 176.63 |     |
| CICR0850  | 23 | 176.63 |     |
| DPL0044   | 23 | 176.63 |     |
| MUSS050   | 23 | 179.11 | Yes |
| MUSS068   | 23 | 183.20 |     |
| DPL0262   | 23 | 188.04 | Yes |
| NAU3414   | 23 | 197.66 |     |
| HAU1028   | 23 | 203.32 |     |
| DPL0627c  | 23 | 204.59 |     |
| NAU3829   | 23 | 205.48 |     |
| CGR5862   | 23 | 205.66 | Yes |
| NAU5189   | 23 | 208.14 | Yes |
| CGR6806   | 23 | 208.68 |     |
| PGML01613 | 23 | 210.15 |     |
| DPL0524b  | 23 | 212.63 | Yes |
| DPL0514a  | 23 | 219.41 | Yes |
| HAU1162   | 23 | 220.72 |     |
| DPL0031   | 24 | 0.00   | Yes |
| HAU1432   | 24 | 6.95   | Yes |
| PGML02369 | 24 | 7.40   |     |
| CGR6147   | 24 | 10.42  |     |
| PGML04429 | 24 | 18.47  |     |
| DPL0841b  | 24 | 22.75  |     |
| NAU2230   | 24 | 23.97  | Yes |
| CICR0038  | 24 | 24.12  |     |
| MUSB0175  | 24 | 24.87  |     |
| PGML01280 | 24 | 26.41  |     |
| MUSS021   | 24 | 26.57  |     |
| BNL3627a  | 24 | 26.57  |     |
| HAU0755   | 24 | 26.57  |     |
| PGML04400 | 24 | 27.32  |     |
| PGML04398 | 24 | 27.32  |     |
| BNL1646b  | 24 | 28.01  | Yes |
| BNL1646a  | 24 | 31.57  | Yes |
| NAU3324b  | 24 | 38.12  | Yes |
| NAU5031   | 24 | 48.39  | Yes |
| CGR5695   | 24 | 51.60  | Yes |
| Gh573     | 24 | 54.24  |     |
| NAU6389   | 24 | 55.47  |     |
| CGR5503   | 24 | 56.21  |     |
| DPL0251   | 24 | 57.12  |     |
| CGR5433   | 24 | 57.56  |     |
| MUSB0255  | 24 | 58.00  | Yes |
| DPL0627b  | 24 | 59.91  |     |

|           |    |        |     |
|-----------|----|--------|-----|
| PGML02987 | 24 | 61.30  |     |
| NAU6183   | 24 | 61.49  |     |
| Gh465     | 24 | 61.89  |     |
| JESPR127  | 24 | 62.03  |     |
| CGR5120   | 24 | 62.33  |     |
| CICR0258  | 24 | 62.47  |     |
| HAU1905   | 24 | 62.47  |     |
| CGR5230   | 24 | 62.91  |     |
| NAU6616   | 24 | 63.36  |     |
| NAU3988   | 24 | 63.65  |     |
| NAU2631   | 24 | 63.79  |     |
| SHIN-1457 | 24 | 63.99  |     |
| NAU6169   | 24 | 64.38  |     |
| PGML01755 | 24 | 64.82  |     |
| NAU6166   | 24 | 65.11  |     |
| DPL0877   | 24 | 65.41  |     |
| NAU2619   | 24 | 65.55  |     |
| NAU5335   | 24 | 66.15  |     |
| DC40127   | 24 | 66.74  |     |
| CGR5165   | 24 | 67.18  |     |
| Gh237     | 24 | 67.63  |     |
| NAU6235   | 24 | 67.63  |     |
| PGML02630 | 24 | 73.34  | Yes |
| HAU2086b  | 24 | 84.08  | Yes |
| Gh171a    | 24 | 90.37  | Yes |
| CER0152a  | 24 | 93.00  |     |
| NAU3207   | 24 | 93.15  |     |
| NAU2914   | 24 | 93.44  | Yes |
| HAU3346b  | 24 | 93.58  |     |
| PGML01561 | 24 | 93.88  |     |
| PGML00602 | 24 | 94.32  |     |
| DPL0133   | 24 | 96.05  |     |
| DC20017   | 24 | 97.02  |     |
| TMB0429   | 24 | 101.73 |     |
| HAU0722   | 24 | 104.41 |     |
| DPL0534   | 24 | 105.35 |     |
| PGML03854 | 24 | 108.73 | Yes |
| NAU2434   | 24 | 113.72 |     |
| SHIN-0697 | 24 | 115.11 |     |
| NAU3804   | 24 | 115.70 | Yes |
| NAU3071   | 24 | 115.85 |     |
| HAU1846   | 24 | 116.14 |     |
| NAU0858   | 24 | 116.14 |     |
| MUSS277   | 24 | 116.43 |     |
| PGML04332 | 24 | 118.88 |     |
| NAU3721   | 24 | 119.63 |     |
| HAU3247   | 24 | 120.22 |     |
| PGML01384 | 24 | 120.22 |     |
| HAU2015b  | 24 | 120.51 |     |
| CGR5127   | 24 | 120.66 |     |
| NAU3562   | 24 | 120.95 | Yes |
| MUSS500   | 24 | 123.21 |     |
| NAU3424   | 24 | 128.68 | Yes |
| DPL0214b  | 24 | 133.89 |     |
| NAU5399   | 24 | 134.95 | Yes |
| NAU4099   | 24 | 136.51 |     |
| NAU3201a  | 24 | 136.81 |     |
| CGR5813   | 24 | 137.40 |     |
| NAU1302   | 24 | 138.31 | Yes |
| CICR0953a | 24 | 138.90 |     |
| HAU0155   | 24 | 138.90 |     |

|            |    |        |     |
|------------|----|--------|-----|
| HAU2738    | 24 | 138.90 |     |
| CICR0628a  | 24 | 139.97 |     |
| SHIN-0384  | 24 | 141.70 |     |
| PGML04154a | 24 | 142.92 |     |
| DC40229    | 24 | 146.49 |     |
| NAU2033b   | 24 | 148.62 |     |
| CGR5447    | 24 | 148.77 |     |
| HAU1621    | 24 | 148.77 |     |
| BNL3860    | 24 | 152.58 |     |
| NAU3158    | 24 | 153.52 | Yes |
| PGML01371  | 24 | 153.96 |     |
| DPL0461    | 24 | 154.26 |     |
| DPL0068    | 24 | 155.01 |     |
| NAU2033a   | 24 | 155.76 |     |
| NAU5282    | 24 | 156.70 |     |
| PGML04733  | 24 | 160.07 |     |
| CICR0673   | 24 | 160.66 |     |
| PGML04093  | 24 | 161.89 |     |
| NAU3287    | 24 | 162.64 | Yes |
| SWU0204    | 24 | 162.93 |     |
| CGR5423    | 24 | 169.19 |     |
| DPL0152a   | 24 | 169.94 |     |
| SHIN-1494b | 24 | 170.53 | Yes |
| DPL0465    | 25 | 0.00   | Yes |
| CGR6679    | 25 | 2.36   |     |
| PGML03690  | 25 | 3.63   |     |
| BNL0827    | 25 | 4.94   | Yes |
| BNL1047    | 25 | 13.16  | Yes |
| CICR0507   | 25 | 15.45  |     |
| CGR5525a   | 25 | 17.39  |     |
| CGR6584    | 25 | 19.10  |     |
| DPL0702    | 25 | 20.14  |     |
| CGR6932a   | 25 | 20.14  |     |
| PGML02296  | 25 | 20.34  | Yes |
| TMB0338    | 25 | 21.38  |     |
| CGR5115    | 25 | 22.00  |     |
| DPL0918b   | 25 | 22.61  |     |
| DPL0441    | 25 | 22.81  |     |
| CGR5643    | 25 | 23.22  |     |
| DPL0166a   | 25 | 24.05  |     |
| CICR0701   | 25 | 24.45  |     |
| Gh537      | 25 | 25.50  | Yes |
| Gh591a     | 25 | 26.98  |     |
| SHIN-0885  | 25 | 27.59  |     |
| BNL3806    | 25 | 28.44  |     |
| CGR5201a   | 25 | 29.03  | Yes |
| TMB0313    | 25 | 30.74  |     |
| SHIN-1131  | 25 | 32.96  |     |
| SWU0903    | 25 | 34.00  | Yes |
| DPL0387    | 25 | 34.62  |     |
| CER0027    | 25 | 36.32  |     |
| DC40429    | 25 | 36.32  |     |
| HAU2759    | 25 | 36.52  |     |
| BNL1440a   | 25 | 37.14  | Yes |
| Gh220      | 25 | 37.97  |     |
| JESPR215   | 25 | 40.33  |     |
| Gh224      | 25 | 41.45  |     |
| CGR5100    | 25 | 43.23  | Yes |
| PGML04648  | 25 | 49.10  | Yes |
| DPL0124    | 25 | 59.41  | Yes |
| HAU1783    | 25 | 79.16  | Yes |

|           |    |        |     |
|-----------|----|--------|-----|
| DPL0243b  | 25 | 84.26  |     |
| CER0086b  | 25 | 94.57  | Yes |
| MUSS275   | 25 | 104.13 |     |
| NAU0905b  | 25 | 108.38 | Yes |
| NAU6661   | 25 | 109.21 |     |
| DPL0075   | 25 | 110.92 |     |
| Gh515     | 25 | 111.85 |     |
| NAU6398   | 25 | 113.00 |     |
| DPL0519   | 25 | 113.62 |     |
| PGML01304 | 25 | 114.66 | Yes |
| PGML03353 | 25 | 115.92 |     |
| TMB0436   | 25 | 115.92 |     |
| PGML04301 | 25 | 118.82 |     |
| HAU1948   | 25 | 120.76 |     |
| NAU2104   | 25 | 120.76 |     |
| NAU2378   | 25 | 120.76 |     |
| NAU2581a  | 25 | 120.76 |     |
| NAU2581b  | 25 | 120.76 |     |
| NAU2963   | 25 | 120.76 |     |
| DPL0290   | 25 | 122.46 |     |
| DPL0244   | 25 | 124.40 |     |
| NAU2565   | 25 | 125.01 | Yes |
| HAU1931   | 25 | 126.38 |     |
| CICR0461a | 25 | 127.51 |     |
| PGML04555 | 25 | 127.73 |     |
| NAU3588   | 25 | 127.94 |     |
| CGR6479   | 25 | 128.55 |     |
| CGR6799b  | 25 | 129.17 |     |
| NAU2397   | 25 | 132.06 | Yes |
| HAU3258   | 25 | 132.06 |     |
| NAU3803a  | 25 | 132.26 |     |
| DPL0705b  | 25 | 136.47 | Yes |
| CGR6866   | 25 | 142.42 |     |
| DPL0257a  | 25 | 144.83 |     |
| PGML02460 | 25 | 145.45 |     |
| NAU1204   | 25 | 149.37 | Yes |
| DPL0282   | 25 | 151.31 |     |
| NAU4959   | 25 | 159.26 |     |
| TMB1448   | 25 | 159.36 |     |
| COT070    | 25 | 159.46 |     |
| DC40140   | 25 | 160.80 | Yes |
| NAU1100   | 26 | 0.00   | Yes |
| HAU1845   | 26 | 4.47   |     |
| NAU2920   | 26 | 4.62   | Yes |
| NAU4925   | 26 | 8.20   | Yes |
| DC40080   | 26 | 13.15  |     |
| CICR0323  | 26 | 13.45  |     |
| HAU1942   | 26 | 13.76  | Yes |
| CGR6772   | 26 | 14.87  |     |
| DC20086   | 26 | 15.82  |     |
| NAU4090   | 26 | 16.13  | Yes |
| PGML00199 | 26 | 17.84  |     |
| CGR5733   | 26 | 20.51  |     |
| NAU0837   | 26 | 20.51  |     |
| DPL0243a  | 26 | 23.46  |     |
| DPL0569   | 26 | 27.93  |     |
| DPL0888   | 26 | 29.57  |     |
| PGML00811 | 26 | 31.38  |     |
| NAU2356   | 26 | 33.19  | Yes |
| MUSS303   | 26 | 33.97  |     |
| NAU6161   | 26 | 34.44  |     |

|            |    |        |     |
|------------|----|--------|-----|
| DC40116    | 26 | 36.99  |     |
| HAU0677    | 26 | 38.99  |     |
| HAU2322    | 26 | 39.14  |     |
| NAU5425    | 26 | 39.29  |     |
| BNL0840    | 26 | 39.53  |     |
| CICR0371   | 26 | 39.75  |     |
| HAU2730a   | 26 | 40.53  |     |
| DPL0817    | 26 | 42.52  |     |
| PGML01594a | 26 | 44.70  |     |
| CGR5678    | 26 | 45.65  |     |
| CGR5527    | 26 | 45.80  |     |
| CIR039     | 26 | 45.86  |     |
| DPL0866b   | 26 | 45.95  |     |
| CGR5991    | 26 | 46.41  |     |
| PGML02408  | 26 | 46.87  |     |
| HAU1855    | 26 | 46.87  |     |
| DPL0796b   | 26 | 47.34  |     |
| CGR6872    | 26 | 47.96  |     |
| CGR6728a   | 26 | 49.07  |     |
| CGR6698b   | 26 | 51.83  | Yes |
| DPL0391    | 26 | 56.53  |     |
| BNL3599b   | 26 | 62.45  |     |
| JESPR066   | 26 | 68.16  | Yes |
| DPL0036b   | 26 | 72.67  |     |
| CGR5802    | 26 | 78.13  |     |
| NAU2442    | 26 | 82.84  | Yes |
| DPL0190    | 26 | 85.20  |     |
| PGML03877  | 26 | 87.20  |     |
| PGML02953a | 26 | 89.56  |     |
| SWU1245    | 26 | 91.19  |     |
| SWU1244    | 26 | 92.14  | Yes |
| CICR0669   | 26 | 93.26  |     |
| HAU1513a   | 26 | 95.82  |     |
| PGML04053  | 26 | 97.45  |     |
| PGML01944  | 26 | 98.40  |     |
| PGML04604a | 26 | 99.86  | Yes |
| Gh171b     | 26 | 102.04 | Yes |
| PGML0416   | 26 | 105.20 |     |
| PGML02879  | 26 | 108.56 |     |
| HAU1452    | 26 | 109.43 |     |
| NAU5043    | 26 | 110.56 |     |
| CICR0876   | 26 | 113.00 |     |
| NAU5164a   | 26 | 114.81 | Yes |
| HAU1434a   | 26 | 115.11 |     |
| DC40260    | 26 | 116.06 |     |
| HAU1535    | 26 | 116.68 |     |
| HAU1292    | 26 | 116.99 |     |
| CGR6742b   | 26 | 117.91 |     |
| CGR6702    | 26 | 118.09 | Yes |
| HAU1800    | 26 | 120.08 |     |
| Gh243a     | 26 | 125.53 | Yes |
| CGR6880    | 26 | 132.07 |     |
| CGR6012    | 26 | 133.70 |     |
| MUSS402    | 26 | 138.90 | Yes |
| NAU4912    | 26 | 139.52 |     |
| MUCS064    | 26 | 139.98 |     |
| DPL0380b   | 26 | 140.77 |     |
| NAU2913    | 26 | 141.88 |     |
| BNL0341    | 26 | 143.28 |     |
| MUSS439    | 26 | 143.65 | Yes |
| HAU0723    | 26 | 144.43 |     |

|            |    |        |     |
|------------|----|--------|-----|
| NAU0989    | 26 | 144.73 |     |
| NAU3293    | 26 | 145.68 |     |
| BNL3482    | 26 | 146.89 |     |
| CGR6329    | 26 | 148.29 |     |
| BNL2495    | 26 | 149.57 | Yes |
| CGR6471    | 26 | 150.09 |     |
| SHIN-0053  | 26 | 151.31 |     |
| PGML04562  | 26 | 156.78 |     |
| Gh629      | 26 | 161.99 | Yes |
| DPL0915    | 26 | 165.80 |     |
| NAU4914    | 26 | 168.76 |     |
| CICR0721   | 26 | 169.38 |     |
| NAU3905    | 26 | 169.38 |     |
| NAU5462    | 26 | 169.53 |     |
| PGML04182  | 26 | 170.99 | Yes |
| DPL0890    | 26 | 171.61 |     |
| CGR5699    | 26 | 171.92 |     |
| CGR6759    | 26 | 172.87 |     |
| PGML02118  | 26 | 177.36 |     |
| NAU2715    | 26 | 185.82 | Yes |
| PGML04604b | 26 | 201.83 |     |
| BNL3537    | 26 | 206.56 | Yes |
| NAU3860    | 26 | 208.60 |     |
| CICR0266   | 26 | 209.06 |     |
| DPL0404    | 26 | 209.85 |     |
| NAU3305    | 26 | 210.96 |     |
| DPL0226    | 26 | 212.42 |     |
| HAU1568    | 26 | 213.04 |     |
| NAU5414    | 26 | 213.34 |     |
| HAU1830    | 26 | 213.97 | Yes |
| COT100     | 26 | 216.34 |     |
| DPL0917b   | 26 | 221.55 | Yes |
| DPL0363    | 26 | 226.84 |     |
| NAU3084    | 26 | 229.82 |     |
| MUSS413    | 26 | 230.60 |     |
| HAU0908    | 26 | 231.39 | Yes |
| C2-0055    | 26 | 232.33 |     |
| CGR5152    | 26 | 233.99 | Yes |

Note: These information from the map reported by Shi et al. 2015
