# Supplementary material for: Examining two sets of introgression lines across multiple environments reveals background-independent and stably expressed quantitative trait loci of fiber quality in cotton
Source: PubMed Central journal article supplement (PMC7311500; doi:10.1007/s00122-020-03578-0), 2020-03-17
Supplement: 122_2020_3578_MOESM5_ESM.pdf [file 122_2020_3578_MOESM5_ESM.pdf]

**Table S2** Correlation analysis of three traits in two populations of CSSLs across multi enviro

| <b>Trait</b> | <b>Pop</b> | <b>Env.</b> | <b>09HNA</b> | <b>10HNA</b> | <b>11HNA</b> | <b>11LN</b>  | <b>11XJS</b> | <b>14XJS</b> | <b>14XJN</b> |              |
|--------------|------------|-------------|--------------|--------------|--------------|--------------|--------------|--------------|--------------|--------------|
| FL           | 36Pop      | 10HNA       | 0.4561***    |              |              |              |              |              |              |              |
| FM           | 36Pop      | 10HNA       | 0.3865***    |              |              |              |              |              |              |              |
| FS           | 36Pop      | 10HNA       | 0.3668***    |              |              |              |              |              |              |              |
| FL           | 36Pop      | 11HNA       | 0.5014***    | 0.6879***    |              |              |              |              |              |              |
| FM           | 36Pop      | 11HNA       | 0.3746***    | 0.7334***    |              |              |              |              |              |              |
| FS           | 36Pop      | 11HNA       | 0.4543***    | 0.5885***    |              |              |              |              |              |              |
| FL           | 36Pop      | 11LN        | 0.5032***    | 0.6581***    | 0.7188***    |              |              |              |              |              |
| FM           | 36Pop      | 11LN        | 0.3065***    | 0.7647***    | 0.6406***    |              |              |              |              |              |
| FS           | 36Pop      | 11LN        | 0.4449***    | 0.5913***    | 0.6115***    |              |              |              |              |              |
| FL           | 36Pop      | 11XJS       | 0.4931***    | 0.6564***    | 0.7200***    | 0.7279***    |              |              |              |              |
| FM           | 36Pop      | 11XJS       | 0.3531***    | 0.6957***    | 0.6538***    | 0.6198***    |              |              |              |              |
| FS           | 36Pop      | 11XJS       | 0.4408***    | 0.6196***    | 0.6658***    | 0.6513***    |              |              |              |              |
| FL           | 36Pop      | 14XJS       | 0.4078***    | 0.5524***    | 0.6293***    | 0.6244***    | 0.6633***    |              |              |              |
| FM           | 36Pop      | 14XJS       | 0.2734***    | 0.6591***    | 0.6536***    | 0.5836***    | 0.6190***    |              |              |              |
| FS           | 36Pop      | 14XJS       | 0.2712***    | 0.4383***    | 0.5163***    | 0.4887***    | 0.5337***    |              |              |              |
| FL           | 36Pop      | 14XJN       | 0.3647***    | 0.5287***    | 0.5261***    | 0.5489***    | 0.5798***    | 0.6056***    |              |              |
| FM           | 36Pop      | 14XJN       | 0.2864***    | 0.6404***    | 0.6109***    | 0.5798***    | 0.5902***    | 0.7229***    |              |              |
| FS           | 36Pop      | 14XJN       | 0.2871***    | 0.4296***    | 0.4139***    | 0.4382***    | 0.4856***    | 0.5508***    |              |              |
| <b>Trait</b> | <b>Pop</b> | <b>Env.</b> | <b>09HNA</b> | <b>10HNA</b> | <b>11HNA</b> | <b>11XJA</b> | <b>14XJA</b> | <b>14XJK</b> | <b>14HNZ</b> | <b>15HNZ</b> |
| FL           | 45Pop      | 10HNA       | 0.4943***    |              |              |              |              |              |              |              |
| FM           | 45Pop      | 10HNA       | 0.3093***    |              |              |              |              |              |              |              |
| FS           | 45Pop      | 10HNA       | 0.2368***    |              |              |              |              |              |              |              |
| FL           | 45Pop      | 11HNA       | 0.4473***    | 0.6156***    |              |              |              |              |              |              |
| FM           | 45Pop      | 11HNA       | 0.2295***    | 0.7535***    |              |              |              |              |              |              |
| FS           | 45Pop      | 11HNA       | 0.4414***    | 0.4358***    |              |              |              |              |              |              |
| FL           | 45Pop      | 11XJA       | 0.4645***    | 0.6893***    | 0.5474***    |              |              |              |              |              |
| FM           | 45Pop      | 11XJA       | 0.1889***    | 0.5534***    | 0.5547***    |              |              |              |              |              |
| FS           | 45Pop      | 11XJA       | 0.5085***    | 0.3807***    | 0.6083***    |              |              |              |              |              |
| FL           | 45Pop      | 14XJA       | 0.3768***    | 0.5121***    | 0.4404***    | 0.5625***    |              |              |              |              |
| FM           | 45Pop      | 14XJA       | 0.2158***    | 0.4895***    | 0.5106***    | 0.3677***    |              |              |              |              |
| FS           | 45Pop      | 14XJA       | 0.4424***    | 0.2903***    | 0.4979***    | 0.5698***    |              |              |              |              |
| FL           | 45Pop      | 14XJK       | 0.4285***    | 0.6190***    | 0.5790***    | 0.6722***    | 0.6357***    |              |              |              |
| FM           | 45Pop      | 14XJK       | 0.2227***    | 0.5261***    | 0.5666***    | 0.4534***    | 0.4558***    |              |              |              |
| FS           | 45Pop      | 14XJK       | 0.3762***    | 0.2479***    | 0.4014***    | 0.4581***    | 0.5107***    |              |              |              |
| FL           | 45Pop      | 14HNZ       | 0.3977***    | 0.6261***    | 0.5577***    | 0.5697***    | 0.4097***    | 0.5385***    |              |              |
| FM           | 45Pop      | 14HNZ       | 0.3369***    | 0.6257***    | 0.7229***    | 0.5420***    | 0.4312***    | 0.5056***    |              |              |
| FS           | 45Pop      | 14HNZ       | 0.3932***    | 0.3017***    | 0.5229***    | 0.5567***    | 0.4291***    | 0.3900***    |              |              |
| FL           | 45Pop      | 15HNZ       | 0.3839***    | 0.5704***    | 0.5091***    | 0.5861***    | 0.3795***    | 0.5284***    | 0.6698***    |              |
| FM           | 45Pop      | 15HNZ       | 0.2171***    | 0.5168***    | 0.5446***    | 0.3693***    | 0.3525***    | 0.3723***    | 0.6807***    |              |
| FS           | 45Pop      | 15HNZ       | 0.3483***    | 0.2726***    | 0.4256***    | 0.4964***    | 0.3771***    | 0.3193***    | 0.5924***    |              |
| FL           | 45Pop      | 15HNA       | 0.3078***    | 0.4936***    | 0.4605***    | 0.3983***    | 0.2699***    | 0.4046***    | 0.5110***    | 0.4031***    |
| FM           | 45Pop      | 15HNA       | 0.2257***    | 0.4679***    | 0.5055***    | 0.4124***    | 0.3291***    | 0.3445***    | 0.5565***    | 0.4558***    |
| FS           | 45Pop      | 15HNA       | 0.3429***    | 0.3247***    | 0.4810***    | 0.5034***    | 0.3490***    | 0.3226***    | 0.4168***    | 0.3718***    |

\*, \*\* and \*\*\*, Significant at  $P \leq 0.05$ ,  $0.01$  and  $0.001$ , respectively; Env. Environment
