# Supplementary material for: Examining two sets of introgression lines across multiple environments reveals background-independent and stably expressed quantitative trait loci of fiber quality in cotton
Source: PubMed Central journal article supplement (PMC7311500; doi:10.1007/s00122-020-03578-0), 2020-03-17
Supplement: 122_2020_3578_MOESM6_ESM.pdf [file 122_2020_3578_MOESM6_ESM.pdf]

**Table S3** Details of all QTLs for three traits of fiber quality in CSSL populations

| QTL name  | Genetic background | Env.  | Chr | Position | Nearest marker | LOD  | PVE(%) | Add   | No. of EE | BI-QTL | previous reports                                                                               |
|-----------|--------------------|-------|-----|----------|----------------|------|--------|-------|-----------|--------|------------------------------------------------------------------------------------------------|
| qFL-C1-1  | CCRI36             | 11LNL | 1   | 10.76    | CGR5417        | 2.68 | 2.94   | -1.61 | 2         |        | Fang et al., 2014                                                                              |
|           | CCRI36             | 11XJS | 1   | 10.76    | CGR5417        | 3.43 | 3.78   | -1.81 | 2         |        |                                                                                                |
| qFL-C2-2  | CCRI36             | 14XJN | 2   | 50.01    | TMB1578        | 2.98 | 3.34   | 1.98  | 1         |        |                                                                                                |
| qFL-C2-4  | CCRI36             | 11HNA | 2   | 137.50   | HAU0880        | 6.82 | 7.41   | 0.43  | 4         |        | Shi et al., 2019                                                                               |
|           | CCRI36             | 11LNL | 2   | 137.50   | HAU0880        | 7.03 | 7.62   | 0.43  | 4         |        |                                                                                                |
|           | CCRI36             | 11XJS | 2   | 137.50   | HAU0880        | 2.53 | 2.83   | 0.26  | 4         |        |                                                                                                |
|           | CCRI36             | 14XJS | 2   | 137.50   | HAU0880        | 3.21 | 3.55   | 0.30  | 4         |        |                                                                                                |
| qFL-C2-6  | CCRI36             | 11LNL | 2   | 178.82   | NAU2277        | 5.20 | 5.68   | 0.56  | 1         | BI-QTL |                                                                                                |
| qFL-C3-1  | CCRI36             | 11HNA | 3   | 57.62    | NAU1190        | 3.28 | 3.62   | 0.41  | 2         |        |                                                                                                |
|           | CCRI36             | 11LNL | 3   | 57.62    | NAU1190        | 3.71 | 4.09   | 0.43  | 2         |        |                                                                                                |
| qFL-C3-2  | CCRI36             | 11HNA | 3   | 114.40   | HAU0195b       | 7.46 | 8.03   | 0.49  | 4         |        |                                                                                                |
|           | CCRI36             | 11LNL | 3   | 114.40   | HAU0195b       | 5.67 | 6.18   | 0.42  | 4         |        |                                                                                                |
|           | CCRI36             | 11XJS | 3   | 114.40   | HAU0195b       | 3.35 | 3.69   | 0.32  | 4         |        |                                                                                                |
|           | CCRI36             | 14XJS | 3   | 114.40   | HAU0195b       | 3.99 | 4.38   | 0.36  | 4         |        |                                                                                                |
| qFL-C5-1  | CCRI36             | 11HNA | 5   | 89.92    | MUSS317        | 6.21 | 6.79   | 0.59  | 5         |        |                                                                                                |
|           | CCRI36             | 11LNL | 5   | 89.92    | MUSS317        | 4.36 | 4.83   | 0.49  | 5         |        |                                                                                                |
|           | CCRI36             | 11XJS | 5   | 89.92    | MUSS317        | 5.60 | 6.15   | 0.54  | 5         |        |                                                                                                |
|           | CCRI36             | 14XJN | 5   | 89.92    | MUSS317        | 2.73 | 3.05   | 0.44  | 5         |        |                                                                                                |
|           | CCRI36             | 14XJS | 5   | 89.92    | MUSS317        | 2.78 | 3.09   | 0.41  | 5         |        |                                                                                                |
| qFL-C5-2  | CCRI36             | 11HNA | 5   | 141.28   | NAU2957        | 4.35 | 4.84   | 0.51  | 4         |        | Zhai et al., 2016                                                                              |
|           | CCRI36             | 11LNL | 5   | 141.28   | NAU2957        | 5.33 | 5.92   | 0.55  | 4         |        |                                                                                                |
|           | CCRI36             | 11XJS | 5   | 141.28   | NAU2957        | 4.45 | 4.91   | 0.50  | 4         |        |                                                                                                |
|           | CCRI36             | 14XJN | 5   | 141.28   | NAU2957        | 2.58 | 2.89   | 0.44  | 4         |        |                                                                                                |
| qFL-C6-3  | CCRI36             | 11HNA | 6   | 54.15    | 1-CML0180      | 8.18 | 8.77   | 0.43  | 4         |        |                                                                                                |
|           | CCRI36             | 11LNL | 6   | 54.15    | 1-CML0180      | 7.11 | 7.70   | 0.39  | 4         |        |                                                                                                |
|           | CCRI36             | 11XJS | 6   | 54.15    | 1-CML0180      | 3.38 | 3.73   | 0.27  | 4         |        |                                                                                                |
|           | CCRI36             | 14XJS | 6   | 54.15    | 1-CML0180      | 3.34 | 3.68   | 0.28  | 4         |        |                                                                                                |
| qFL-C7-1  | CCRI36             | 11LNL | 7   | 38.10    | HAU1367        | 3.06 | 3.36   | 0.39  | 1         |        |                                                                                                |
| qFL-C7-3  | CCRI36             | 10HNA | 7   | 92.24    | NAU1085        | 3.62 | 3.98   | 1.13  | 6         | BI-QTL | Sun et al., 2012; Song et al., 2017; Li et al., 2019b; Jamshed et al., 2016; Deng et al., 2019 |
|           | CCRI36             | 11HNA | 7   | 92.24    | NAU1085        | 3.93 | 4.32   | 1.01  | 6         |        |                                                                                                |
|           | CCRI36             | 11LNL | 7   | 92.24    | NAU1085        | 3.07 | 3.39   | 0.87  | 7         |        |                                                                                                |
|           | CCRI36             | 11XJS | 7   | 92.24    | NAU1085        | 2.63 | 2.91   | 0.80  | 7         |        |                                                                                                |
|           | CCRI36             | 14XJN | 7   | 92.24    | NAU1085        | 2.84 | 3.14   | 0.97  | 8         |        |                                                                                                |
|           | CCRI36             | 14XJS | 7   | 92.24    | NAU1085        | 2.97 | 3.27   | 0.89  | 8         |        |                                                                                                |
| qFL-C11-1 | CCRI36             | 11HNA | 11  | 252.99   | DPL0209        | 5.52 | 6.11   | 0.36  | 3         |        |                                                                                                |
|           | CCRI36             | 11LNL | 11  | 252.99   | DPL0209        | 4.82 | 5.23   | 0.33  | 3         |        |                                                                                                |
|           | CCRI36             | 11XJS | 11  | 252.99   | DPL0209        | 3.80 | 4.15   | 0.29  | 3         |        |                                                                                                |
| qFL-C14-6 | CCRI36             | 11HNA | 14  | 191.24   | NAU3820        | 3.06 | 3.38   | 0.35  | 3         |        |                                                                                                |
|           | CCRI36             | 11LNL | 14  | 191.24   | NAU3820        | 4.08 | 4.48   | 0.39  | 3         |        |                                                                                                |
|           | CCRI36             | 11XJS | 14  | 191.24   | NAU3820        | 3.10 | 3.41   | 0.34  | 3         |        |                                                                                                |
| qFL-C15-1 | CCRI36             | 10HNA | 15  | 43.61    | NAU3177        | 3.29 | 3.71   | 0.33  | 5         | BI-QTL |                                                                                                |
|           | CCRI36             | 11HNA | 15  | 43.61    | NAU3177        | 4.26 | 5.36   | 0.42  | 5         |        |                                                                                                |
|           | CCRI36             | 11LNL | 15  | 43.61    | NAU3177        | 4.00 | 4.89   | 0.46  | 5         |        |                                                                                                |
|           | CCRI36             | 11XJS | 15  | 43.61    | NAU3177        | 4.43 | 5.18   | 0.41  | 5         |        |                                                                                                |

|           |        |       |    |        |            |       |       |       |   |        |                                                        |
|-----------|--------|-------|----|--------|------------|-------|-------|-------|---|--------|--------------------------------------------------------|
|           | CCRI36 | 14XJS | 15 | 43.61  | NAU3177    | 6.22  | 7.11  | 0.46  | 5 |        |                                                        |
| qFL-C15-3 | CCRI36 | 14XJN | 15 | 174.48 | JESPR152   | 3.40  | 3.77  | 0.64  | 2 |        |                                                        |
|           | CCRI36 | 14XJS | 15 | 174.48 | JESPR152   | 2.78  | 3.11  | 0.64  | 2 |        |                                                        |
| qFL-C16-1 | CCRI36 | 11XJS | 16 | 29.18  | HAU0120    | 3.16  | 3.50  | 0.51  | 1 |        |                                                        |
| qFL-C16-2 | CCRI36 | 14XJN | 16 | 65.97  | BNL2634    | 3.39  | 3.86  | 0.94  | 1 | BI-QTL | Shen et al., 2005; Li et al., 2019b                    |
| qFL-C16-3 | CCRI36 | 10HNA | 16 | 176.71 | BNL3065    | 3.10  | 3.50  | -0.63 | 3 |        | Shi et al., 2019                                       |
|           | CCRI36 | 11HNA | 16 | 176.71 | BNL3065    | 2.75  | 3.10  | -0.70 | 3 |        |                                                        |
|           | CCRI36 | 11LNL | 16 | 176.71 | BNL3065    | 3.05  | 3.44  | -0.64 | 3 |        |                                                        |
| qFL-C17-1 | CCRI36 | 14XJN | 17 | 0.00   | CICR0447   | 3.74  | 4.19  | 1.26  | 2 |        |                                                        |
|           | CCRI36 | 14XJS | 17 | 0.00   | CICR0447   | 3.05  | 3.52  | 1.05  | 2 |        |                                                        |
| qFL-C17-5 | CCRI36 | 11HNA | 17 | 122.79 | HAU0195a   | 3.08  | 3.42  | 0.36  | 4 |        |                                                        |
|           | CCRI36 | 11LNL | 17 | 122.79 | HAU0195a   | 3.84  | 4.36  | 0.43  | 4 |        |                                                        |
|           | CCRI36 | 11XJS | 17 | 122.79 | HAU0195a   | 6.91  | 7.72  | 0.56  | 4 |        |                                                        |
|           | CCRI36 | 14XJS | 17 | 122.79 | HAU0195a   | 6.54  | 7.31  | 0.53  | 4 |        |                                                        |
| qFL-C19-5 | CCRI36 | 11HNA | 19 | 196.95 | NAU2274    | 3.67  | 3.87  | 0.31  | 4 |        | Shao et al., 2014; Wang et al., 2017a                  |
|           | CCRI36 | 11LNL | 19 | 196.95 | NAU2274    | 6.40  | 6.77  | 0.40  | 4 |        |                                                        |
|           | CCRI36 | 11XJS | 19 | 196.95 | NAU2274    | 4.47  | 4.86  | 0.33  | 4 |        |                                                        |
|           | CCRI36 | 14XJS | 19 | 196.95 | NAU2274    | 5.92  | 6.28  | 0.39  | 4 |        |                                                        |
| qFL-C20-1 | CCRI36 | 11HNA | 20 | 12.33  | CGR5565a   | 7.66  | 8.25  | 0.44  | 4 |        | Zhai et al., 2010; Shi et al., 2019; Deng et al., 2019 |
|           | CCRI36 | 11LNL | 20 | 12.33  | CGR5565a   | 3.31  | 3.65  | 0.30  | 4 |        |                                                        |
|           | CCRI36 | 11XJS | 20 | 12.33  | CGR5565a   | 4.94  | 5.39  | 0.35  | 4 |        |                                                        |
|           | CCRI36 | 14XJS | 20 | 12.33  | CGR5565a   | 7.85  | 8.43  | 0.45  | 4 |        |                                                        |
| qFL-C20-4 | CCRI36 | 10HNA | 20 | 175.52 | NAU3665    | 6.57  | 7.16  | 0.36  | 5 |        | Zhang et al., 2012; Song et al., 2017                  |
|           | CCRI36 | 11HNA | 20 | 175.52 | NAU3665    | 6.18  | 6.97  | 0.38  | 5 |        |                                                        |
|           | CCRI36 | 11LNL | 20 | 175.52 | NAU3665    | 3.48  | 3.97  | 0.33  | 5 |        |                                                        |
|           | CCRI36 | 11XJS | 20 | 175.52 | NAU3665    | 10.58 | 11.49 | 0.47  | 5 |        |                                                        |
|           | CCRI36 | 14XJS | 20 | 175.52 | NAU3665    | 9.07  | 10.15 | 0.45  | 5 |        |                                                        |
| qFL-C21-3 | CCRI36 | 14XJN | 21 | 213.88 | PGML03706a | 2.79  | 3.12  | 0.73  | 1 |        | Zhang et al., 2016                                     |
| qFL-C22-1 | CCRI36 | 11HNA | 22 | 21.84  | NAU2026    | 3.51  | 3.91  | 0.33  | 2 |        | Song et al., 2017                                      |
|           | CCRI36 | 11LNL | 22 | 21.84  | NAU2026    | 3.60  | 4.03  | 0.34  | 2 |        |                                                        |
| qFL-C23-2 | CCRI36 | 11LNL | 23 | 31.42  | PGML0473b  | 3.62  | 3.98  | 0.48  | 1 |        |                                                        |
| qFL-C23-3 | CCRI36 | 11HNA | 23 | 208.14 | NAU5189    | 4.87  | 5.41  | 0.35  | 4 |        |                                                        |
|           | CCRI36 | 11LNL | 23 | 208.14 | NAU5189    | 3.05  | 3.40  | 0.29  | 4 |        |                                                        |
|           | CCRI36 | 11XJS | 23 | 208.14 | NAU5189    | 7.37  | 8.10  | 0.43  | 4 |        |                                                        |
|           | CCRI36 | 14XJS | 23 | 208.14 | NAU5189    | 10.05 | 10.83 | 0.51  | 4 |        |                                                        |
| qFL-C24-1 | CCRI36 | 10HNA | 24 | 153.52 | NAU3158    | 3.40  | 3.71  | -0.97 | 1 |        |                                                        |
| qFL-C26-1 | CCRI36 | 14XJN | 26 | 82.84  | NAU2442    | 3.27  | 3.63  | 0.93  | 1 |        |                                                        |
| qFM-C1-1  | CCRI36 | 10HNA | 1  | 4.84   | HAU1619    | 2.61  | 2.91  | 0.12  | 3 |        | Shao et al., 2014                                      |
|           | CCRI36 | 11LNL | 1  | 4.84   | HAU1619    | 3.91  | 4.31  | 0.11  | 3 |        |                                                        |
|           | CCRI36 | 11XJS | 1  | 4.84   | HAU1619    | 2.88  | 3.19  | 0.11  | 3 |        |                                                        |
| qFM-C1-2  | CCRI36 | 11XJS | 1  | 27.95  | NAU4074    | 2.85  | 3.15  | -0.16 | 1 |        | Shi et al., 2019                                       |
| qFM-C3-1  | CCRI36 | 14XJS | 3  | 105.29 | HAU1022    | 7.12  | 6.99  | -0.15 | 6 |        | zhai et al., 2016                                      |
|           | CCRI36 | 11HNA | 3  | 105.29 | HAU1022    | 9.82  | 9.94  | -0.22 | 6 |        |                                                        |
|           | CCRI36 | 11LNL | 3  | 105.29 | HAU1022    | 8.79  | 9.98  | -0.22 | 6 |        |                                                        |
|           | CCRI36 | 11XJS | 3  | 105.29 | HAU1022    | 9.81  | 10.82 | -0.19 | 6 |        |                                                        |
|           | CCRI36 | 10HNA | 3  | 105.29 | HAU1022    | 10.17 | 10.82 | -0.22 | 6 |        |                                                        |
|           | CCRI36 | 14XJN | 3  | 105.29 | HAU1022    | 10.21 | 11.90 | -0.18 | 6 |        |                                                        |
| qFM-C3-2  | CCRI36 | 11HNA | 3  | 114.40 | HAU0195b   | 2.76  | 3.05  | -0.08 | 1 |        | Ma et al., 2017                                        |
| qFM-C4-2  | CCRI36 | 11LNL | 4  | 73.91  | Gh117      | 2.73  | 3.03  | 0.15  | 1 |        |                                                        |
| qFM-C7-3  | CCRI36 | 11LNL | 7  | 92.24  | NAU1085    | 3.41  | 3.76  | -0.25 | 2 |        | Sun et al., 2012                                       |
|           | CCRI36 | 11LNL | 7  | 92.24  | NAU1085    | 3.41  | 3.76  | -0.25 | 2 |        |                                                        |
| qFM-C12-1 | CCRI36 | 10HNA | 12 | 114.96 | HAU1454    | 5.06  | 5.52  | -0.10 | 2 |        | Yang et al., 2015                                      |
|           | CCRI36 | 11LNL | 12 | 114.96 | HAU1454    | 4.17  | 4.58  | -0.07 | 2 |        |                                                        |
| qFM-C14-1 | CCRI36 | 10HNA | 14 | 104.33 | BNL3145    | 6.63  | 7.18  | -0.21 | 6 |        | said et al., 2015b                                     |
|           | CCRI36 | 11HNA | 14 | 104.33 | BNL3145    | 6.71  | 7.25  | -0.24 | 6 |        |                                                        |

|           |        |       |    |        |          |       |       |       |   |        |                                                                             |
|-----------|--------|-------|----|--------|----------|-------|-------|-------|---|--------|-----------------------------------------------------------------------------|
|           | CCRI36 | 11LNL | 14 | 104.33 | BNL3145  | 13.33 | 13.91 | -0.26 | 6 |        |                                                                             |
|           | CCRI36 | 11XJS | 14 | 104.33 | BNL3145  | 4.38  | 4.80  | -0.15 | 6 |        |                                                                             |
|           | CCRI36 | 14XJN | 14 | 104.33 | BNL3145  | 7.64  | 8.22  | -0.24 | 6 |        |                                                                             |
|           | CCRI36 | 14XJS | 14 | 104.33 | BNL3145  | 7.52  | 8.09  | -0.26 | 6 |        |                                                                             |
| qFM-C10-1 | CCRI36 | 10HNA | 16 | 79.08  | NAU5408  | 2.52  | 2.77  | -0.14 | 2 |        | Li et al., 2019b                                                            |
|           | CCRI36 | 11XJS | 16 | 79.08  | NAU5408  | 3.19  | 3.47  | -0.18 | 2 |        |                                                                             |
| qFM-C17-1 | CCRI36 | 11LNL | 17 | 0.00   | CICR0447 | 3.43  | 3.76  | 0.12  | 1 |        |                                                                             |
| qFM-C17-2 | CCRI36 | 10HNA | 17 | 47.26  | NAU2909  | 8.97  | 9.59  | -0.18 | 6 | BI-QTL | Zhai et al., 2016                                                           |
|           | CCRI36 | 11HNA | 17 | 47.26  | NAU2909  | 6.50  | 7.04  | -0.17 | 6 |        |                                                                             |
|           | CCRI36 | 11LNL | 17 | 47.26  | NAU2909  | 9.05  | 9.67  | -0.20 | 6 |        |                                                                             |
|           | CCRI36 | 11XJS | 17 | 47.26  | NAU2909  | 6.46  | 6.99  | -0.18 | 6 |        |                                                                             |
|           | CCRI36 | 14XJN | 17 | 47.26  | NAU2909  | 8.94  | 9.55  | -0.16 | 6 |        |                                                                             |
|           | CCRI36 | 14XJS | 17 | 47.26  | NAU2909  | 4.52  | 4.95  | -0.12 | 6 |        |                                                                             |
| qFM-C17-2 | CCRI36 | 10HNA | 17 | 93.28  | HAU0764  | 10.51 | 11.14 | -0.20 | 6 |        |                                                                             |
|           | CCRI36 | 11HNA | 17 | 93.28  | HAU0764  | 10.92 | 11.54 | -0.23 | 6 |        |                                                                             |
|           | CCRI36 | 11LNL | 17 | 93.28  | HAU0764  | 7.26  | 7.83  | -0.15 | 6 |        |                                                                             |
|           | CCRI36 | 11XJS | 17 | 93.28  | HAU0764  | 11.54 | 12.15 | -0.23 | 6 |        |                                                                             |
|           | CCRI36 | 14XJN | 17 | 93.28  | HAU0764  | 10.80 | 11.42 | -0.24 | 6 |        |                                                                             |
|           | CCRI36 | 14XJS | 17 | 93.28  | HAU0764  | 11.12 | 11.74 | -0.19 | 6 |        |                                                                             |
| qFM-C17-4 | CCRI36 | 10HNA | 17 | 122.79 | HAU0195a | 5.48  | 6.10  | -0.22 | 6 |        | Wang et al., 2016                                                           |
|           | CCRI36 | 11HNA | 17 | 122.79 | HAU0195a | 3.80  | 4.32  | -0.21 | 6 |        |                                                                             |
|           | CCRI36 | 11LNL | 17 | 122.79 | HAU0195a | 4.82  | 5.27  | -0.24 | 6 |        |                                                                             |
|           | CCRI36 | 11XJS | 17 | 122.79 | HAU0195a | 5.50  | 6.11  | -0.24 | 6 |        |                                                                             |
|           | CCRI36 | 14XJN | 17 | 122.79 | HAU0195a | 7.30  | 8.08  | -0.23 | 6 |        |                                                                             |
|           | CCRI36 | 14XJS | 17 | 122.79 | HAU0195a | 3.57  | 4.11  | -0.16 | 6 |        |                                                                             |
| qFM-C17-5 | CCRI36 | 10HNA | 19 | 0.00   | CICR0851 | 2.58  | 2.86  | -0.41 | 2 |        |                                                                             |
|           | CCRI36 | 14XJN | 19 | 0.00   | CICR0851 | 2.56  | 2.83  | -0.39 | 2 |        |                                                                             |
| qFM-C17-6 | CCRI36 | 14XJN | 19 | 145.90 | NAU5475  | 2.70  | 3.02  | -0.16 | 1 |        |                                                                             |
| qFM-C17-7 | CCRI36 | 10HNA | 19 | 237.78 | Gh447    | 3.60  | 4.00  | -0.23 | 5 |        |                                                                             |
|           | CCRI36 | 11HNA | 19 | 237.78 | Gh447    | 2.63  | 2.93  | -0.19 | 5 |        |                                                                             |
|           | CCRI36 | 11XJS | 19 | 237.78 | Gh447    | 4.65  | 5.12  | -0.20 | 5 |        |                                                                             |
|           | CCRI36 | 14XJN | 19 | 237.78 | Gh447    | 3.33  | 3.69  | -0.20 | 5 |        |                                                                             |
|           | CCRI36 | 14XJS | 19 | 237.78 | Gh447    | 3.86  | 4.28  | -0.20 | 5 |        |                                                                             |
| qFM-C20-1 | CCRI36 | 14XJS | 20 | 200.39 | DPL0442  | 2.99  | 3.30  | 0.22  | 1 |        | Fang et al., 2014                                                           |
| qFM-C23-1 | CCRI36 | 11HNA | 23 | 70.02  | JESPR151 | 3.46  | 3.84  | -0.51 | 1 |        |                                                                             |
| qFM-C23-2 | CCRI36 | 14XJN | 25 | 43.23  | CGR5100  | 3.73  | 4.28  | -0.24 | 1 |        |                                                                             |
| qFM-C23-3 | CCRI36 | 10HNA | 25 | 79.16  | HAU1783  | 3.08  | 3.36  | -0.26 | 2 |        | Li et al., 2019b                                                            |
|           | CCRI36 | 11HNA | 25 | 79.16  | HAU1783  | 3.35  | 3.52  | -0.20 | 2 |        |                                                                             |
| qFM-C23-4 | CCRI36 | 10HNA | 25 | 94.57  | CER0086b | 4.16  | 4.60  | -0.15 | 5 |        |                                                                             |
|           | CCRI36 | 11HNA | 25 | 94.57  | CER0086b | 3.30  | 3.67  | -0.17 | 5 |        |                                                                             |
|           | CCRI36 | 11XJS | 25 | 94.57  | CER0086b | 2.71  | 2.99  | -0.13 | 5 |        |                                                                             |
|           | CCRI36 | 14XJN | 25 | 94.57  | CER0086b | 2.69  | 2.99  | -0.15 | 5 |        |                                                                             |
|           | CCRI36 | 14XJS | 25 | 94.57  | CER0086b | 3.43  | 3.82  | -0.18 | 5 |        |                                                                             |
| qFS-C2-2  | CCRI36 | 14XJS | 2  | 154.42 | HAU1475  | 2.56  | 2.83  | 0.62  | 1 |        |                                                                             |
| qFS-C3-1  | CCRI36 | 14XJN | 3  | 93.70  | MUSB0087 | 2.59  | 2.87  | 0.82  | 1 |        |                                                                             |
| qFS-C3-2  | CCRI36 | 11HNA | 3  | 114.40 | HAU0195b | 4.29  | 4.70  | 0.46  | 1 |        |                                                                             |
| qFS-C5-1  | CCRI36 | 11HNA | 5  | 89.92  | MUSS317  | 2.63  | 2.93  | 0.48  | 1 |        |                                                                             |
| qFS-C7-4  | CCRI36 | 10HNA | 7  | 92.24  | NAU1085  | 3.27  | 3.60  | 1.29  | 4 | BI-QTL | Sun et al., 2012; Song et al., 2017; Li et al., 2019b; Jamshed et al., 2016 |
|           | CCRI36 | 11HNA | 7  | 92.24  | NAU1085  | 3.16  | 3.49  | 1.13  | 4 |        |                                                                             |
|           | CCRI36 | 11LNL | 7  | 92.24  | NAU1085  | 2.95  | 3.26  | 0.96  | 4 |        |                                                                             |
|           | CCRI36 | 11XJS | 7  | 92.24  | NAU1085  | 2.88  | 3.19  | 0.95  | 4 |        |                                                                             |
| qFS-C11-1 | CCRI36 | 11LNL | 11 | 86.66  | CGR6697b | 2.80  | 3.10  | 0.39  | 1 |        | wang et al., 2017b, Zhai et al., 2016; Shi et al., 2019                     |
| qFS-C11-2 | CCRI36 | 11LNL | 11 | 90.27  | HAU0848  | 2.94  | 3.32  | 0.61  | 1 |        |                                                                             |
| qFS-C11-4 | CCRI36 | 09HNA | 11 | 126.68 | NAU3234  | 10.19 | 10.81 | -7.76 | 1 |        |                                                                             |

|           |        |       |    |        |            |       |       |       |   |        |                                                        |
|-----------|--------|-------|----|--------|------------|-------|-------|-------|---|--------|--------------------------------------------------------|
| qFS-C11-7 | CCRI36 | 11HNA | 11 | 252.99 | DPL0209    | 3.90  | 4.36  | 0.38  | 1 |        |                                                        |
| qFS-C13-3 | CCRI36 | 11LNL | 13 | 184.33 | NAU3468    | 2.61  | 2.89  | 0.64  | 1 |        | Shi et al., 2019                                       |
| qFS-C15-3 | CCRI36 | 14XJS | 15 | 43.61  | NAU3177    | 2.51  | 3.17  | 0.44  | 1 | BI-QTL | Li et al., 2019b                                       |
| qFS-C15-5 | CCRI36 | 14XJS | 15 | 174.48 | JESPR152   | 2.54  | 2.83  | 0.77  | 1 |        | Guo et al., 2018                                       |
| qFS-C16-2 | CCRI36 | 11HNA | 16 | 29.18  | HAU0120    | 2.92  | 3.24  | 0.63  | 2 |        |                                                        |
|           | CCRI36 | 11XJS | 16 | 29.18  | HAU0120    | 4.00  | 4.42  | 0.65  | 2 |        |                                                        |
| qFS-C16-3 | CCRI36 | 11HNA | 16 | 65.97  | BNL2634    | 4.05  | 4.67  | 1.14  | 2 | BI-QTL | Shen et al., 2005; Li et al., 2019b                    |
|           | CCRI36 | 11LNL | 16 | 65.97  | BNL2634    | 4.03  | 4.61  | 1.00  | 2 |        |                                                        |
| qFS-C16-4 | CCRI36 | 10HNA | 16 | 176.71 | BNL3065    | 3.81  | 4.21  | -0.99 | 4 |        | Shi et al., 2019                                       |
|           | CCRI36 | 11HNA | 16 | 176.71 | BNL3065    | 3.02  | 3.39  | -0.69 | 4 |        |                                                        |
|           | CCRI36 | 11LNL | 16 | 176.71 | BNL3065    | 3.32  | 3.73  | -0.82 | 4 |        |                                                        |
|           | CCRI36 | 11XJS | 16 | 176.71 | BNL3065    | 3.28  | 3.69  | -0.72 | 4 |        |                                                        |
| qFS-C17-3 | CCRI36 | 11HNA | 17 | 122.79 | HAU0195a   | 2.68  | 3.03  | 0.44  | 2 | BI-QTL | Li et al., 2019b                                       |
|           | CCRI36 | 11LNL | 17 | 122.79 | HAU0195a   | 2.57  | 2.91  | 0.38  | 2 |        |                                                        |
| qFS-C20-1 | CCRI36 | 11HNA | 20 | 12.33  | CGR5565a   | 3.78  | 4.16  | 0.40  | 1 |        | Zhai et al., 2016; Shi et al., 2019; Deng et al., 2019 |
| qFS-C20-2 | CCRI36 | 11HNA | 20 | 96.25  | Gh119      | 2.51  | 2.81  | 0.72  | 1 |        | Song et al., 2017                                      |
| qFS-C20-4 | CCRI36 | 11HNA | 20 | 152.59 | NAU3813b   | 2.74  | 3.05  | 0.59  | 1 |        | Song et al., 2017                                      |
| qFS-C20-5 | CCRI36 | 10HNA | 20 | 162.96 | TMB1125    | 3.44  | 3.79  | 0.67  | 2 |        | Song et al., 2017                                      |
|           | CCRI36 | 11LNL | 20 | 162.96 | TMB1125    | 3.35  | 3.70  | 0.52  | 2 |        |                                                        |
| qFS-C20-6 | CCRI36 | 11HNA | 20 | 175.52 | NAU3665    | 3.66  | 4.06  | 0.35  | 1 |        |                                                        |
| qFS-C21-3 | CCRI36 | 14XJS | 21 | 213.88 | PGML03706a | 2.68  | 3.00  | 0.89  | 1 |        |                                                        |
| qFS-C23-2 | CCRI36 | 11HNA | 23 | 208.14 | NAU5189    | 3.17  | 3.57  | 0.36  | 1 |        |                                                        |
| qFS-C25-3 | CCRI36 | 14XJS | 25 | 37.14  | BNL1440a   | 2.54  | 2.81  | 0.87  | 1 |        | Sun et al., 2012; Jamshed et al., 2016                 |
| qFS-C26-3 | CCRI36 | 14XJS | 26 | 82.84  | NAU2442    | 2.63  | 2.91  | 1.04  | 1 |        |                                                        |
| qFS-C26-4 | CCRI36 | 09HNA | 26 | 233.99 | CGR5152    | 7.13  | 7.70  | -5.94 | 1 |        |                                                        |
| qFL-C1-2  | CCRI45 | 14HNZ | 1  | 154.73 | NAU2095    | 2.74  | 3.71  | -0.53 | 2 |        |                                                        |
|           | CCRI45 | 15HNA | 1  | 154.73 | NAU2095    | 2.53  | 3.43  | -0.66 | 2 |        |                                                        |
| qFL-C2-1  | CCRI45 | 10HNA | 2  | 15.12  | BNL1434    | 11.98 | 15.51 | 1.37  | 8 |        | Fang et al., 2014; Said et al., 2015b                  |
|           | CCRI45 | 11XJA | 2  | 15.12  | BNL1434    | 12.49 | 16.31 | 1.38  | 8 |        |                                                        |
|           | CCRI45 | 11HNA | 2  | 15.12  | BNL1434    | 5.92  | 8.11  | 1.03  | 8 |        |                                                        |
|           | CCRI45 | 14XJA | 2  | 15.12  | BNL1434    | 3.44  | 4.80  | 0.61  | 8 |        |                                                        |
|           | CCRI45 | 14XJK | 2  | 15.12  | BNL1434    | 3.28  | 4.58  | 0.76  | 8 |        |                                                        |
|           | CCRI45 | 14HNZ | 2  | 15.12  | BNL1434    | 7.54  | 10.05 | 0.93  | 8 |        |                                                        |
|           | CCRI45 | 15HNA | 2  | 15.12  | BNL1434    | 4.70  | 6.39  | 0.96  | 8 |        |                                                        |
|           | CCRI45 | 15HNZ | 2  | 15.12  | BNL1434    | 7.63  | 9.91  | 0.91  | 8 |        |                                                        |
| qFL-C2-3  | CCRI45 | 10HNA | 2  | 54.78  | HAU1980b   | 10.65 | 13.68 | 1.34  | 8 |        | Zhai et al., 2016                                      |
|           | CCRI45 | 11XJA | 2  | 54.78  | HAU1980b   | 11.96 | 15.33 | 1.40  | 8 |        |                                                        |
|           | CCRI45 | 11HNA | 2  | 54.78  | HAU1980b   | 7.11  | 9.67  | 1.17  | 8 |        |                                                        |
|           | CCRI45 | 14XJA | 2  | 54.78  | HAU1980b   | 4.50  | 6.21  | 0.72  | 8 |        |                                                        |
|           | CCRI45 | 14XJK | 2  | 54.78  | HAU1980b   | 3.43  | 4.80  | 0.81  | 8 |        |                                                        |
|           | CCRI45 | 14HNZ | 2  | 54.78  | HAU1980b   | 8.60  | 11.40 | 1.03  | 8 |        |                                                        |
|           | CCRI45 | 15HNA | 2  | 54.78  | HAU1980b   | 6.42  | 8.66  | 1.16  | 8 |        |                                                        |
|           | CCRI45 | 15HNZ | 2  | 54.78  | HAU1980b   | 7.53  | 9.81  | 0.95  | 8 |        |                                                        |
| qFL-C2-5  | CCRI45 | 09HNA | 2  | 159.08 | TMB1580    | 2.85  | 3.87  | 0.62  | 6 |        |                                                        |
|           | CCRI45 | 10HNA | 2  | 159.08 | TMB1580    | 4.43  | 5.94  | 0.69  | 6 |        |                                                        |
|           | CCRI45 | 11XJA | 2  | 159.08 | TMB1580    | 4.30  | 5.79  | 0.67  | 6 |        |                                                        |
|           | CCRI45 | 11HNA | 2  | 159.08 | TMB1580    | 9.85  | 12.73 | 1.05  | 6 |        |                                                        |
|           | CCRI45 | 14XJK | 2  | 159.08 | TMB1580    | 3.28  | 4.44  | 0.61  | 6 |        |                                                        |

|           |        |       |    |        |          |       |       |       |   |        |                                                                                                |
|-----------|--------|-------|----|--------|----------|-------|-------|-------|---|--------|------------------------------------------------------------------------------------------------|
|           | CCRI45 | 15HNA | 2  | 159.08 | TMB1580  | 3.46  | 4.66  | 0.66  | 6 |        |                                                                                                |
| qFL-C2-6  | CCRI45 | 10HNA | 2  | 178.82 | NAU2277  | 4.42  | 5.92  | 0.71  | 4 | BI-QTL |                                                                                                |
|           | CCRI45 | 11XJA | 2  | 178.82 | NAU2277  | 4.56  | 6.13  | 0.71  | 4 |        |                                                                                                |
|           | CCRI45 | 11HNA | 2  | 178.82 | NAU2277  | 2.56  | 3.48  | 0.56  | 4 |        |                                                                                                |
|           | CCRI45 | 14HNZ | 2  | 178.82 | NAU2277  | 3.19  | 4.32  | 0.51  | 4 |        |                                                                                                |
| qFL-C5-3  | CCRI45 | 11HNA | 5  | 172.74 | NAU2296b | 2.91  | 4.32  | -1.24 | 1 |        |                                                                                                |
| qFL-C6-1  | CCRI45 | 10HNA | 6  | 29.82  | Gh082    | 3.59  | 3.91  | 0.45  | 1 |        |                                                                                                |
| qFL-C6-2  | CCRI45 | 14XJK | 6  | 31.00  | BNL1440b | 5.78  | 7.68  | -0.92 | 1 |        |                                                                                                |
| qFL-C7-2  | CCRI45 | 11XJA | 7  | 53.19  | CCRI45   | 4.27  | 5.75  | 0.62  | 3 |        |                                                                                                |
|           | CCRI45 | 11HNA | 7  | 53.19  | CCRI45   | 6.81  | 8.99  | 0.82  | 3 |        |                                                                                                |
|           | CCRI45 | 14XJK | 7  | 53.19  | CCRI45   | 2.98  | 4.03  | 0.54  | 3 |        |                                                                                                |
| qFL-C7-3  | CCRI45 | 10HNA | 7  | 92.24  | NAU1085  | 10.65 | 13.64 | 1.34  | 5 | BI-QTL | Sun et al., 2012; Song et al., 2017; Li et al., 2019b; Jamshed et al., 2016; Deng et al., 2019 |
|           | CCRI45 | 11HNA | 7  | 92.24  | NAU1085  | 7.11  | 9.64  | 1.17  | 5 |        |                                                                                                |
|           | CCRI45 | 14XJA | 7  | 92.24  | NAU1085  | 4.50  | 6.19  | 0.72  | 5 |        |                                                                                                |
|           | CCRI45 | 14XJK | 7  | 92.24  | NAU1085  | 3.43  | 4.78  | 0.81  | 5 |        |                                                                                                |
|           | CCRI45 | 14HNZ | 7  | 92.24  | NAU1085  | 8.60  | 11.38 | 1.03  | 5 |        |                                                                                                |
| qFL-C10-1 | CCRI45 | 11XJA | 10 | 91.66  | DPL0468  | 2.70  | 3.12  | 0.40  | 1 |        | Li et al., 2019b                                                                               |
| qFL-C10-2 | CCRI45 | 11XJA | 10 | 178.11 | BNL3563  | 5.48  | 7.32  | 0.75  | 3 |        | Shi et al., 2019                                                                               |
|           | CCRI45 | 11HNA | 10 | 178.11 | BNL3563  | 7.96  | 10.42 | 0.95  | 3 |        |                                                                                                |
|           | CCRI45 | 14XJK | 10 | 178.11 | BNL3563  | 3.02  | 4.09  | 0.58  | 3 |        |                                                                                                |
| qFL-C12-1 | CCRI45 | 10HNA | 12 | 16.72  | NAU3862  | 4.67  | 6.25  | 0.77  | 4 |        |                                                                                                |
|           | CCRI45 | 11XJA | 12 | 16.72  | NAU3862  | 5.92  | 7.88  | 0.85  | 4 |        |                                                                                                |
|           | CCRI45 | 14HNZ | 12 | 16.72  | NAU3862  | 2.68  | 3.63  | 0.49  | 4 |        |                                                                                                |
|           | CCRI45 | 15HNZ | 12 | 16.72  | NAU3862  | 3.87  | 5.19  | 0.58  | 4 |        |                                                                                                |
| qFL-C12-2 | CCRI45 | 11XJA | 12 | 72.93  | NAU5139  | 3.78  | 3.59  | 0.42  | 1 |        |                                                                                                |
| qFL-C12-3 | CCRI45 | 11XJA | 12 | 84.57  | HAU1361  | 3.23  | 4.40  | 0.57  | 2 |        |                                                                                                |
|           | CCRI45 | 15HNZ | 12 | 84.57  | HAU1361  | 3.17  | 4.28  | 0.31  | 2 |        |                                                                                                |
| qFL-C12-4 | CCRI45 | 09HNA | 12 | 110.86 | NAU4889  | 12.12 | 15.42 | 1.29  | 7 |        |                                                                                                |
|           | CCRI45 | 10HNA | 12 | 110.86 | NAU4889  | 3.57  | 4.81  | 0.71  | 7 |        |                                                                                                |
|           | CCRI45 | 11XJA | 12 | 110.86 | NAU4889  | 5.99  | 7.95  | 0.89  | 7 |        |                                                                                                |
|           | CCRI45 | 11HNA | 12 | 110.86 | NAU4889  | 3.41  | 4.61  | 0.57  | 7 |        |                                                                                                |
|           | CCRI45 | 14XJK | 12 | 110.86 | NAU4889  | 3.17  | 4.28  | 0.55  | 7 |        |                                                                                                |
|           | CCRI45 | 14HNZ | 12 | 110.86 | NAU4889  | 5.54  | 7.40  | 0.85  | 7 |        |                                                                                                |
|           | CCRI45 | 15HNZ | 12 | 110.86 | NAU4889  | 3.61  | 4.87  | 0.78  | 7 |        |                                                                                                |
| qFL-C12-5 | CCRI45 | 11XJA | 12 | 114.96 | HAU1454  | 2.74  | 4.17  | 0.29  | 1 |        |                                                                                                |
| qFL-C13-1 | CCRI45 | 10HNA | 13 | 8.68   | BNL1707  | 3.07  | 4.17  | 0.60  | 2 |        |                                                                                                |
|           | CCRI45 | 11XJA | 13 | 8.68   | BNL1707  | 2.76  | 3.75  | 0.58  | 2 |        |                                                                                                |
| qFL-C13-2 | CCRI45 | 10HNA | 13 | 40.66  | NAU3948  | 2.54  | 3.44  | 0.52  | 4 |        |                                                                                                |
|           | CCRI45 | 11XJA | 13 | 40.66  | NAU3948  | 3.11  | 4.21  | 0.70  | 4 |        |                                                                                                |
|           | CCRI45 | 11HNA | 13 | 40.66  | NAU3948  | 2.93  | 3.98  | 0.66  | 4 |        |                                                                                                |
|           | CCRI45 | 15HNZ | 13 | 40.66  | NAU3948  | 6.05  | 8.03  | 1.00  | 4 |        |                                                                                                |
| qFL-C13-3 | CCRI45 | 10HNA | 13 | 164.25 | CGR5242  | 2.74  | 3.71  | 0.61  | 4 |        |                                                                                                |
|           | CCRI45 | 11XJA | 13 | 164.25 | CGR5242  | 3.26  | 4.40  | 0.68  | 4 |        |                                                                                                |
|           | CCRI45 | 11HNA | 13 | 164.25 | CGR5242  | 5.36  | 7.14  | 0.88  | 4 |        |                                                                                                |
|           | CCRI45 | 14XJK | 13 | 164.25 | CGR5242  | 4.37  | 5.88  | 0.75  | 4 |        |                                                                                                |
| qFL-C14-1 | CCRI45 | 11XJA | 14 | 40.73  | NAU3648  | 7.92  | 10.41 | 1.04  | 2 |        | Zhai et al., 2016                                                                              |
|           | CCRI45 | 14XJA | 14 | 40.73  | NAU3648  | 2.81  | 3.81  | 0.51  | 2 |        |                                                                                                |
| qFL-C14-2 | CCRI45 | 14XJK | 14 | 46.54  | NAU5421  | 2.68  | 3.64  | -0.83 | 1 |        | Zhai et al., 2016                                                                              |
| qFL-C14-3 | CCRI45 | 11HNA | 14 | 83.01  | BNL1059  | 3.83  | 5.16  | -0.91 | 1 |        | He et al., 2007; Liu et al., 2005                                                              |
| qFL-C14-4 | CCRI45 | 10HNA | 14 | 171.34 | NAU3225  | 3.99  | 5.37  | 0.45  | 3 |        |                                                                                                |
|           | CCRI45 | 11XJA | 14 | 171.34 | NAU3225  | 6.80  | 8.98  | 0.73  | 3 |        |                                                                                                |
|           | CCRI45 | 14XJA | 14 | 171.34 | NAU3225  | 5.44  | 7.26  | 0.65  | 3 |        |                                                                                                |
| qFL-C14-5 | CCRI45 | 10HNA | 14 | 181.56 | NAU3214  | 5.48  | 7.30  | 0.67  | 2 |        | Said et al., 2015b                                                                             |
|           | CCRI45 | 11XJA | 14 | 181.56 | NAU3214  | 3.41  | 4.62  | 0.53  | 2 |        |                                                                                                |
| qFL-C14-7 | CCRI45 | 11HNA | 14 | 206.88 | HAU1219a | 3.48  | 4.70  | -0.79 | 2 |        |                                                                                                |

|           |        |       |    |        |          |       |       |       |   |        |                                     |
|-----------|--------|-------|----|--------|----------|-------|-------|-------|---|--------|-------------------------------------|
|           | CCRI45 | 15HNZ | 14 | 206.88 | HAU1219a | 2.92  | 3.95  | -0.58 | 2 |        |                                     |
| qFL-C15-1 | CCRI45 | 09HNA | 15 | 43.61  | NAU3177  | 7.98  | 10.00 | 1.75  | 8 | BI-QTL |                                     |
|           | CCRI45 | 10HNA | 15 | 43.61  | NAU3177  | 2.98  | 4.08  | 1.10  | 8 |        |                                     |
|           | CCRI45 | 11XJA | 15 | 43.61  | NAU3177  | 4.09  | 5.44  | 1.05  | 8 |        |                                     |
|           | CCRI45 | 11HNA | 15 | 43.61  | NAU3177  | 2.93  | 4.04  | 1.20  | 8 |        |                                     |
|           | CCRI45 | 14XJK | 15 | 43.61  | NAU3177  | 3.52  | 4.81  | 1.27  | 8 |        |                                     |
|           | CCRI45 | 14HNZ | 15 | 43.61  | NAU3177  | 4.63  | 6.15  | 1.32  | 8 |        |                                     |
|           | CCRI45 | 15HNA | 15 | 43.61  | NAU3177  | 3.17  | 4.15  | 0.90  | 8 |        |                                     |
|           | CCRI45 | 15HNZ | 15 | 43.61  | NAU3177  | 6.39  | 8.41  | 1.52  | 8 |        |                                     |
| qFL-C15-2 | CCRI45 | 10HNA | 15 | 66.78  | HAU0670  | 3.25  | 4.38  | 0.33  | 4 |        |                                     |
|           | CCRI45 | 11XJA | 15 | 66.78  | HAU0670  | 5.41  | 7.21  | 0.52  | 4 |        |                                     |
|           | CCRI45 | 14XJA | 15 | 66.78  | HAU0670  | 3.90  | 5.27  | 0.43  | 4 |        |                                     |
|           | CCRI45 | 15HNZ | 15 | 66.78  | HAU0670  | 2.61  | 3.54  | 0.29  | 4 |        |                                     |
| qFL-C15-4 | CCRI45 | 11HNA | 15 | 177.43 | MUSS085  | 5.01  | 6.70  | -0.78 | 1 |        | Li et al., 2019b                    |
| qFL-C16-2 | CCRI45 | 09HNA | 16 | 65.97  | BNL2634  | 13.43 | 16.95 | 1.24  | 8 | BI-QTL | Shen et al., 2005; Li et al., 2019b |
|           | CCRI45 | 10HNA | 16 | 65.97  | BNL2634  | 4.96  | 6.63  | 0.76  | 8 |        |                                     |
|           | CCRI45 | 11XJA | 16 | 65.97  | BNL2634  | 4.25  | 5.71  | 0.78  | 8 |        |                                     |
|           | CCRI45 | 11HNA | 16 | 65.97  | BNL2634  | 4.36  | 5.86  | 0.59  | 8 |        |                                     |
|           | CCRI45 | 14XJK | 16 | 65.97  | BNL2634  | 4.47  | 5.98  | 0.77  | 8 |        |                                     |
|           | CCRI45 | 14HNZ | 16 | 65.97  | BNL2634  | 6.33  | 8.38  | 0.84  | 8 |        |                                     |
|           | CCRI45 | 15HNA | 16 | 65.97  | BNL2634  | 6.43  | 8.54  | 0.83  | 8 |        |                                     |
|           | CCRI45 | 15HNZ | 16 | 65.97  | BNL2634  | 3.93  | 5.27  | 0.56  | 8 |        |                                     |
| qFL-C17-2 | CCRI45 | 11XJA | 17 | 23.34  | HAU2014  | 4.76  | 6.39  | -0.76 | 1 |        |                                     |
| qFL-C17-3 | CCRI45 | 09HNA | 17 | 47.26  | NAU2909  | 10.78 | 13.85 | 1.18  | 7 |        |                                     |
|           | CCRI45 | 10HNA | 17 | 47.26  | NAU2909  | 2.78  | 3.77  | 0.61  | 7 |        |                                     |
|           | CCRI45 | 11XJA | 17 | 47.26  | NAU2909  | 2.56  | 3.48  | 0.64  | 7 |        |                                     |
|           | CCRI45 | 11HNA | 17 | 47.26  | NAU2909  | 5.22  | 6.96  | 0.81  | 7 |        |                                     |
|           | CCRI45 | 14XJK | 17 | 47.26  | NAU2909  | 2.65  | 3.60  | 0.49  | 7 |        |                                     |
|           | CCRI45 | 14HNZ | 17 | 47.26  | NAU2909  | 5.21  | 6.93  | 0.88  | 7 |        |                                     |
|           | CCRI45 | 15HNA | 17 | 47.26  | NAU2909  | 4.63  | 6.22  | 0.75  | 7 |        |                                     |
| qFL-C17-4 | CCRI45 | 11HNA | 17 | 56.36  | NAU2325  | 4.36  | 5.85  | -0.77 | 1 |        | Shen et al., 2005                   |
| qFL-C19-1 | CCRI45 | 11XJA | 19 | 17.39  | NAU3405  | 4.28  | 5.76  | 0.70  | 3 |        | Wang et al., 2017a                  |
|           | CCRI45 | 11HNA | 19 | 17.39  | NAU3405  | 7.37  | 9.70  | 0.96  | 3 |        |                                     |
|           | CCRI45 | 14XJK | 19 | 17.39  | NAU3405  | 2.51  | 3.41  | 0.56  | 3 |        |                                     |
| qFL-C19-2 | CCRI45 | 10HNA | 19 | 88.23  | DPL0444  | 3.89  | 5.23  | 0.66  | 4 |        | Wang et al., 2017a                  |
|           | CCRI45 | 11XJA | 19 | 88.23  | DPL0444  | 3.04  | 4.11  | 0.64  | 4 |        |                                     |
|           | CCRI45 | 11HNA | 19 | 88.23  | DPL0444  | 2.63  | 3.59  | 0.54  | 4 |        |                                     |
|           | CCRI45 | 15HNA | 19 | 88.23  | DPL0444  | 6.07  | 8.05  | 0.85  | 4 |        |                                     |
| qFL-C19-3 | CCRI45 | 14XJA | 19 | 99.97  | BNL1064  | 2.83  | 3.86  | 0.84  | 1 |        |                                     |
| qFL-C19-4 | CCRI45 | 11HNA | 19 | 161.66 | DPL0215  | 3.87  | 5.21  | -0.83 | 1 |        |                                     |
| qFL-C20-2 | CCRI45 | 09HNA | 20 | 113.72 | HAU1491b | 4.13  | 5.55  | 0.65  | 3 |        |                                     |
|           | CCRI45 | 11XJA | 20 | 113.72 | HAU1491b | 3.77  | 5.08  | 0.57  | 3 |        |                                     |
|           | CCRI45 | 11HNA | 20 | 113.72 | HAU1491b | 3.65  | 4.94  | 0.53  | 3 |        |                                     |
| qFL-C20-3 | CCRI45 | 11XJA | 20 | 139.90 | HAU1491a | 7.79  | 10.25 | 0.59  | 4 |        |                                     |
|           | CCRI45 | 14XJA | 20 | 139.90 | HAU1491a | 3.66  | 4.93  | 0.33  | 4 |        |                                     |
|           | CCRI45 | 14XJK | 20 | 139.90 | HAU1491a | 3.78  | 5.07  | 0.35  | 4 |        |                                     |
|           | CCRI45 | 15HNZ | 20 | 139.90 | HAU1491a | 3.94  | 5.30  | 0.44  | 4 |        |                                     |
| qFL-C21-1 | CCRI45 | 11HNA | 21 | 57.89  | CGR5217  | 2.77  | 3.76  | -0.68 | 2 |        |                                     |
|           | CCRI45 | 14XJA | 21 | 57.89  | CGR5217  | 2.97  | 4.02  | -0.54 | 2 |        |                                     |
| qFL-C21-2 | CCRI45 | 10HNA | 21 | 62.63  | NAU3731  | 2.75  | 3.73  | -0.65 | 1 |        |                                     |
| qFL-C21-4 | CCRI45 | 10HNA | 21 | 238.32 | GMLE0097 | 3.31  | 4.31  | 1.80  | 5 |        |                                     |
|           | CCRI45 | 11XJA | 21 | 238.32 | GMLE0097 | 2.65  | 3.60  | 0.56  | 5 |        |                                     |
|           | CCRI45 | 11HNA | 21 | 238.32 | GMLE0097 | 7.61  | 9.99  | 1.15  | 5 |        |                                     |
|           | CCRI45 | 14HNZ | 21 | 238.32 | GMLE0097 | 3.21  | 4.34  | 0.73  | 5 |        |                                     |
|           | CCRI45 | 15HNZ | 21 | 238.32 | GMLE0097 | 2.95  | 4.01  | 0.69  | 5 |        |                                     |
| qFL-C21-5 | CCRI45 | 10HNA | 21 | 241.43 | Gh132    | 3.32  | 4.53  | 1.43  | 8 |        |                                     |
|           | CCRI45 | 11XJA | 21 | 241.43 | Gh132    | 2.70  | 3.66  | 0.62  | 8 |        |                                     |

|           |        |       |    |        |          |      |       |       |   |        |                                                          |
|-----------|--------|-------|----|--------|----------|------|-------|-------|---|--------|----------------------------------------------------------|
|           | CCRI45 | 11HNA | 21 | 241.43 | Gh132    | 2.50 | 3.40  | 0.49  | 8 |        |                                                          |
|           | CCRI45 | 14XJK | 21 | 241.43 | Gh132    | 3.42 | 4.59  | 1.46  | 8 |        |                                                          |
|           | CCRI45 | 14HNZ | 21 | 241.43 | Gh132    | 4.31 | 5.77  | 1.38  | 8 |        |                                                          |
|           | CCRI45 | 14HNZ | 21 | 241.43 | Gh132    | 5.64 | 7.20  | 1.90  | 8 |        |                                                          |
|           | CCRI45 | 15HNA | 21 | 241.43 | Gh132    | 3.45 | 4.64  | 0.74  | 8 |        |                                                          |
|           | CCRI45 | 15HNZ | 21 | 241.43 | Gh132    | 3.47 | 4.67  | 0.57  | 8 |        |                                                          |
| qFL-C22-2 | CCRI45 | 10HNA | 22 | 142.70 | NAU2977  | 3.50 | 4.73  | 0.53  | 4 |        |                                                          |
|           | CCRI45 | 11XJA | 22 | 142.70 | NAU2977  | 4.08 | 5.49  | 0.68  | 4 |        |                                                          |
|           | CCRI45 | 11HNA | 22 | 142.70 | NAU2977  | 4.16 | 5.60  | 0.67  | 4 |        |                                                          |
|           | CCRI45 | 14HNZ | 22 | 142.70 | NAU2977  | 2.71 | 3.69  | 0.58  | 4 |        |                                                          |
| qFL-C22-3 | CCRI45 | 11XJA | 22 | 152.64 | NAU1325  | 7.55 | 9.91  | 0.92  | 3 |        |                                                          |
|           | CCRI45 | 11HNA | 22 | 152.64 | NAU1325  | 2.58 | 3.51  | 0.54  | 3 |        |                                                          |
|           | CCRI45 | 14XJK | 22 | 152.64 | NAU1325  | 4.44 | 5.98  | 0.68  | 3 |        |                                                          |
| qFL-C23-1 | CCRI45 | 11XJA | 23 | 23.95  | MUSB0442 | 3.84 | 5.18  | 0.45  | 1 |        |                                                          |
| qFL-C25-1 | CCRI45 | 14XJK | 25 | 29.03  | CGR5201a | 3.94 | 5.30  | -0.70 | 1 |        | Sun et al., 2012; Li et al., 2019b; Jamshed et al., 2016 |
| qFL-C26-2 | CCRI45 | 14XJK | 26 | 143.65 | MUSS439  | 4.23 | 5.68  | -0.93 | 1 |        |                                                          |
| qFL-C26-3 | CCRI45 | 14XJK | 26 | 149.57 | BNL2495  | 9.31 | 12.36 | -2.47 | 1 |        | Said et al., 2015b                                       |
| qFM-C2-1  | CCRI45 | 14HNZ | 2  | 118.16 | CGR5201b | 5.04 | 6.67  | -0.45 | 1 |        |                                                          |
| qFM-C4-1  | CCRI45 | 14HNZ | 4  | 28.82  | NAU0786  | 4.32 | 6.00  | -0.84 | 1 |        |                                                          |
| qFM-C5-1  | CCRI45 | 14HNZ | 5  | 89.92  | MUSS317  | 2.58 | 3.51  | -0.08 | 1 |        |                                                          |
| qFM-C5-2  | CCRI45 | 11HNA | 5  | 123.29 | DPL0384  | 2.76 | 3.82  | 0.32  | 1 |        | Tang et al., 2015                                        |
| qFM-C5-3  | CCRI45 | 10HNA | 5  | 158.09 | NAU3824a | 5.76 | 7.66  | 0.27  | 3 |        | Wang et al., 2017b                                       |
|           | CCRI45 | 11HNA | 5  | 158.09 | NAU3824a | 3.02 | 4.09  | 0.17  | 3 |        |                                                          |
|           | CCRI45 | 15HNA | 5  | 158.09 | NAU3824a | 2.54 | 3.45  | 0.16  | 3 |        |                                                          |
| qFM-C5-4  | CCRI45 | 10HNA | 5  | 205.12 | NAU3402  | 4.01 | 5.40  | 0.24  | 1 |        |                                                          |
| qFM-C7-1  | CCRI45 | 14XJK | 7  | 38.10  | HAU1367  | 2.89 | 5.63  | -0.10 | 1 |        | Shao et al., 2014                                        |
| qFM-C7-2  | CCRI45 | 09HNA | 7  | 85.06  | NAU2002  | 3.14 | 7.37  | 0.87  | 2 |        | Li et al., 2019b                                         |
|           | CCRI45 | 10HNA | 7  | 85.06  | NAU2002  | 2.87 | 6.25  | 0.58  | 2 |        |                                                          |
| qFM-C11-1 | CCRI45 | 10HNA | 11 | 21.99  | HAU2974  | 2.55 | 3.61  | 0.26  | 1 |        |                                                          |
| qFM-C13-1 | CCRI45 | 11HNA | 13 | 0.00   | HAU0371  | 3.34 | 4.51  | 0.28  | 1 |        |                                                          |
| qFM-C15-1 | CCRI45 | 10HNA | 15 | 26.90  | HAU1058a | 2.91 | 3.99  | 0.19  | 2 |        | Chen et al., 2018; Wang et al., 2016                     |
|           | CCRI45 | 11HNA | 15 | 26.90  | HAU1058a | 2.62 | 3.59  | 0.15  | 2 |        |                                                          |
| qFM-C16-1 | CCRI45 | 09HNA | 16 | 16.79  | CGR5149  | 2.52 | 3.43  | 0.24  | 2 |        |                                                          |
|           | CCRI45 | 10HNA | 16 | 16.79  | CGR5149  | 3.34 | 4.52  | 0.20  | 2 |        |                                                          |
| qFM-C17-2 | CCRI45 | 15HNA | 17 | 47.26  | NAU2909  | 2.72 | 3.68  | -0.18 | 2 | BI-QTL | Zhai et al., 2016                                        |
|           | CCRI45 | 15HNZ | 17 | 47.26  | NAU2909  | 4.30 | 5.76  | -0.20 | 2 |        |                                                          |
| qFM-C21-1 | CCRI45 | 14XJA | 21 | 235.09 | CICR0383 | 2.76 | 3.75  | 0.23  | 1 |        |                                                          |
| qFM-C24-1 | CCRI45 | 11HNA | 24 | 115.70 | NAU3804  | 3.25 | 4.39  | 0.22  | 1 |        |                                                          |
| qFM-C24-2 | CCRI45 | 09HNA | 24 | 134.95 | NAU5399  | 2.54 | 3.49  | 0.69  | 3 |        | Shi et al., 2019                                         |
|           | CCRI45 | 10HNA | 24 | 134.95 | NAU5399  | 3.94 | 5.36  | 0.99  | 3 |        |                                                          |
|           | CCRI45 | 11HNA | 24 | 134.95 | NAU5399  | 3.88 | 5.26  | 1.36  | 3 |        |                                                          |
| qFM-C25-1 | CCRI45 | 10HNA | 25 | 4.94   | BNL0827  | 3.45 | 4.69  | 0.10  | 2 |        | Chen et al., 2018; Wang et al., 2011                     |
|           | CCRI45 | 11HNA | 25 | 4.94   | BNL0827  | 2.78 | 3.79  | 0.11  | 2 |        |                                                          |
| qFM-C25-2 | CCRI45 | 14HNZ | 25 | 25.50  | Gh537    | 6.27 | 8.31  | -0.27 | 2 |        | Li et al., 2019b; Jamshed et al., 2016                   |
|           | CCRI45 | 15HNZ | 25 | 25.50  | Gh537    | 3.27 | 4.40  | -0.18 | 2 |        |                                                          |
| qFM-C25-3 | CCRI45 | 14HNZ | 25 | 29.03  | CGR5201a | 3.11 | 4.20  | -0.17 | 2 |        | Sun et al., 2012; Shen et al., 2005; Li et al., 2019b    |
|           | CCRI45 | 15HNZ | 25 | 29.03  | CGR5201a | 6.23 | 8.37  | -0.45 | 2 |        |                                                          |
| qFS-C2-1  | CCRI45 | 09HNA | 2  | 54.78  | HAU1980b | 2.66 | 3.61  | 0.85  | 7 |        |                                                          |
|           | CCRI45 | 11XJA | 2  | 54.78  | HAU1980b | 7.59 | 9.88  | 1.27  | 7 |        |                                                          |

|           |        |       |    |        |            |       |       |       |   |        |                                                                             |
|-----------|--------|-------|----|--------|------------|-------|-------|-------|---|--------|-----------------------------------------------------------------------------|
|           | CCRI45 | 11HNA | 2  | 54.78  | HAU1980b   | 6.13  | 8.37  | 1.23  | 7 |        |                                                                             |
|           | CCRI45 | 14XJA | 2  | 54.78  | HAU1980b   | 3.72  | 5.18  | 0.84  | 7 |        |                                                                             |
|           | CCRI45 | 14HNZ | 2  | 54.78  | HAU1980b   | 4.83  | 6.61  | 1.10  | 7 |        |                                                                             |
|           | CCRI45 | 15HNA | 2  | 54.78  | HAU1980b   | 6.35  | 8.50  | 1.83  | 7 |        |                                                                             |
|           | CCRI45 | 15HNZ | 2  | 54.78  | HAU1980b   | 2.56  | 3.47  | 0.68  | 7 |        |                                                                             |
| qFS-C2-2  | CCRI45 | 11XJA | 2  | 178.82 | NAU2277    | 3.97  | 5.36  | 0.75  | 3 |        |                                                                             |
|           | CCRI45 | 11HNA | 2  | 178.82 | NAU2277    | 4.57  | 6.12  | 0.84  | 3 |        |                                                                             |
|           | CCRI45 | 15HNA | 2  | 178.82 | NAU2277    | 2.66  | 3.60  | 0.96  | 3 |        |                                                                             |
| qFS-C6-1  | CCRI45 | 11XJA | 6  | 0.00   | NAU5038    | 3.51  | 4.76  | 0.58  | 4 |        |                                                                             |
|           | CCRI45 | 14XJA | 6  | 0.00   | NAU5038    | 3.11  | 4.21  | 0.50  | 4 |        |                                                                             |
|           | CCRI45 | 14XJK | 6  | 0.00   | NAU5038    | 2.54  | 3.46  | 0.59  | 4 |        |                                                                             |
|           | CCRI45 | 15HNA | 6  | 0.00   | NAU5038    | 3.27  | 4.41  | 0.88  | 4 |        |                                                                             |
| qFS-C7-1  | CCRI45 | 11XJA | 7  | 38.10  | HAU1367    | 2.71  | 3.69  | 0.28  | 1 |        |                                                                             |
| qFS-C7-2  | CCRI45 | 10HNA | 7  | 53.19  | PGML0199   | 3.21  | 4.34  | 0.63  | 3 |        |                                                                             |
|           | CCRI45 | 11XJA | 7  | 53.19  | PGML0199   | 5.84  | 7.78  | 0.82  | 3 |        |                                                                             |
|           | CCRI45 | 11HNA | 7  | 53.19  | PGML0199   | 16.07 | 19.93 | 1.38  | 3 |        |                                                                             |
| qFS-C7-3  | CCRI45 | 09HNA | 7  | 77.11  | NAU1048    | 4.36  | 5.85  | 0.65  | 4 |        | Sun et al., 2012; Li et al., 2019b; Jamshed et al., 2016; Deng et al., 2019 |
|           | CCRI45 | 11XJA | 7  | 77.11  | NAU1048    | 3.46  | 5.11  | 0.57  | 4 |        |                                                                             |
|           | CCRI45 | 11HNA | 7  | 77.11  | NAU1048    | 4.57  | 6.68  | 0.68  | 4 |        |                                                                             |
|           | CCRI45 | 15HNA | 7  | 77.11  | NAU1048    | 3.17  | 4.28  | 0.61  | 4 |        |                                                                             |
| qFS-C7-4  | CCRI45 | 11HNA | 7  | 92.24  | NAU1085    | 6.13  | 8.34  | 1.23  | 3 | BI-QTL | Sun et al., 2012; Song et al., 2017; Li et al., 2019b; Jamshed et al., 2016 |
|           | CCRI45 | 14XJA | 7  | 92.24  | NAU1085    | 3.72  | 5.17  | 0.84  | 3 |        |                                                                             |
|           | CCRI45 | 14HNZ | 7  | 92.24  | NAU1085    | 4.83  | 6.59  | 1.10  | 3 |        |                                                                             |
| qFS-C9-1  | CCRI45 | 09HNA | 9  | 203.99 | NAU2354    | 2.94  | 4.03  | 0.68  | 7 |        | Ning et al., 2014; Wang et al., 2015                                        |
|           | CCRI45 | 11XJA | 9  | 203.99 | NAU2354    | 9.89  | 12.92 | 0.86  | 7 |        |                                                                             |
|           | CCRI45 | 14XJA | 9  | 203.99 | NAU2354    | 10.32 | 13.40 | 0.80  | 7 |        |                                                                             |
|           | CCRI45 | 14XJK | 9  | 203.99 | NAU2354    | 6.66  | 8.88  | 0.85  | 7 |        |                                                                             |
|           | CCRI45 | 14HNZ | 9  | 203.99 | NAU2354    | 4.55  | 6.16  | 0.63  | 7 |        |                                                                             |
|           | CCRI45 | 15HNA | 9  | 203.99 | NAU2354    | 4.28  | 5.73  | 0.90  | 7 |        |                                                                             |
|           | CCRI45 | 15HNZ | 9  | 203.99 | NAU2354    | 3.14  | 4.29  | 0.58  | 7 |        |                                                                             |
| qFS-C10-1 | CCRI45 | 11XJA | 10 | 91.66  | DPL0468    | 3.42  | 4.64  | 0.55  | 1 |        | Li et al., 2019b                                                            |
| qFS-C10-2 | CCRI45 | 14XJA | 10 | 157.72 | PGML00696b | 2.77  | 3.76  | -0.62 | 1 |        | Zhai et al., 2016                                                           |
| qFS-C10-3 | CCRI45 | 10HNA | 10 | 178.11 | BNL3563    | 3.23  | 4.38  | 0.68  | 3 |        |                                                                             |
|           | CCRI45 | 11XJA | 10 | 178.11 | BNL3563    | 8.23  | 10.79 | 1.03  | 3 |        |                                                                             |
|           | CCRI45 | 11HNA | 10 | 178.11 | BNL3563    | 18.84 | 22.94 | 1.58  | 3 |        |                                                                             |
| qFS-C11-3 | CCRI45 | 09HNA | 11 | 124.65 | Gh074b     | 4.88  | 6.53  | 0.59  | 2 |        |                                                                             |
|           | CCRI45 | 11XJA | 11 | 124.65 | Gh074b     | 4.01  | 5.41  | 0.38  | 2 |        |                                                                             |
| qFS-C11-5 | CCRI45 | 11HNA | 11 | 146.91 | DPL0528    | 3.54  | 4.78  | -0.74 | 1 |        | Jamshed et al., 2016                                                        |
| qFS-C11-6 | CCRI45 | 09HNA | 11 | 164.92 | HAU2836b   | 2.55  | 3.47  | 0.88  | 4 |        | Shi et al., 2019; Jamshed et al., 2016                                      |
|           | CCRI45 | 11XJA | 11 | 164.92 | HAU2836b   | 2.60  | 3.55  | 0.62  | 4 |        |                                                                             |
|           | CCRI45 | 11HNA | 11 | 164.92 | HAU2836b   | 2.80  | 3.80  | 0.68  | 4 |        |                                                                             |
|           | CCRI45 | 14XJK | 11 | 164.92 | HAU2836b   | 2.82  | 3.83  | 0.77  | 4 |        |                                                                             |
| qFS-C12-1 | CCRI45 | 09HNA | 12 | 84.57  | HAU1361    | 3.68  | 5.46  | 0.65  | 5 |        | wang et al., 2012, Shi et al., 2019                                         |
|           | CCRI45 | 11XJA | 12 | 84.57  | HAU1361    | 4.26  | 6.21  | 1.08  | 5 |        |                                                                             |
|           | CCRI45 | 11HNA | 12 | 84.57  | HAU1361    | 6.15  | 8.72  | 0.90  | 5 |        |                                                                             |
|           | CCRI45 | 14XJA | 12 | 84.57  | HAU1361    | 4.33  | 5.81  | 0.51  | 5 |        |                                                                             |
|           | CCRI45 | 14HNZ | 12 | 84.57  | HAU1361    | 3.66  | 4.94  | 0.47  | 5 |        |                                                                             |
| qFS-C12-2 | CCRI45 | 09HNA | 12 | 110.86 | NAU4889    | 4.58  | 6.12  | 1.36  | 4 |        |                                                                             |
|           | CCRI45 | 11XJA | 12 | 110.86 | NAU4889    | 3.37  | 4.56  | 1.07  | 4 |        |                                                                             |
|           | CCRI45 | 11HNA | 12 | 110.86 | NAU4889    | 3.75  | 5.08  | 0.79  | 4 |        |                                                                             |
|           | CCRI45 | 15HNA | 12 | 110.86 | NAU4889    | 9.47  | 12.28 | 1.30  | 4 |        |                                                                             |



|           |        |       |    |        |          |       |       |       |   |        |                                     |
|-----------|--------|-------|----|--------|----------|-------|-------|-------|---|--------|-------------------------------------|
| qFS-C12-3 | CCRI45 | 09HNA | 12 | 137.96 | DPL0343  | 4.66  | 7.35  | -0.75 | 2 |        |                                     |
|           | CCRI45 | 14XJK | 12 | 137.96 | DPL0343  | 2.78  | 4.07  | -0.67 | 2 |        |                                     |
| qFS-C13-1 | CCRI45 | 11XJA | 13 | 8.68   | BNL1707  | 2.53  | 3.44  | 0.62  | 2 |        |                                     |
|           | CCRI45 | 11HNA | 13 | 8.68   | BNL1707  | 3.90  | 5.25  | 0.80  | 2 |        |                                     |
| qFS-C13-2 | CCRI45 | 14XJK | 13 | 32.18  | NAU2730  | 4.81  | 6.72  | -2.33 | 1 |        |                                     |
| qFS-C13-3 | CCRI45 | 11XJA | 13 | 164.25 | CGR5242  | 4.10  | 5.53  | 0.83  | 2 |        |                                     |
|           | CCRI45 | 11HNA | 13 | 164.25 | CGR5242  | 3.49  | 4.42  | 1.68  | 2 |        |                                     |
| qFS-C14-1 | CCRI45 | 09HNA | 14 | 40.73  | NAU3648  | 3.77  | 5.08  | 0.75  | 6 |        | Zhai et al., 2016                   |
|           | CCRI45 | 11XJA | 14 | 40.73  | NAU3648  | 12.19 | 15.55 | 1.43  | 6 |        |                                     |
|           | CCRI45 | 11HNA | 14 | 40.73  | NAU3648  | 2.73  | 3.69  | 1.09  | 6 |        |                                     |
|           | CCRI45 | 14XJA | 14 | 40.73  | NAU3648  | 4.03  | 5.42  | 1.20  | 6 |        |                                     |
|           | CCRI45 | 15HNA | 14 | 40.73  | NAU3648  | 3.15  | 4.25  | 0.87  | 6 |        |                                     |
|           | CCRI45 | 15HNZ | 14 | 40.73  | NAU3648  | 5.57  | 7.41  | 1.04  | 6 |        |                                     |
| qFS-C14-2 | CCRI45 | 09HNA | 14 | 113.15 | CGR6383  | 3.02  | 4.16  | 1.46  | 1 |        |                                     |
| qFS-C14-3 | CCRI45 | 11XJA | 14 | 171.34 | NAU3225  | 4.92  | 6.60  | 0.70  | 1 |        |                                     |
| qFS-C14-4 | CCRI45 | 09HNA | 14 | 206.88 | HAU1219a | 2.58  | 3.51  | -0.77 | 3 |        |                                     |
|           | CCRI45 | 11HNA | 14 | 206.88 | HAU1219a | 3.22  | 4.35  | -1.16 | 3 |        |                                     |
|           | CCRI45 | 15HNZ | 14 | 206.88 | HAU1219a | 2.51  | 3.40  | -0.84 | 3 |        |                                     |
| qFS-C15-1 | CCRI45 | 09HNA | 15 | 19.51  | HAU1045  | 5.17  | 7.24  | 1.08  | 4 |        |                                     |
|           | CCRI45 | 11XJA | 15 | 19.51  | HAU1045  | 2.95  | 4.21  | 0.99  | 4 |        |                                     |
|           | CCRI45 | 14XJA | 15 | 19.51  | HAU1045  | 2.81  | 3.66  | 0.59  | 4 |        |                                     |
|           | CCRI45 | 14XJK | 15 | 19.51  | HAU1045  | 3.41  | 4.62  | 0.51  | 4 |        |                                     |
| qFS-C15-2 | CCRI45 | 09HNA | 15 | 26.90  | HAU1058a | 6.72  | 8.93  | 1.03  | 5 |        | Chen et al., 2018                   |
|           | CCRI45 | 11XJA | 15 | 26.90  | HAU1058a | 3.09  | 4.17  | 0.88  | 5 |        |                                     |
|           | CCRI45 | 14XJA | 15 | 26.90  | HAU1058a | 3.02  | 4.10  | 0.84  | 5 |        |                                     |
|           | CCRI45 | 14XJK | 15 | 26.90  | HAU1058a | 4.82  | 6.42  | 0.74  | 5 |        |                                     |
|           | CCRI45 | 15HNA | 15 | 26.90  | HAU1058a | 4.71  | 6.33  | 0.67  | 5 |        |                                     |
| qFS-C15-3 | CCRI45 | 09HNA | 15 | 43.61  | NAU3177  | 4.53  | 6.05  | 1.39  | 4 | BI-QTL | Li et al., 2019b                    |
|           | CCRI45 | 11XJA | 15 | 43.61  | NAU3177  | 4.87  | 6.20  | 1.55  | 4 |        |                                     |
|           | CCRI45 | 11HNA | 15 | 43.61  | NAU3177  | 4.21  | 5.66  | 1.23  | 4 |        |                                     |
|           | CCRI45 | 15HNA | 15 | 43.61  | NAU3177  | 4.38  | 5.99  | 1.45  | 4 |        |                                     |
| qFS-C15-4 | CCRI45 | 09HNA | 15 | 55.21  | NAU3714  | 2.91  | 3.94  | 1.05  | 4 |        |                                     |
|           | CCRI45 | 11XJA | 15 | 55.21  | NAU3714  | 3.54  | 4.78  | 1.40  | 4 |        |                                     |
|           | CCRI45 | 14XJA | 15 | 55.21  | NAU3714  | 3.01  | 4.09  | 0.91  | 4 |        |                                     |
|           | CCRI45 | 14XJK | 15 | 55.21  | NAU3714  | 6.12  | 8.12  | 1.17  | 4 |        |                                     |
| qFS-C15-6 | CCRI45 | 11HNA | 15 | 177.43 | MUSS085  | 5.93  | 7.88  | -0.95 | 1 |        | Li et al., 2019b                    |
| qFS-C16-1 | CCRI45 | 09HNA | 16 | 16.79  | CGR5149  | 3.57  | 4.82  | 0.76  | 5 |        |                                     |
|           | CCRI45 | 11XJA | 16 | 16.79  | CGR5149  | 2.66  | 3.61  | 0.79  | 5 |        |                                     |
|           | CCRI45 | 14XJA | 16 | 16.79  | CGR5149  | 2.70  | 3.65  | 0.65  | 5 |        |                                     |
|           | CCRI45 | 14XJK | 16 | 16.79  | CGR5149  | 6.15  | 8.17  | 0.84  | 5 |        |                                     |
|           | CCRI45 | 15HNZ | 16 | 16.79  | CGR5149  | 6.35  | 8.40  | 0.77  | 5 |        |                                     |
| qFS-C16-3 | CCRI45 | 11XJA | 16 | 65.97  | BNL2634  | 10.37 | 13.37 | 1.24  | 3 | BI-QTL | Shen et al., 2005; Li et al., 2019b |
|           | CCRI45 | 11HNA | 16 | 65.97  | BNL2634  | 3.09  | 4.18  | 1.03  | 3 |        |                                     |
|           | CCRI45 | 15HNA | 16 | 65.97  | BNL2634  | 2.81  | 3.82  | 0.63  | 3 |        |                                     |
| qFS-C17-1 | CCRI45 | 11XJA | 17 | 47.26  | NAU2909  | 2.93  | 3.99  | 0.68  | 3 |        | Ning et al., 2014                   |
|           | CCRI45 | 11HNA | 17 | 47.26  | NAU2909  | 8.04  | 10.52 | 1.16  | 3 |        |                                     |
|           | CCRI45 | 15HNA | 17 | 47.26  | NAU2909  | 3.90  | 5.23  | 1.22  | 3 |        |                                     |
| qFS-C17-2 | CCRI45 | 11HNA | 17 | 56.36  | NAU2325  | 5.12  | 6.83  | -0.94 | 1 |        |                                     |
| qFS-C17-3 | CCRI45 | 11XJA | 17 | 122.79 | HAU0195a | 2.73  | 4.42  | 0.29  | 2 | BI-QTL | Li et al., 2019b                    |
|           | CCRI45 | 14XJA | 17 | 122.79 | HAU0195a | 2.80  | 4.51  | 0.32  | 2 |        |                                     |
| qFS-C19-1 | CCRI45 | 10HNA | 19 | 17.39  | NAU3405  | 2.62  | 3.56  | 0.65  | 3 |        |                                     |
|           | CCRI45 | 11XJA | 19 | 17.39  | NAU3405  | 6.80  | 9.00  | 0.99  | 3 |        |                                     |
|           | CCRI45 | 11HNA | 19 | 17.39  | NAU3405  | 15.48 | 19.27 | 1.53  | 3 |        |                                     |
| qFS-C19-2 | CCRI45 | 11HNA | 19 | 161.66 | DPL0215  | 2.52  | 3.40  | -1.80 | 1 |        | Guo et al., 2015                    |
| qFS-C20-3 | CCRI45 | 09HNA | 20 | 139.90 | HAU1491a | 4.66  | 6.38  | 0.55  | 7 |        |                                     |

|           |        |       |    |        |          |       |       |       |   |  |                                                         |
|-----------|--------|-------|----|--------|----------|-------|-------|-------|---|--|---------------------------------------------------------|
|           | CCRI45 | 11XJA | 20 | 139.90 | HAU1491a | 4.25  | 5.71  | 0.52  | 7 |  |                                                         |
|           | CCRI45 | 11HNA | 20 | 139.90 | HAU1491a | 2.63  | 3.55  | 0.61  | 7 |  |                                                         |
|           | CCRI45 | 14XJA | 20 | 139.90 | HAU1491a | 3.34  | 4.51  | 0.63  | 7 |  |                                                         |
|           | CCRI45 | 14HNZ | 20 | 139.90 | HAU1491a | 2.93  | 3.95  | 0.29  | 7 |  |                                                         |
|           | CCRI45 | 15HNA | 20 | 139.90 | HAU1491a | 5.72  | 6.90  | 0.63  | 7 |  |                                                         |
|           | CCRI45 | 15HNZ | 20 | 139.90 | HAU1491a | 2.51  | 3.41  | 0.40  | 7 |  |                                                         |
| qFS-C21-1 | CCRI45 | 11HNA | 21 | 57.89  | CGR5217  | 2.91  | 3.95  | -0.79 | 1 |  | Shao et al., 2014; Sun et al., 2010                     |
| qFS-C21-2 | CCRI45 | 09HNA | 21 | 209.88 | CIR068   | 2.55  | 3.47  | 0.67  | 2 |  | Guo et al., 2015                                        |
|           | CCRI45 | 14XJA | 21 | 209.88 | CIR068   | 2.91  | 3.95  | 0.46  | 2 |  |                                                         |
| qFS-C21-4 | CCRI45 | 09HNA | 21 | 238.32 | CIR068   | 2.79  | 3.78  | 1.08  | 2 |  | Wang et al., 2010; Sun et al., 2010                     |
|           | CCRI45 | 11HNA | 21 | 238.32 | CIR068   | 3.73  | 5.00  | 2.19  | 2 |  |                                                         |
| qFS-C21-5 | CCRI45 | 11HNA | 21 | 241.43 | Gh132    | 4.27  | 5.51  | 1.87  | 2 |  |                                                         |
|           | CCRI45 | 15HNA | 21 | 241.43 | Gh132    | 3.03  | 4.09  | 1.11  | 2 |  |                                                         |
| qFS-C22-1 | CCRI45 | 09HNA | 22 | 34.13  | NAU3824b | 3.78  | 5.09  | 0.94  | 5 |  | Ning et al., 2014; Yang et al., 2015                    |
|           | CCRI45 | 11XJA | 22 | 34.13  | NAU3824b | 3.73  | 5.01  | 1.23  | 5 |  |                                                         |
|           | CCRI45 | 14XJA | 22 | 34.13  | NAU3824b | 3.63  | 4.89  | 1.10  | 5 |  |                                                         |
|           | CCRI45 | 14XJK | 22 | 34.13  | NAU3824b | 5.36  | 7.17  | 0.97  | 5 |  |                                                         |
|           | CCRI45 | 15HNA | 22 | 34.13  | NAU3824b | 5.15  | 6.87  | 0.84  | 5 |  |                                                         |
| qFS-C22-2 | CCRI45 | 09HNA | 22 | 108.24 | CIR224a  | 5.05  | 6.75  | 0.86  | 6 |  |                                                         |
|           | CCRI45 | 11XJA | 22 | 108.24 | CIR224a  | 3.69  | 4.98  | 0.96  | 6 |  |                                                         |
|           | CCRI45 | 11HNA | 22 | 108.24 | CIR224a  | 2.61  | 3.55  | 0.72  | 6 |  |                                                         |
|           | CCRI45 | 14XJA | 22 | 108.24 | CIR224a  | 2.90  | 3.92  | 1.12  | 6 |  |                                                         |
|           | CCRI45 | 14XJK | 22 | 108.24 | CIR224a  | 4.37  | 5.88  | 0.91  | 6 |  |                                                         |
|           | CCRI45 | 15HNA | 22 | 108.24 | CIR224a  | 3.30  | 4.46  | 1.09  | 6 |  |                                                         |
| qFS-C22-3 | CCRI45 | 10HNA | 22 | 152.64 | NAU1325  | 2.79  | 3.79  | 0.63  | 3 |  |                                                         |
|           | CCRI45 | 11XJA | 22 | 152.64 | NAU1325  | 7.24  | 9.55  | 0.97  | 3 |  |                                                         |
|           | CCRI45 | 11HNA | 22 | 152.64 | NAU1325  | 17.15 | 21.12 | 1.52  | 3 |  |                                                         |
| qFS-C23-1 | CCRI45 | 11XJA | 23 | 23.95  | MUSB0442 | 2.53  | 3.58  | 0.96  | 4 |  |                                                         |
|           | CCRI45 | 11HNA | 23 | 23.95  | MUSB0442 | 3.63  | 4.89  | 0.77  | 4 |  |                                                         |
|           | CCRI45 | 14XJA | 23 | 23.95  | MUSB0442 | 7.39  | 9.74  | 0.70  | 4 |  |                                                         |
|           | CCRI45 | 15HNA | 23 | 23.95  | MUSB0442 | 4.22  | 5.66  | 0.49  | 4 |  |                                                         |
| qFS-C24-1 | CCRI45 | 09HNA | 24 | 93.44  | NAU2914  | 3.55  | 4.94  | 0.78  | 4 |  | Zhang et al., 2012; Huang et al., 2018; Li et al., 2019 |
|           | CCRI45 | 11XJA | 24 | 93.44  | NAU2914  | 5.43  | 7.34  | 0.73  | 4 |  |                                                         |
|           | CCRI45 | 14XJA | 24 | 93.44  | NAU2914  | 5.59  | 7.57  | 1.16  | 4 |  |                                                         |
|           | CCRI45 | 14XJK | 24 | 93.44  | NAU2914  | 6.54  | 8.86  | 0.89  | 4 |  |                                                         |
| qFS-C24-2 | CCRI45 | 09HNA | 24 | 108.73 | NAU2914  | 2.67  | 3.63  | 0.65  | 6 |  |                                                         |
|           | CCRI45 | 11XJA | 24 | 108.73 | NAU2914  | 4.85  | 6.49  | 1.04  | 6 |  |                                                         |
|           | CCRI45 | 14XJA | 24 | 108.73 | NAU2914  | 3.21  | 4.35  | 0.63  | 6 |  |                                                         |
|           | CCRI45 | 14XJK | 24 | 108.73 | NAU2914  | 6.74  | 8.92  | 0.86  | 6 |  |                                                         |
|           | CCRI45 | 14HNZ | 24 | 108.73 | NAU2914  | 2.94  | 3.98  | 0.89  | 6 |  |                                                         |
|           | CCRI45 | 15HNA | 24 | 108.73 | NAU2914  | 3.60  | 4.86  | 0.58  | 6 |  |                                                         |
| qFS-C25-1 | CCRI45 | 14XJK | 25 | 4.94   | BNL0827  | 3.04  | 4.14  | 0.41  | 1 |  | Shao et al., 2014                                       |
| qFS-C25-2 | CCRI45 | 14HNZ | 25 | 29.03  | CGR5201a | 3.07  | 4.31  | 1.29  | 1 |  | Sun et al., 2012; Li et al., 2010                       |
| qFS-C25-4 | CCRI45 | 11XJA | 25 | 132.06 | NAU2397  | 3.22  | 4.36  | 0.61  | 3 |  |                                                         |
|           | CCRI45 | 11HNA | 25 | 132.06 | NAU2397  | 3.30  | 4.46  | 0.65  | 3 |  |                                                         |
|           | CCRI45 | 14HNZ | 25 | 132.06 | NAU2397  | 2.84  | 3.85  | 0.61  | 3 |  |                                                         |
| qFS-C26-1 | CCRI45 | 09HNA | 26 | 0.00   | NAU1100  | 11.92 | 15.24 | 1.00  | 7 |  |                                                         |
|           | CCRI45 | 11XJA | 26 | 0.00   | NAU1100  | 7.41  | 9.74  | 0.94  | 7 |  |                                                         |
|           | CCRI45 | 14XJA | 26 | 0.00   | NAU1100  | 9.97  | 12.88 | 1.30  | 7 |  |                                                         |
|           | CCRI45 | 14XJK | 26 | 0.00   | NAU1100  | 2.62  | 3.56  | 0.51  | 7 |  |                                                         |
|           | CCRI45 | 14HNZ | 26 | 0.00   | NAU1100  | 2.57  | 3.48  | 0.74  | 7 |  |                                                         |
|           | CCRI45 | 15HNA | 26 | 0.00   | NAU1100  | 2.71  | 3.67  | 0.57  | 7 |  |                                                         |
|           | CCRI45 | 15HNZ | 26 | 0.00   | NAU1100  | 7.22  | 9.50  | 0.71  | 7 |  |                                                         |
| qFS-C26-2 | CCRI45 | 09HNA | 26 | 4.62   | NAU2920  | 6.48  | 8.57  | 1.09  | 4 |  |                                                         |
|           | CCRI45 | 11XJA | 26 | 4.62   | NAU2920  | 6.09  | 8.08  | 0.88  | 4 |  |                                                         |
|           | CCRI45 | 14XJA | 26 | 4.62   | NAU2920  | 9.05  | 11.80 | 0.90  | 4 |  |                                                         |

|  |        |       |    |      |         |      |      |      |   |  |  |
|--|--------|-------|----|------|---------|------|------|------|---|--|--|
|  | CCRI45 | 14XJK | 26 | 4.62 | NAU2920 | 5.99 | 7.95 | 0.67 | 4 |  |  |
|--|--------|-------|----|------|---------|------|------|------|---|--|--|

Env., Environment; No. of EE, No. of environments of QTL expression; BI-QTL, background-independent QTL
