# Supplementary material for: Examining two sets of introgression lines across multiple environments reveals background-independent and stably expressed quantitative trait loci of fiber quality in cotton
Source: PubMed Central journal article supplement (PMC7311500; doi:10.1007/s00122-020-03578-0), 2020-03-17
Supplement: 122_2020_3578_MOESM7_ESM.pdf [file 122_2020_3578_MOESM7_ESM.pdf]

**Table S4** Details of QTL clusters for fiber-quality traits in CSSL populations

| Cluster name | QTL       | Background | Env.  | Chr    | Position | Nearest marker | LOD   | PVE(%) | Add   | Note   | previous reports                                                                               |
|--------------|-----------|------------|-------|--------|----------|----------------|-------|--------|-------|--------|------------------------------------------------------------------------------------------------|
| BISER-C2-1   | qFL-C2-6  | CCRI36     | 11LNL | 2      | 178.82   | NAU2277        | 5.20  | 5.68   | 0.56  | BI-QTL |                                                                                                |
|              | qFL-C2-6  | CCRI45     | 10HNA | 2      | 178.82   | NAU2277        | 4.42  | 5.92   | 0.71  | BI-QTL |                                                                                                |
|              |           | CCRI45     | 11XJA | 2      | 178.82   | NAU2277        | 4.56  | 6.13   | 0.71  |        |                                                                                                |
|              |           | CCRI45     | 11HNA | 2      | 178.82   | NAU2277        | 2.56  | 3.48   | 0.56  |        |                                                                                                |
|              |           | CCRI45     | 14HNZ | 2      | 178.82   | NAU2277        | 3.19  | 4.32   | 0.51  |        |                                                                                                |
|              | qFS-C2-2  | CCRI45     | 11XJA | 2      | 178.82   | NAU2277        | 3.97  | 5.36   | 0.75  |        |                                                                                                |
|              |           | CCRI45     | 11HNA | 2      | 178.82   | NAU2277        | 4.57  | 6.12   | 0.84  |        |                                                                                                |
|              | CCRI45    | 15HNA      | 2     | 178.82 | NAU2277  | 2.66           | 3.60  | 0.96   |       |        |                                                                                                |
| BISER-C7-1   | qFL-C7-3  | CCRI36     | 10HNA | 7      | 92.24    | NAU1085        | 3.62  | 3.98   | 1.13  | BI-QTL | Sun et al., 2012; Song et al., 2017; Li et al., 2019b; Jamshed et al., 2016; Deng et al., 2019 |
|              |           | CCRI36     | 11HNA | 7      | 92.24    | NAU1085        | 3.93  | 4.32   | 1.01  |        |                                                                                                |
|              |           | CCRI36     | 11LNL | 7      | 92.24    | NAU1085        | 3.07  | 3.39   | 0.87  |        |                                                                                                |
|              |           | CCRI36     | 11XJS | 7      | 92.24    | NAU1085        | 2.63  | 2.91   | 0.80  |        |                                                                                                |
|              |           | CCRI36     | 14XJN | 7      | 92.24    | NAU1085        | 2.84  | 3.14   | 0.97  |        |                                                                                                |
|              |           | CCRI36     | 14XJS | 7      | 92.24    | NAU1085        | 2.97  | 3.27   | 0.89  |        |                                                                                                |
|              | qFL-C7-3  | CCRI45     | 10HNA | 7      | 92.24    | NAU1085        | 10.65 | 13.64  | 1.34  | BI-QTL | Sun et al., 2012; Song et al., 2017; Li et al., 2019b; Jamshed et al., 2016; Deng et al., 2019 |
|              |           | CCRI45     | 11HNA | 7      | 92.24    | NAU1085        | 7.11  | 9.64   | 1.17  |        |                                                                                                |
|              |           | CCRI45     | 14XJA | 7      | 92.24    | NAU1085        | 4.50  | 6.19   | 0.72  |        |                                                                                                |
|              |           | CCRI45     | 14XJK | 7      | 92.24    | NAU1085        | 3.43  | 4.78   | 0.81  |        |                                                                                                |
|              |           | CCRI45     | 14HNZ | 7      | 92.24    | NAU1085        | 8.60  | 11.38  | 1.03  |        |                                                                                                |
|              | qFM-C7-3  | CCRI36     | 11LNL | 7      | 92.24    | NAU1085        | 3.41  | 3.76   | -0.25 |        | Sun et al., 2012                                                                               |
|              |           | CCRI36     | 11LNL | 7      | 92.24    | NAU1085        | 3.41  | 3.76   | -0.25 |        |                                                                                                |
|              | qFS-C7-4  | CCRI36     | 10HNA | 7      | 92.24    | NAU1085        | 3.27  | 3.60   | 1.29  | BI-QTL | Sun et al., 2012; Song et al., 2017; Li et al., 2019b; Jamshed et al., 2016                    |
|              |           | CCRI36     | 11HNA | 7      | 92.24    | NAU1085        | 3.16  | 3.49   | 1.13  |        |                                                                                                |
|              |           | CCRI36     | 11LNL | 7      | 92.24    | NAU1085        | 2.95  | 3.26   | 0.96  |        |                                                                                                |
|              |           | CCRI36     | 11XJS | 7      | 92.24    | NAU1085        | 2.88  | 3.19   | 0.95  |        |                                                                                                |
|              | qFS-C7-4  | CCRI45     | 11HNA | 7      | 92.24    | NAU1085        | 6.13  | 8.34   | 1.23  | BI-QTL | Sun et al., 2012; Song et al., 2017; Li et al., 2019b; Jamshed et al., 2016                    |
|              |           | CCRI45     | 14XJA | 7      | 92.24    | NAU1085        | 3.72  | 5.17   | 0.84  |        |                                                                                                |
|              |           | CCRI45     | 14HNZ | 7      | 92.24    | NAU1085        | 4.83  | 6.59   | 1.10  |        |                                                                                                |
| BISER-C15-1  | qFL-C15-1 | CCRI36     | 10HNA | 15     | 43.61    | NAU3177        | 3.29  | 3.71   | 0.33  | BI-QTL |                                                                                                |
|              |           | CCRI36     | 11HNA | 15     | 43.61    | NAU3177        | 4.26  | 5.36   | 0.42  |        |                                                                                                |
|              |           | CCRI36     | 11LNL | 15     | 43.61    | NAU3177        | 4.00  | 4.89   | 0.46  |        |                                                                                                |
|              |           | CCRI36     | 11XJS | 15     | 43.61    | NAU3177        | 4.43  | 5.18   | 0.41  |        |                                                                                                |
|              |           | CCRI36     | 14XJS | 15     | 43.61    | NAU3177        | 6.22  | 7.11   | 0.46  |        |                                                                                                |
|              | qFL-C15-1 | CCRI45     | 09HNA | 15     | 43.61    | NAU3177        | 7.98  | 10.00  | 1.75  | BI-QTL |                                                                                                |
|              |           | CCRI45     | 10HNA | 15     | 43.61    | NAU3177        | 2.98  | 4.08   | 1.10  |        |                                                                                                |
|              |           | CCRI45     | 11XJA | 15     | 43.61    | NAU3177        | 4.09  | 5.44   | 1.05  |        |                                                                                                |
|              |           | CCRI45     | 11HNA | 15     | 43.61    | NAU3177        | 2.93  | 4.04   | 1.20  |        |                                                                                                |
|              |           | CCRI45     | 14XJK | 15     | 43.61    | NAU3177        | 3.52  | 4.81   | 1.27  |        |                                                                                                |
|              |           | CCRI45     | 14HNZ | 15     | 43.61    | NAU3177        | 4.63  | 6.15   | 1.32  |        |                                                                                                |

|             |           |        |       |        |         |         |       |       |       |        |                                     |
|-------------|-----------|--------|-------|--------|---------|---------|-------|-------|-------|--------|-------------------------------------|
|             |           | CCRI45 | 15HNA | 15     | 43.61   | NAU3177 | 3.17  | 4.15  | 0.90  |        |                                     |
|             |           | CCRI45 | 15HNZ | 15     | 43.61   | NAU3177 | 6.39  | 8.41  | 1.52  |        |                                     |
|             | qFS-C15-3 | CCRI36 | 14XJS | 15     | 43.61   | NAU3177 | 2.51  | 3.17  | 0.44  | BI-QTL | Li et al., 2019b                    |
|             | qFS-C15-3 | CCRI45 | 09HNA | 15     | 43.61   | NAU3177 | 4.53  | 6.05  | 1.39  | BI-QTL | Li et al., 2019b                    |
|             |           | CCRI45 | 11XJA | 15     | 43.61   | NAU3177 | 4.87  | 6.20  | 1.55  |        |                                     |
|             |           | CCRI45 | 11HNA | 15     | 43.61   | NAU3177 | 4.21  | 5.66  | 1.23  |        |                                     |
|             |           | CCRI45 | 15HNA | 15     | 43.61   | NAU3177 | 4.38  | 5.99  | 1.45  |        |                                     |
| BISER-C16-1 | qFL-C16-2 | CCRI36 | 14XJN | 16     | 65.97   | BNL2634 | 3.39  | 3.86  | 0.94  | BI-QTL | Shen et al., 2005; Li et al., 2019b |
|             | qFL-C16-2 | CCRI45 | 09HNA | 16     | 65.97   | BNL2634 | 13.43 | 16.95 | 1.24  | BI-QTL | Shen et al., 2005; Li et al., 2019b |
|             |           | CCRI45 | 10HNA | 16     | 65.97   | BNL2634 | 4.96  | 6.63  | 0.76  |        |                                     |
|             |           | CCRI45 | 11XJA | 16     | 65.97   | BNL2634 | 4.25  | 5.71  | 0.78  |        |                                     |
|             |           | CCRI45 | 11HNA | 16     | 65.97   | BNL2634 | 4.36  | 5.86  | 0.59  |        |                                     |
|             |           | CCRI45 | 14XJK | 16     | 65.97   | BNL2634 | 4.47  | 5.98  | 0.77  |        |                                     |
|             |           | CCRI45 | 14HNZ | 16     | 65.97   | BNL2634 | 6.33  | 8.38  | 0.84  |        |                                     |
|             |           | CCRI45 | 15HNA | 16     | 65.97   | BNL2634 | 6.43  | 8.54  | 0.83  |        |                                     |
|             |           | CCRI45 | 15HNZ | 16     | 65.97   | BNL2634 | 3.93  | 5.27  | 0.56  |        |                                     |
|             | qFS-C16-3 | CCRI36 | 11HNA | 16     | 65.97   | BNL2634 | 4.05  | 4.67  | 1.14  | BI-QTL | Shen et al., 2005; Li et al., 2019b |
|             |           | CCRI36 | 11LNL | 16     | 65.97   | BNL2634 | 4.03  | 4.61  | 1.00  |        |                                     |
|             | qFS-C16-3 | CCRI45 | 11XJA | 16     | 65.97   | BNL2634 | 10.37 | 13.37 | 1.24  | BI-QTL | Shen et al., 2005; Li et al., 2019b |
|             |           | CCRI45 | 11HNA | 16     | 65.97   | BNL2634 | 3.09  | 4.18  | 1.03  |        |                                     |
|             |           | CCRI45 | 15HNA | 16     | 65.97   | BNL2634 | 2.81  | 3.82  | 0.63  |        |                                     |
|             | qFL-C17-3 | CCRI45 | 09HNA | 17     | 47.26   | NAU2909 | 10.78 | 13.85 | 1.18  |        |                                     |
|             |           | CCRI45 | 10HNA | 17     | 47.26   | NAU2909 | 2.78  | 3.77  | 0.61  |        |                                     |
|             |           | CCRI45 | 11XJA | 17     | 47.26   | NAU2909 | 2.56  | 3.48  | 0.64  |        |                                     |
|             |           | CCRI45 | 11HNA | 17     | 47.26   | NAU2909 | 5.22  | 6.96  | 0.81  |        |                                     |
|             |           | CCRI45 | 14XJK | 17     | 47.26   | NAU2909 | 2.65  | 3.60  | 0.49  |        |                                     |
|             |           | CCRI45 | 14HNZ | 17     | 47.26   | NAU2909 | 5.21  | 6.93  | 0.88  |        |                                     |
|             | CCRI45    | 15HNA  | 17    | 47.26  | NAU2909 | 4.63    | 6.22  | 0.75  |       |        |                                     |
| BISER-C17-1 | qFM-C17-2 | CCRI36 | 10HNA | 17     | 47.26   | NAU2909 | 8.97  | 9.59  | -0.18 | BI-QTL | Zhai et al., 2016                   |
|             |           | CCRI36 | 11HNA | 17     | 47.26   | NAU2909 | 6.50  | 7.04  | -0.17 |        |                                     |
|             |           | CCRI36 | 11LNL | 17     | 47.26   | NAU2909 | 9.05  | 9.67  | -0.20 |        |                                     |
|             |           | CCRI36 | 11XJS | 17     | 47.26   | NAU2909 | 6.46  | 6.99  | -0.18 |        |                                     |
|             |           | CCRI36 | 14XJN | 17     | 47.26   | NAU2909 | 8.94  | 9.55  | -0.16 |        |                                     |
|             |           | CCRI36 | 14XJS | 17     | 47.26   | NAU2909 | 4.52  | 4.95  | -0.12 |        |                                     |
|             | qFM-C17-2 | CCRI45 | 15HNA | 17     | 47.26   | NAU2909 | 2.72  | 3.68  | -0.18 | BI-QTL | Zhai et al., 2016                   |
|             |           | CCRI45 | 15HNZ | 17     | 47.26   | NAU2909 | 4.30  | 5.76  | -0.20 |        |                                     |
|             | qFS-C17-1 | CCRI45 | 11XJA | 17     | 47.26   | NAU2909 | 2.93  | 3.99  | 0.68  |        | Ning et al., 2014                   |
|             |           | CCRI45 | 11HNA | 17     | 47.26   | NAU2909 | 8.04  | 10.52 | 1.16  |        |                                     |
|             | CCRI45    | 15HNA  | 17    | 47.26  | NAU2909 | 3.90    | 5.23  | 1.22  |       |        |                                     |
| BISER-C17-2 | qFL-C17-5 | CCRI36 | 11HNA | 17     | 122.79  | NAU0193 | 3.08  | 3.42  | 0.36  |        |                                     |
|             |           | CCRI36 | 11LNL | 17     | 122.79  | NAU0193 | 3.84  | 4.36  | 0.43  |        |                                     |
|             |           | CCRI36 | 11XJS | 17     | 122.79  | NAU0193 | 6.91  | 7.72  | 0.56  |        |                                     |
|             |           | CCRI36 | 14XJS | 17     | 122.79  | NAU0193 | 6.54  | 7.31  | 0.53  |        |                                     |
|             | qFM-C17-4 | CCRI36 | 10HNA | 17     | 122.79  | NAU0193 | 5.48  | 6.10  | -0.22 |        | Wang et al., 2016                   |
|             |           | CCRI36 | 11HNA | 17     | 122.79  | NAU0193 | 3.80  | 4.32  | -0.21 |        |                                     |
|             |           | CCRI36 | 11LNL | 17     | 122.79  | NAU0193 | 4.82  | 5.27  | -0.24 |        |                                     |
|             |           | CCRI36 | 11XJS | 17     | 122.79  | NAU0193 | 5.50  | 6.11  | -0.24 |        |                                     |
|             |           | CCRI36 | 14XJN | 17     | 122.79  | NAU0193 | 7.30  | 8.08  | -0.23 |        |                                     |
|             |           | CCRI36 | 14XJS | 17     | 122.79  | NAU0193 | 3.57  | 4.11  | -0.16 |        |                                     |
|             | qFS-C17-3 | CCRI36 | 11HNA | 17     | 122.79  | NAU0193 | 2.68  | 3.03  | 0.44  | BI-QTL | Li et al., 2019b                    |
|             |           | CCRI36 | 11LNL | 17     | 122.79  | NAU0193 | 2.57  | 2.91  | 0.38  |        |                                     |
|             | qFS-C17-3 | CCRI45 | 11XJA | 17     | 122.79  | NAU0193 | 2.73  | 4.42  | 0.29  | BI-QTL | Li et al., 2019b                    |
|             | CCRI45    | 14XJA  | 17    | 122.79 | NAU0193 | 2.80    | 4.51  | 0.32  |       |        |                                     |

|           |           |        |       |       |         |           |       |       |      |  |                                        |
|-----------|-----------|--------|-------|-------|---------|-----------|-------|-------|------|--|----------------------------------------|
| SER-C2-1  | qFL-C2-3  | CCRI45 | 10HNA | 2     | 54.78   | HAU1780   | 10.65 | 13.68 | 1.34 |  | Zhai et al., 2016                      |
|           |           | CCRI45 | 11XJA | 2     | 54.78   | HAU1780   | 11.96 | 15.33 | 1.40 |  |                                        |
|           |           | CCRI45 | 11HNA | 2     | 54.78   | HAU1780   | 7.11  | 9.67  | 1.17 |  |                                        |
|           |           | CCRI45 | 14XJA | 2     | 54.78   | HAU1780   | 4.50  | 6.21  | 0.72 |  |                                        |
|           |           | CCRI45 | 14XJK | 2     | 54.78   | HAU1780   | 3.43  | 4.80  | 0.81 |  |                                        |
|           |           | CCRI45 | 14HNZ | 2     | 54.78   | HAU1780   | 8.60  | 11.40 | 1.03 |  |                                        |
|           |           | CCRI45 | 15HNA | 2     | 54.78   | HAU1780   | 6.42  | 8.66  | 1.16 |  |                                        |
|           |           | CCRI45 | 15HNZ | 2     | 54.78   | HAU1780   | 7.53  | 9.81  | 0.95 |  |                                        |
|           | qFS-C2-1  | CCRI45 | 09HNA | 2     | 54.78   | HAU1780   | 2.66  | 3.61  | 0.85 |  |                                        |
|           |           | CCRI45 | 11XJA | 2     | 54.78   | HAU1780   | 7.59  | 9.88  | 1.27 |  |                                        |
|           |           | CCRI45 | 11HNA | 2     | 54.78   | HAU1780   | 6.13  | 8.37  | 1.23 |  |                                        |
|           |           | CCRI45 | 14XJA | 2     | 54.78   | HAU1780   | 3.72  | 5.18  | 0.84 |  |                                        |
|           |           | CCRI45 | 14HNZ | 2     | 54.78   | HAU1780   | 4.83  | 6.61  | 1.10 |  |                                        |
|           |           | CCRI45 | 15HNA | 2     | 54.78   | HAU1780   | 6.35  | 8.50  | 1.83 |  |                                        |
|           | CCRI45    | 15HNZ  | 2     | 54.78 | HAU1780 | 2.56      | 3.47  | 0.68  |      |  |                                        |
| SER-C7-1  | qFL-C7-2  | CCRI45 | 11XJA | 7     | 53.19   | PGML01950 | 4.27  | 5.75  | 0.62 |  |                                        |
|           |           | CCRI45 | 11HNA | 7     | 53.19   | PGML01950 | 6.81  | 8.99  | 0.82 |  |                                        |
|           |           | CCRI45 | 14XJK | 7     | 53.19   | PGML01950 | 2.98  | 4.03  | 0.54 |  |                                        |
|           | qFS-C7-2  | CCRI45 | 10HNA | 7     | 53.19   | PGML01950 | 3.21  | 4.34  | 0.63 |  |                                        |
|           |           | CCRI45 | 11XJA | 7     | 53.19   | PGML01950 | 5.84  | 7.78  | 0.82 |  |                                        |
|           |           | CCRI45 | 11HNA | 7     | 53.19   | PGML01950 | 16.07 | 19.93 | 1.38 |  |                                        |
| SER-C10-1 | qFL-C10-2 | CCRI45 | 11XJA | 10    | 178.11  | BNL3563   | 5.48  | 7.32  | 0.75 |  | Shi et al., 2019                       |
|           |           | CCRI45 | 11HNA | 10    | 178.11  | BNL3563   | 7.96  | 10.42 | 0.95 |  |                                        |
|           |           | CCRI45 | 14XJK | 10    | 178.11  | BNL3563   | 3.02  | 4.09  | 0.58 |  |                                        |
|           | qFS-C10-3 | CCRI45 | 10HNA | 10    | 178.11  | BNL3563   | 3.23  | 4.38  | 0.68 |  |                                        |
|           |           | CCRI45 | 11XJA | 10    | 178.11  | BNL3563   | 8.23  | 10.79 | 1.03 |  |                                        |
|           |           | CCRI45 | 11HNA | 10    | 178.11  | BNL3563   | 18.84 | 22.94 | 1.58 |  |                                        |
| SER-C12-1 | qFL-C12-3 | CCRI45 | 11XJA | 12    | 84.57   | HAU1361   | 3.23  | 4.40  | 0.57 |  |                                        |
|           |           | CCRI45 | 15HNZ | 12    | 84.57   | HAU1361   | 3.17  | 4.28  | 0.31 |  |                                        |
|           | qFS-C12-1 | CCRI45 | 09HNA | 12    | 84.57   | HAU1361   | 3.68  | 5.46  | 0.65 |  | Wang et al., 2012;<br>Shi et al., 2019 |
|           |           | CCRI45 | 11XJA | 12    | 84.57   | HAU1361   | 4.26  | 6.21  | 1.08 |  |                                        |
|           |           | CCRI45 | 11HNA | 12    | 84.57   | HAU1361   | 6.15  | 8.72  | 0.90 |  |                                        |
|           |           | CCRI45 | 14XJA | 12    | 84.57   | HAU1361   | 4.33  | 5.81  | 0.51 |  |                                        |
|           |           | CCRI45 | 14HNZ | 12    | 84.57   | HAU1361   | 3.66  | 4.94  | 0.47 |  |                                        |
| SER-C12-2 | qFL-C12-4 | CCRI45 | 09HNA | 12    | 110.86  | NAU4889   | 12.12 | 15.42 | 1.29 |  |                                        |
|           |           | CCRI45 | 10HNA | 12    | 110.86  | NAU4889   | 3.57  | 4.81  | 0.71 |  |                                        |
|           |           | CCRI45 | 11XJA | 12    | 110.86  | NAU4889   | 5.99  | 7.95  | 0.89 |  |                                        |
|           |           | CCRI45 | 11HNA | 12    | 110.86  | NAU4889   | 3.41  | 4.61  | 0.57 |  |                                        |
|           |           | CCRI45 | 14XJK | 12    | 110.86  | NAU4889   | 3.17  | 4.28  | 0.55 |  |                                        |
|           |           | CCRI45 | 14HNZ | 12    | 110.86  | NAU4889   | 5.54  | 7.40  | 0.85 |  |                                        |
|           |           | CCRI45 | 15HNZ | 12    | 110.86  | NAU4889   | 3.61  | 4.87  | 0.78 |  |                                        |
|           | qFS-C12-2 | CCRI45 | 09HNA | 12    | 110.86  | NAU4889   | 4.58  | 6.12  | 1.36 |  |                                        |
|           |           | CCRI45 | 11XJA | 12    | 110.86  | NAU4889   | 3.37  | 4.56  | 1.07 |  |                                        |
|           |           | CCRI45 | 11HNA | 12    | 110.86  | NAU4889   | 3.75  | 5.08  | 0.79 |  |                                        |
|           |           | CCRI45 | 15HNA | 12    | 110.86  | NAU4889   | 9.47  | 12.28 | 1.30 |  |                                        |
| SER-C13-1 | qFL-C13-1 | CCRI45 | 10HNA | 13    | 8.68    | BNL1707   | 3.07  | 4.17  | 0.60 |  |                                        |
|           |           | CCRI45 | 11XJA | 13    | 8.68    | BNL1707   | 2.76  | 3.75  | 0.58 |  |                                        |
|           | qFS-C13-1 | CCRI45 | 11XJA | 13    | 8.68    | BNL1707   | 2.53  | 3.44  | 0.62 |  |                                        |
|           |           | CCRI45 | 11HNA | 13    | 8.68    | BNL1707   | 3.90  | 5.25  | 0.80 |  |                                        |
| SER-C13-2 | qFL-C13-3 | CCRI45 | 10HNA | 13    | 164.25  | CGR5242   | 2.74  | 3.71  | 0.61 |  |                                        |
|           |           | CCRI45 | 11XJA | 13    | 164.25  | CGR5242   | 3.26  | 4.40  | 0.68 |  |                                        |
|           |           | CCRI45 | 11HNA | 13    | 164.25  | CGR5242   | 5.36  | 7.14  | 0.88 |  |                                        |

|           |           |        |       |    |        |           |       |       |       |  |                                         |
|-----------|-----------|--------|-------|----|--------|-----------|-------|-------|-------|--|-----------------------------------------|
|           |           | CCRI45 | 14XJK | 13 | 164.25 | CGR5242   | 4.37  | 5.88  | 0.75  |  |                                         |
|           | qFS-C13-3 | CCRI45 | 11XJA | 13 | 164.25 | CGR5242   | 4.10  | 5.53  | 0.83  |  |                                         |
|           |           | CCRI45 | 11HNA | 13 | 164.25 | CGR5242   | 3.49  | 4.42  | 1.68  |  |                                         |
| SER-C14-1 | qFL-C14-1 | CCRI45 | 11XJA | 14 | 40.73  | NAU3648   | 7.92  | 10.41 | 1.04  |  | Zhai et al., 2016                       |
|           |           | CCRI45 | 14XJA | 14 | 40.73  | NAU3648   | 2.81  | 3.81  | 0.51  |  |                                         |
|           | qFS-C14-1 | CCRI45 | 09HNA | 14 | 40.73  | NAU3648   | 3.77  | 5.08  | 0.75  |  | Zhai et al., 2016                       |
|           |           | CCRI45 | 11XJA | 14 | 40.73  | NAU3648   | 12.19 | 15.55 | 1.43  |  |                                         |
|           |           | CCRI45 | 11HNA | 14 | 40.73  | NAU3648   | 2.73  | 3.69  | 1.09  |  |                                         |
|           |           | CCRI45 | 14XJA | 14 | 40.73  | NAU3648   | 4.03  | 5.42  | 1.20  |  |                                         |
|           |           | CCRI45 | 15HNA | 14 | 40.73  | NAU3648   | 3.15  | 4.25  | 0.87  |  |                                         |
|           |           | CCRI45 | 15HNZ | 14 | 40.73  | NAU3648   | 5.57  | 7.41  | 1.04  |  |                                         |
|           | qFL-C14-2 | CCRI45 | 14XJK | 14 | 46.54  | NAU5421   | 2.68  | 3.64  | -0.83 |  | Zhai et al., 2016                       |
| SER-C14-2 | qFL-C14-7 | CCRI45 | 11HNA | 14 | 206.88 | HAU1219   | 3.48  | 4.70  | -0.79 |  |                                         |
|           |           | CCRI45 | 15HNZ | 14 | 206.88 | HAU1219   | 2.92  | 3.95  | -0.58 |  |                                         |
|           | qFS-C14-4 | CCRI45 | 09HNA | 14 | 206.88 | HAU1219   | 2.58  | 3.51  | -0.77 |  |                                         |
|           |           | CCRI45 | 11HNA | 14 | 206.88 | HAU1219   | 3.22  | 4.35  | -1.16 |  |                                         |
|           |           | CCRI45 | 15HNZ | 14 | 206.88 | HAU1219   | 2.51  | 3.40  | -0.84 |  |                                         |
| SER-C15-1 | qFM-C15-1 | CCRI45 | 10HNA | 15 | 26.90  | HAU1058a  | 2.91  | 3.99  | 0.19  |  | Chen et al., 2018;<br>Wang et al., 2016 |
|           |           | CCRI45 | 11HNA | 15 | 26.90  | HAU1058   | 2.62  | 3.59  | 0.15  |  |                                         |
|           | qFS-C15-2 | CCRI45 | 09HNA | 15 | 26.90  | HAU1058   | 6.72  | 8.93  | 1.03  |  | Chen et al., 2018                       |
|           |           | CCRI45 | 11XJA | 15 | 26.90  | HAU1058   | 3.09  | 4.17  | 0.88  |  |                                         |
|           |           | CCRI45 | 14XJA | 15 | 26.90  | HAU1058   | 3.02  | 4.10  | 0.84  |  |                                         |
|           |           | CCRI45 | 14XJK | 15 | 26.90  | HAU1058   | 4.82  | 6.42  | 0.74  |  |                                         |
|           |           | CCRI45 | 15HNA | 15 | 26.90  | HAU1058   | 4.71  | 6.33  | 0.67  |  |                                         |
| SER-C16-1 | qFM-C16-1 | CCRI45 | 09HNA | 16 | 16.79  | CGR5149   | 2.52  | 3.43  | 0.24  |  |                                         |
|           |           | CCRI45 | 10HNA | 16 | 16.79  | CGR5149   | 3.34  | 4.52  | 0.20  |  |                                         |
|           | qFS-C16-1 | CCRI45 | 09HNA | 16 | 16.79  | CGR5149   | 3.57  | 4.82  | 0.76  |  |                                         |
|           |           | CCRI45 | 11XJA | 16 | 16.79  | CGR5149   | 2.66  | 3.61  | 0.79  |  |                                         |
|           |           | CCRI45 | 14XJA | 16 | 16.79  | CGR5149   | 2.70  | 3.65  | 0.65  |  |                                         |
|           |           | CCRI45 | 14XJK | 16 | 16.79  | CGR5149   | 6.15  | 8.17  | 0.84  |  |                                         |
|           |           | CCRI45 | 15HNZ | 16 | 16.79  | CGR5149   | 6.35  | 8.40  | 0.77  |  |                                         |
| SER-C16-2 | qFL-C16-3 | CCRI36 | 10HNA | 16 | 176.71 | BNL3065   | 3.10  | 3.50  | -0.63 |  | Shi et al., 2019                        |
|           |           | CCRI36 | 11HNA | 16 | 176.71 | BNL3065   | 2.75  | 3.10  | -0.70 |  |                                         |
|           |           | CCRI36 | 11LNL | 16 | 176.71 | BNL3065   | 3.05  | 3.44  | -0.64 |  |                                         |
|           | qFS-C16-4 | CCRI36 | 10HNA | 16 | 176.71 | BNL3065   | 3.81  | 4.21  | -0.99 |  | Shi et al., 2019                        |
|           |           | CCRI36 | 11HNA | 16 | 176.71 | BNL3065   | 3.02  | 3.39  | -0.69 |  |                                         |
|           |           | CCRI36 | 11LNL | 16 | 176.71 | BNL3065   | 3.32  | 3.73  | -0.82 |  |                                         |
|           |           | CCRI36 | 11XJS | 16 | 176.71 | BNL3065   | 3.28  | 3.69  | -0.72 |  |                                         |
| SER-C19-1 | qFL-C19-1 | CCRI45 | 11XJA | 19 | 17.39  | NAU3405   | 4.28  | 5.76  | 0.70  |  | Wang et al., 2017a                      |
|           |           | CCRI45 | 11HNA | 19 | 17.39  | NAU3405   | 7.37  | 9.70  | 0.96  |  |                                         |
|           |           | CCRI45 | 14XJK | 19 | 17.39  | NAU3405   | 2.51  | 3.41  | 0.56  |  |                                         |
|           | qFS-C19-1 | CCRI45 | 10HNA | 19 | 17.39  | NAU3405   | 2.62  | 3.56  | 0.65  |  |                                         |
|           |           | CCRI45 | 11XJA | 19 | 17.39  | NAU3405   | 6.80  | 9.00  | 0.99  |  |                                         |
|           |           | CCRI45 | 11HNA | 19 | 17.39  | NAU3405   | 15.48 | 19.27 | 1.53  |  |                                         |
| SER-C20-1 | qFL-C20-3 | CCRI45 | 11XJA | 20 | 139.90 | HAU1491   | 7.79  | 10.25 | 0.59  |  |                                         |
|           |           | CCRI45 | 14XJA | 20 | 139.90 | HAU1491   | 3.66  | 4.93  | 0.33  |  |                                         |
|           |           | CCRI45 | 14XJK | 20 | 139.90 | HAU1491   | 3.78  | 5.07  | 0.35  |  |                                         |
|           |           | CCRI45 | 15HNZ | 20 | 139.90 | HAU1491   | 3.94  | 5.30  | 0.44  |  |                                         |
|           | qFS-C20-3 | CCRI45 | 09HNA | 20 | 139.90 | HAU1491   | 4.66  | 6.38  | 0.55  |  |                                         |
|           |           | CCRI45 | 11XJA | 20 | 139.90 | HAU1491   | 4.25  | 5.71  | 0.52  |  |                                         |
|           |           | CCRI45 | 11HNA | 20 | 139.90 | HAU1491   | 2.63  | 3.55  | 0.61  |  |                                         |
|           |           | CCRI45 | 14XJA | 20 | 139.90 | HAU1491   | 3.34  | 4.51  | 0.63  |  |                                         |
|           |           | CCRI45 | 14HNZ | 20 | 139.90 | HAU1491   | 2.93  | 3.95  | 0.29  |  |                                         |
|           |           | CCRI45 | 15HNA | 20 | 139.90 | HAU1491   | 5.72  | 6.90  | 0.63  |  |                                         |
|           |           | CCRI45 | 15HNZ | 20 | 139.90 | HAU1491   | 2.51  | 3.41  | 0.40  |  |                                         |
| SER-C21-1 | qFL-C21-4 | CCRI45 | 10HNA | 21 | 238.32 | PGML00972 | 3.31  | 4.31  | 1.80  |  |                                         |

|           |           |           |        |       |        |               |       |       |      |      |                                        |
|-----------|-----------|-----------|--------|-------|--------|---------------|-------|-------|------|------|----------------------------------------|
|           |           | CCRI45    | 11XJA  | 21    | 238.32 | PGML009<br>72 | 2.65  | 3.60  | 0.56 |      |                                        |
|           |           | CCRI45    | 11HNA  | 21    | 238.32 | PGML009<br>72 | 7.61  | 9.99  | 1.15 |      |                                        |
|           |           | CCRI45    | 14HNZ  | 21    | 238.32 | PGML009<br>72 | 3.21  | 4.34  | 0.73 |      |                                        |
|           |           | CCRI45    | 15HNZ  | 21    | 238.32 | PGML009<br>72 | 2.95  | 4.01  | 0.69 |      |                                        |
|           | qFS-C21-4 | CCRI45    | 09HNA  | 21    | 238.32 | PGML009<br>72 | 2.79  | 3.78  | 1.08 |      | Wang et al., 2016;<br>Shi et al., 2019 |
|           |           | CCRI45    | 11HNA  | 21    | 238.32 | PGML009<br>72 | 3.73  | 5.00  | 2.19 |      |                                        |
| SER-C21-2 | qFL-C21-5 | CCRI45    | 10HNA  | 21    | 241.43 | Gh132         | 3.32  | 4.53  | 1.43 |      |                                        |
|           |           | CCRI45    | 11XJA  | 21    | 241.43 | Gh132         | 2.70  | 3.66  | 0.62 |      |                                        |
|           |           | CCRI45    | 11HNA  | 21    | 241.43 | Gh132         | 2.50  | 3.40  | 0.49 |      |                                        |
|           |           | CCRI45    | 14XJK  | 21    | 241.43 | Gh132         | 3.42  | 4.59  | 1.46 |      |                                        |
|           |           | CCRI45    | 14HNZ  | 21    | 241.43 | Gh132         | 4.31  | 5.77  | 1.38 |      |                                        |
|           |           | CCRI45    | 14HNZ  | 21    | 241.43 | Gh132         | 5.64  | 7.20  | 1.90 |      |                                        |
|           |           | CCRI45    | 15HNA  | 21    | 241.43 | Gh132         | 3.45  | 4.64  | 0.74 |      |                                        |
|           |           | CCRI45    | 15HNZ  | 21    | 241.43 | Gh132         | 3.47  | 4.67  | 0.57 |      |                                        |
|           |           | qFS-C21-5 | CCRI45 | 11HNA | 21     | 241.43        | Gh132 | 4.27  | 5.51 | 1.87 |                                        |
|           |           | CCRI45    | 15HNA  | 21    | 241.43 | Gh132         | 3.03  | 4.09  | 1.11 |      |                                        |
| SER-C22-1 | qFL-C22-3 | CCRI45    | 11XJA  | 22    | 152.64 | NAU1325       | 7.55  | 9.91  | 0.92 |      |                                        |
|           |           | CCRI45    | 11HNA  | 22    | 152.64 | NAU1325       | 2.58  | 3.51  | 0.54 |      |                                        |
|           |           | CCRI45    | 14XJK  | 22    | 152.64 | NAU1325       | 4.44  | 5.98  | 0.68 |      |                                        |
|           | qFS-C22-3 | CCRI45    | 10HNA  | 22    | 152.64 | NAU1325       | 2.79  | 3.79  | 0.63 |      |                                        |
|           |           | CCRI45    | 11XJA  | 22    | 152.64 | NAU1325       | 7.24  | 9.55  | 0.97 |      |                                        |
|           |           | CCRI45    | 11HNA  | 22    | 152.64 | NAU1325       | 17.15 | 21.12 | 1.52 |      |                                        |

Env. Environment; BI-QTL, background-independent QTL
